# Supplementary material for: Pseudohalide HCN aggregate ions: [N3(HCN)3]−, [OCN(HCN)3]−, [SCN(HCN)2]− and [P(CN·HCN)2]−
Source: Royal Society of Chemistry journal article supplement (doi:10.1039/d0dt02973d), 2020-01-01
Supplement: d0dt02973d1.pdf [file d0dt02973d1.pdf]

## Supporting Information

# Pseudohalide HCN Aggregate Ions: [N<sub>3</sub>(HCN)<sub>3</sub>]<sup>-</sup>, [OCN(HCN)<sub>3</sub>]<sup>-</sup>, [SCN(HCN)<sub>2</sub>]<sup>-</sup> and [P(CN·HCN)<sub>2</sub>]<sup>-</sup>

Jörg Harloff, Axel Schulz,\* Philip Stoer, Alexander Villinger

### Content

|                                                                         |    |
|-------------------------------------------------------------------------|----|
| 1 Experimental Details.....                                             | 2  |
| 2 Structure Elucidation.....                                            | 4  |
| 3 Experimental Description.....                                         | 16 |
| 3.1 Starting material synthesis.....                                    | 16 |
| 3.1.1 Synthesis of [PPN]N <sub>3</sub> .....                            | 16 |
| 3.1.2 Synthesis of [PPN]OCN.....                                        | 19 |
| 3.1.3 Synthesis of [PPN]SCN.....                                        | 22 |
| 3.1.4 Synthesis of [PPN]OCP·(CH <sub>3</sub> ) <sub>2</sub> CO.....     | 25 |
| 3.2 Product synthesis.....                                              | 28 |
| 3.2.1 Synthesis of [PPN][X(HCN) <sub>n</sub> ] salts.....               | 28 |
| 3.2.1.1 Synthesis of [PPN][N <sub>3</sub> (HCN) <sub>3</sub> ] (1)..... | 28 |
| 3.2.1.2 Synthesis of [PPN][OCN(HCN) <sub>3</sub> ] (2).....             | 30 |
| 3.2.1.3 Synthesis of [PPN][SCN(HCN) <sub>2</sub> ] (3).....             | 32 |
| 3.2.2 Synthesis of [PPN][P(CN·HCN) <sub>2</sub> ] (4).....              | 34 |
| 4 Computational Details.....                                            | 36 |
| 5 References.....                                                       | 78 |

## 1 Experimental Details

**General:** All manipulations were carried out in oxygen- and moisture-free conditions in an argon atmosphere using standard Schlenk or dry-box techniques if not mentioned otherwise. Solvents and reactants were obtained from commercial sources or synthesized as detailed in Table S1.

**Table S 1.** Origin and purification of used compounds.

| Compound                    | Origin                     | Purification                                                                                                           |
|-----------------------------|----------------------------|------------------------------------------------------------------------------------------------------------------------|
| Acetone                     | local trade                | dried with CaH <sub>2</sub> and freshly distilled, stored over molecular sieves (3 Å) and distilled again prior to use |
| Acetonitrile-d <sub>3</sub> | euriso-top                 | dried with CaH <sub>2</sub> and freshly distilled, stored over molecular sieves (3 Å)                                  |
| H <sub>2</sub> O            | local trade                | distilled twice                                                                                                        |
| HCN                         | synthesized <sup>[1]</sup> | -                                                                                                                      |
| NaOCP·Dioxane               | synthesized <sup>[2]</sup> | -                                                                                                                      |
| NaN <sub>3</sub>            | Sigma Aldrich (99.0 %)     | -                                                                                                                      |
| NaOCN                       | abcr (99.0 %)              | -                                                                                                                      |
| KSCN                        | Riedel-de Haën (99.0 %)    | -                                                                                                                      |

**NMR Spectroscopy:**  $^1\text{H}$ ,  $^{13}\text{C}\{^1\text{H}\}$  and  $^{31}\text{P}\{^1\text{H}\}$  NMR spectra were recorded with a Bruker AVANCE 250 or a Bruker AVANCE 300 spectrometer. The chemical shifts were referenced internally to the deuterated solvent ( $^{13}\text{C}\{^1\text{H}\}$ :  $\text{CD}_3\text{CN}$   $\delta_{\text{ref}} = 1.3$  ppm), to protic impurities in the deuterated solvent ( $^1\text{H}$ :  $\text{CHD}_2\text{CN}$   $\delta_{\text{ref}} = 1.94$  ppm) or externally ( $^{31}\text{P}\{^1\text{H}\}$ : 85 %  $\text{H}_3\text{PO}_4$   $\delta_{\text{ref}} = 0.0$  ppm). All measurements were carried at room temperature unless otherwise denoted.<sup>[3]</sup>

**IR Spectroscopy:** A Bruker Alpha FT-IR spectrometer with ATR device was used.

**Raman Spectroscopy:** A LabRAM HR 800 Horiba Jobin YVON equipped with an Olympus BX41 microscope with variable lenses were used. A red laser (633 nm, 17mW, HeNe-laser) was used. All measurements were carried out at ambient temperature except for hydrogen cyanide products. For these crystalline samples a Linkam THMS600 Temperature Control Stage was used to cool the substances to temperatures, which are denoted in the experimental descriptions.

**CHN Analyses:** Analysator vario micro cube from Elementar was used.

**Melting points** are uncorrected (*EZ*)-Melt, Stanford Research Systems. Heating rate  $5 \text{ K}\cdot\text{min}^{-1}$  (clearing-points are reported).

## 2 Structure Elucidation

**X-ray Structure Determination:** X-ray quality crystals were selected in Fomblin YR-1800 perfluoroether (Alfa Aesar) for low-temperature applications. Single crystals were measured on a Bruker D8 Quest diffractometer using graphite-monochromated Mo K $\alpha$  radiation ( $\lambda = 0.71073$ ). The structures were solved by direct methods (*SHELXS-2014*)<sup>[6]</sup> and refined by full-matrix least squares procedures (*SHELXL-2014*).<sup>[7]</sup> Semi empirical absorption corrections were applied (*SADABS/TWINABS*).<sup>[8]</sup> All non-hydrogen atoms were refined anisotropically and hydrogen atoms were included in the refinement at calculated positions using a riding model.

The PCO anion in the asu of [PPN][PCO] · acetone (is\_ps279) was found to be disordered, and was split in two parts. The occupancy of each part was refined freely (0.829(3)/0.171(3)). The geometry within part b was restrained to the geometry of part a within an esd of 0.01 (SAME). For the displacement parameters of the atoms within part b of the PCO anion P1b, C1b and O1b, similarity restraints were applied (SIMU, DELU). The atoms C87a, C88a and C89a, as well as all C and O-atoms in part b, were refined isotropically. The acetone molecule in the asu of [PNP][PCO] · acetone (is\_ps279, Scheme SX) was found to be disordered, and was split in four parts. The occupancy of each part was refined freely (0.679(3)/0.141(3)/0.133(3)/0.047(3)). The geometry within part b was restrained to the geometry of part a within an esd of 0.01 (SAME). In the same manner, the geometry within part c was restrained to the geometry within b, as well as the geometry within part d was restrained to geometry within part c within an esd of 0.01 (SAME). The atoms in parts b/c/d were refined isotropically. For the displacement parameters of the atoms within part a - d of the acetone molecule similarity restraints were applied (SIMU, DELU). The geometry of the acetone molecule within parts c and d was restrained to be flat within an esd of 0.02 (FLAT). For the atoms C38a/b/c/d, the displacement parameters were restrained to be equal (EADP).

The NCO anion in the asu of [PNP][NCO] · 3 HCN (av\_ps291b) was found to be disordered, and was split in two parts. The occupancy of each part was refined freely (0.261(13)/0.239(13)). The geometry within part b was restrained to the geometry of

part a within an esd of 0.01 (SAME). For the displacement parameters of the atoms within part a and b of the NCO anion, similarity restraints were applied (SIMU, DELU).

One HCN molecule in the asu of  $[\text{PNP}][\text{P}(\text{CN})_2] \cdot 1.98 \text{ HCN}$  (av\_ps292) was found to be disordered and was split in two parts. The occupancy of each part was refined freely (0.963(11)/0.019(6), part b is half-occupied). The displacement parameters in the atom pairs N3a/N3b, as well as C3a/C3b, were constrained to be equal (EADP).

|                                                           | [N(PPh <sub>3</sub> ) <sub>2</sub> ][N <sub>3</sub> (HCN) <sub>3</sub> ] (1) |
|-----------------------------------------------------------|------------------------------------------------------------------------------|
| formula                                                   | C <sub>39</sub> H <sub>33</sub> N <sub>7</sub> P <sub>2</sub>                |
| M [g mol <sup>-1</sup> ]                                  | 661.66                                                                       |
| color                                                     | colorless                                                                    |
| system                                                    | monoclinic                                                                   |
| space group                                               | C2/c                                                                         |
| a [Å]                                                     | 16.1472(5)                                                                   |
| b [Å]                                                     | 16.1089(6)                                                                   |
| c [Å]                                                     | 15.3501(5)                                                                   |
| α [°]                                                     | 90                                                                           |
| β [°]                                                     | 116.105(1)                                                                   |
| γ [°]                                                     | 90                                                                           |
| V [Å <sup>3</sup> ]                                       | 3585.5(2)                                                                    |
| Z                                                         | 4                                                                            |
| ρ <sub>calc.</sub> [g cm <sup>-3</sup> ]                  | 1.226                                                                        |
| μ [mm <sup>-1</sup> ]                                     | 0.16                                                                         |
| λ <sub>MoKα</sub> [Å]                                     | 0.71073                                                                      |
| T [K]                                                     | 123                                                                          |
| collected reflexes                                        | 35443                                                                        |
| independent reflexes                                      | 4757                                                                         |
| reflexes with I > 2σ(I)                                   | 3987                                                                         |
| R <sub>int.</sub>                                         | 0.046                                                                        |
| F(000)                                                    | 1384                                                                         |
| R <sub>1</sub> (R [F <sup>2</sup> > 2σ(F <sup>2</sup> )]) | 0.033                                                                        |
| wR <sub>2</sub> (F <sup>2</sup> )                         | 0.094                                                                        |
| Goof                                                      | 1.04                                                                         |
| parameter                                                 | 270                                                                          |
| CCDC #                                                    | 2024353                                                                      |

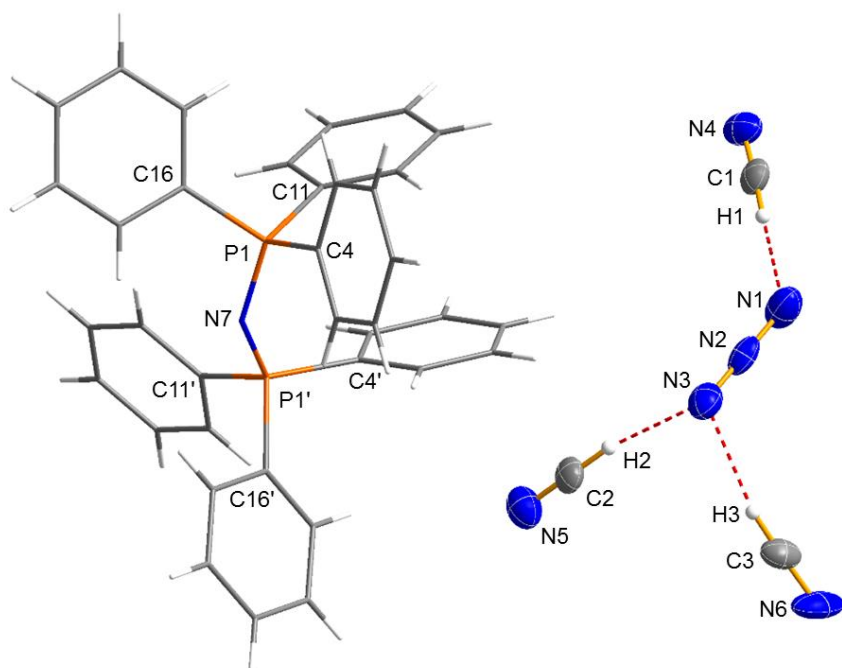

**Figure S1.** Representation of [PPN][N<sub>3</sub>(HCN)<sub>3</sub>] (**1**) in the crystal structure. Probability of thermal ellipsoids of the ORTEPs are set at 50 % at 173 K.

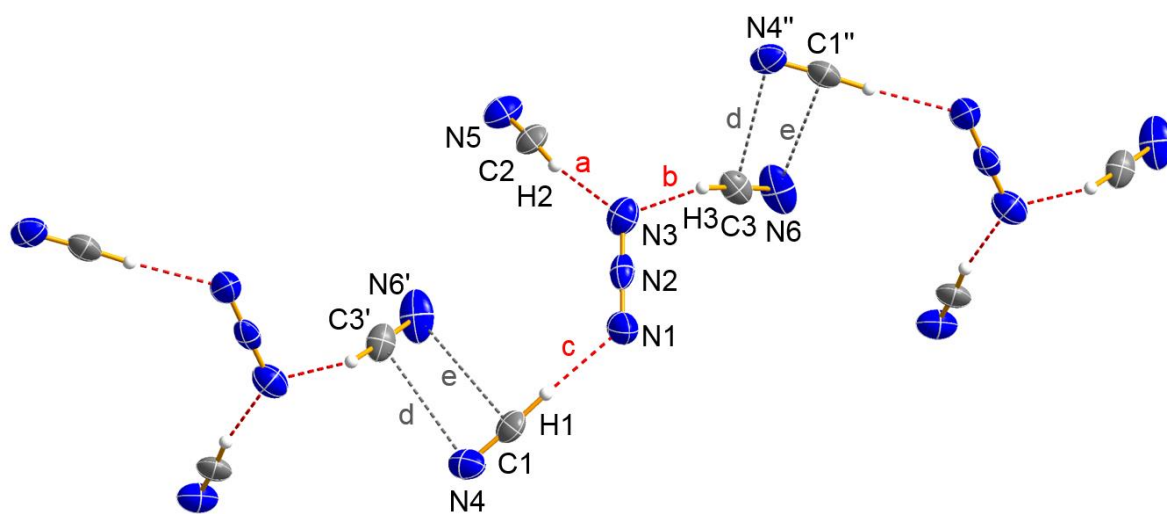

**Figure S2.** ORTEP representation of the arrangement of the anionic molecular structure of [N<sub>3</sub>(HCN)<sub>3</sub>]<sup>-</sup> in the crystal of **1** along the *c*-axis. Probability of thermal ellipsoids are set at 50 % at 173 K.

|                                             | [N(PPh <sub>3</sub> ) <sub>2</sub> ][OCN(HCN) <sub>3</sub> ] (2) |
|---------------------------------------------|------------------------------------------------------------------|
| formula                                     | C <sub>40</sub> H <sub>33</sub> N <sub>5</sub> P <sub>2</sub> O  |
| M [g mol <sup>-1</sup> ]                    | 661.65                                                           |
| color                                       | colorless                                                        |
| system                                      | monoclinic                                                       |
| space group                                 | C2/c                                                             |
| a [Å]                                       | 16.2482(5)                                                       |
| b [Å]                                       | 16.0014(5)                                                       |
| c [Å]                                       | 15.3207(5)                                                       |
| α [°]                                       | 90                                                               |
| β [°]                                       | 115.710(1)                                                       |
| γ [°]                                       | 90                                                               |
| V [Å <sup>3</sup> ]                         | 3559.1(4)                                                        |
| Z                                           | 4                                                                |
| ρ <sub>calc.</sub> [g cm <sup>-3</sup> ]    | 1.225                                                            |
| μ [mm <sup>-1</sup> ]                       | 0.16                                                             |
| λ <sub>MoKα</sub> [Å]                       | 0.71073                                                          |
| T [K]                                       | 123                                                              |
| collected reflexes                          | 34657                                                            |
| independent reflexes                        | 6213                                                             |
| reflexes with $I > 2\sigma(I)$              | 4672                                                             |
| R <sub>int.</sub>                           | 0.043                                                            |
| F(000)                                      | 1384                                                             |
| R <sub>1</sub> (R [ $F^2 > 2\sigma(F^2)$ ]) | 0.041                                                            |
| wR <sub>2</sub> (F <sup>2</sup> )           | 0.104                                                            |
| Goof                                        | 1.02                                                             |
| parameter                                   | 286                                                              |
| CCDC #                                      | 2024351                                                          |



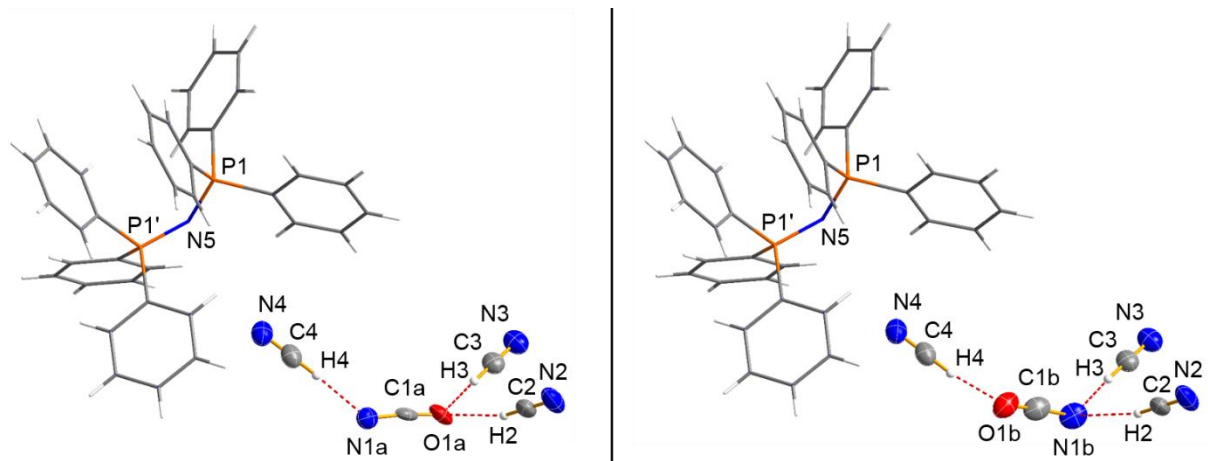

**Figure S3.** Representation of the molecular structure of an ion pair in the crystal structure of **2**. Two isomers are possible due to disorder (layer B 48 %, layer A 52 %). Probability of thermal ellipsoids are set at 50 % at 173 K.

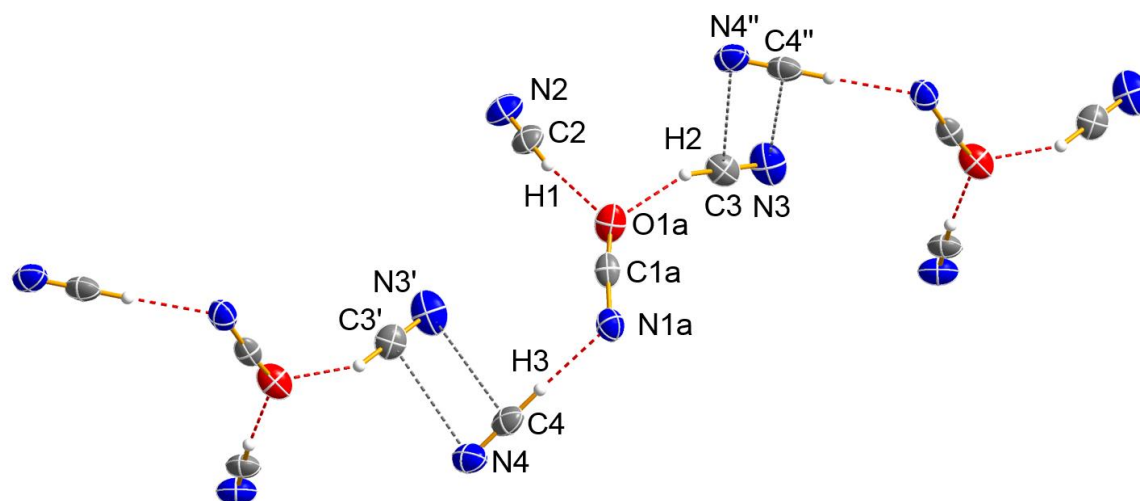

**Figure S4.** ORTEP representation of the arrangement of the anionic molecular structure of the thermodynamically favored isomer (52 %) of  $[\text{OCN}(\text{HCN})_3]^-$  in the crystal of **2** along the *c*-axis. Probability of thermal ellipsoids are set at 50 % at 173 K.

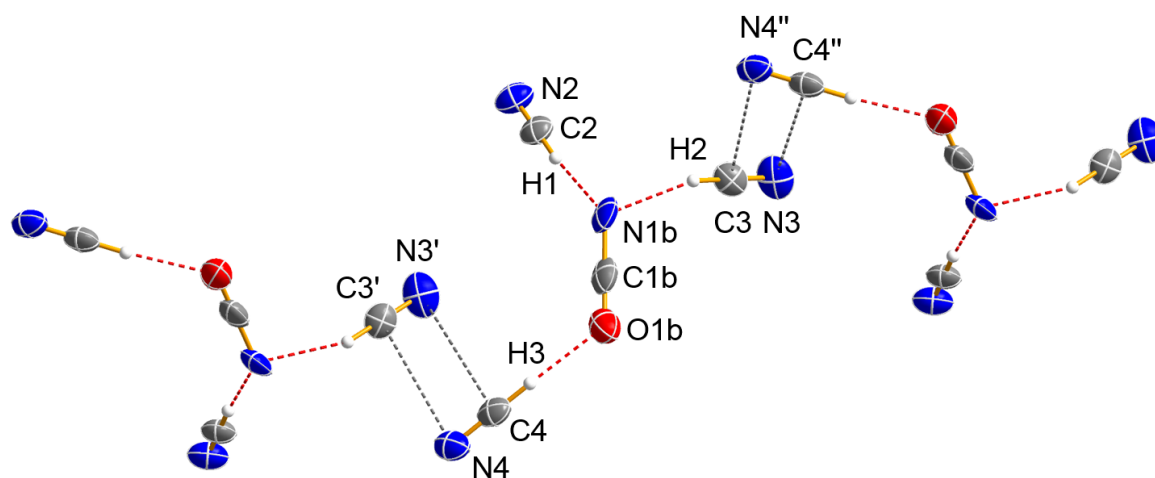

**Figure S5.** ORTEP representation of the arrangement of the anionic molecular structure of the thermodynamically slightly less favored isomer (48 %) of  $[\text{OCN}(\text{HCN})_3]^-$  in the crystal of **2** along the *c*-axis. Probability of thermal ellipsoids are set at 50 % at 173 K.

| [N(PPh <sub>3</sub> ) <sub>2</sub> ][SCN(HCN) <sub>2</sub> ] (3) |                                                                 |
|------------------------------------------------------------------|-----------------------------------------------------------------|
| formula                                                          | C <sub>39</sub> H <sub>32</sub> N <sub>4</sub> P <sub>2</sub> S |
| M [g mol <sup>-1</sup> ]                                         | 650.68                                                          |
| color                                                            | colorless                                                       |
| system                                                           | monoclinic                                                      |
| space group                                                      | <i>P</i> 2 <sub>1</sub>                                         |
| <i>a</i> [Å]                                                     | 9.0732(3)                                                       |
| <i>b</i> [Å]                                                     | 19.1434(6)                                                      |
| <i>c</i> [Å]                                                     | 9.8622(3)                                                       |
| $\alpha$ [°]                                                     | 90)                                                             |
| $\beta$ [°]                                                      | 91.602(1)                                                       |
| $\gamma$ [°]                                                     | 90                                                              |
| <i>V</i> [Å <sup>3</sup> ]                                       | 1712.32(9)                                                      |
| <i>Z</i>                                                         | 2                                                               |
| $\rho_{\text{calc.}}$ [g cm <sup>-3</sup> ]                      | 1.262                                                           |
| $\mu$ [mm <sup>-1</sup> ]                                        | 0.22                                                            |
| $\lambda_{\text{MoK}\alpha}$ [Å]                                 | 0.71073                                                         |
| <i>T</i> [K]                                                     | 123                                                             |
| collected reflexes                                               | 48620                                                           |
| independent reflexes                                             | 12377                                                           |
| refelxes with $I > 2\sigma(I)$                                   | 10431                                                           |
| <i>R</i> <sub>int.</sub>                                         | 0.043                                                           |
| <i>F</i> (000)                                                   | 680                                                             |
| <i>R</i> <sub>1</sub> ( <i>R</i> [ $F^2 > 2\sigma(F^2)$ ])       | 0.039                                                           |
| w <i>R</i> <sub>2</sub> ( <i>F</i> <sup>2</sup> )                | 0.083                                                           |
| GooF                                                             | 1.02                                                            |
| parameter                                                        | 424                                                             |
| CCDC #                                                           | 2024350                                                         |

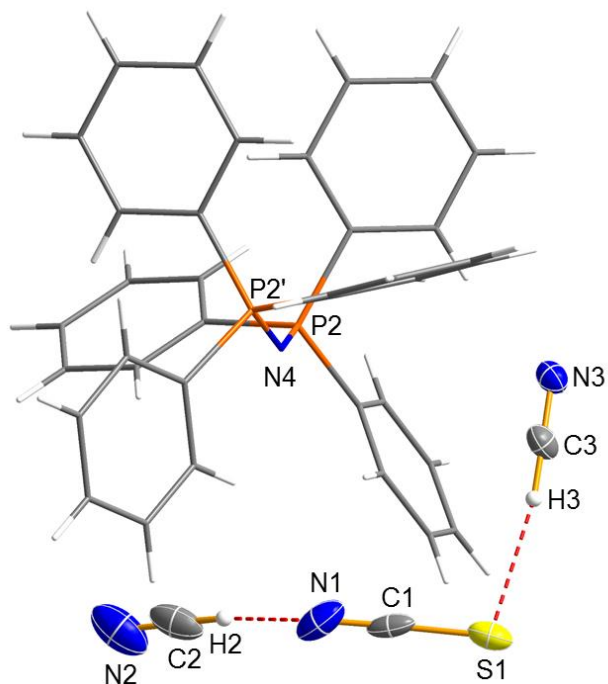

**Figure S6.** Representation of the molecular structure of an ion pair in the crystal structure of **3**. Probability of thermal ellipsoids are set at 50 % at 173 K.

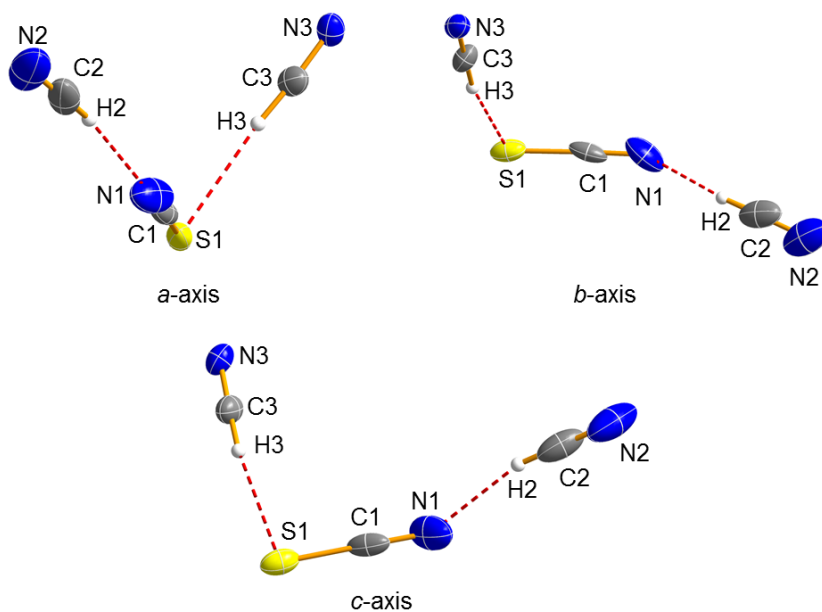

**Figure S7.** ORTEP representation of different point of views of the anion in the crystal structure of **3**. Probability of thermal ellipsoids are set at 50 % at 173 K.

|                                                            | [N(PPh <sub>3</sub> ) <sub>2</sub> ][P(CN) <sub>2</sub> (HCN) <sub>2</sub> ] (4) |
|------------------------------------------------------------|----------------------------------------------------------------------------------|
| formula                                                    | C <sub>40</sub> H <sub>32</sub> N <sub>5</sub> P <sub>4</sub>                    |
| M [g mol <sup>-1</sup> ]                                   | 675.14                                                                           |
| color                                                      | colorless                                                                        |
| system                                                     | monoclinic                                                                       |
| space group                                                | <i>P</i> 2 <sub>1</sub> / <i>c</i>                                               |
| <i>a</i> [Å]                                               | 10.9830(8)                                                                       |
| <i>b</i> [Å]                                               | 12.836(1)                                                                        |
| <i>c</i> [Å]                                               | 25.301(2)                                                                        |
| $\alpha$ [°]                                               | 90                                                                               |
| $\beta$ [°]                                                | 92.649(2)                                                                        |
| $\gamma$ [°]                                               | 90                                                                               |
| <i>V</i> [Å <sup>3</sup> ]                                 | 3563.0(5)                                                                        |
| <i>Z</i>                                                   | 4                                                                                |
| $\rho_{\text{calc.}}$ [g cm <sup>-3</sup> ]                | 1.259                                                                            |
| $\mu$ [mm <sup>-1</sup> ]                                  | 0.20                                                                             |
| $\lambda_{\text{MoK}\alpha}$ [Å]                           | 0.71073                                                                          |
| <i>T</i> [K]                                               | 123                                                                              |
| collected reflexes                                         | 19960                                                                            |
| independent reflexes                                       | 6236                                                                             |
| reflexes with $I > 2\sigma(I)$                             | 3928                                                                             |
| <i>R</i> <sub>int.</sub>                                   | 0.096                                                                            |
| <i>F</i> (000)                                             | 1407                                                                             |
| <i>R</i> <sub>1</sub> ( <i>R</i> [ $F^2 > 2\sigma(F^2)$ ]) | 0.053                                                                            |
| w <i>R</i> <sub>2</sub> ( <i>F</i> <sup>2</sup> )          | 0.119                                                                            |
| GooF                                                       | 1.01                                                                             |
| parameter                                                  | 448                                                                              |
| CCDC #                                                     | 2024352                                                                          |

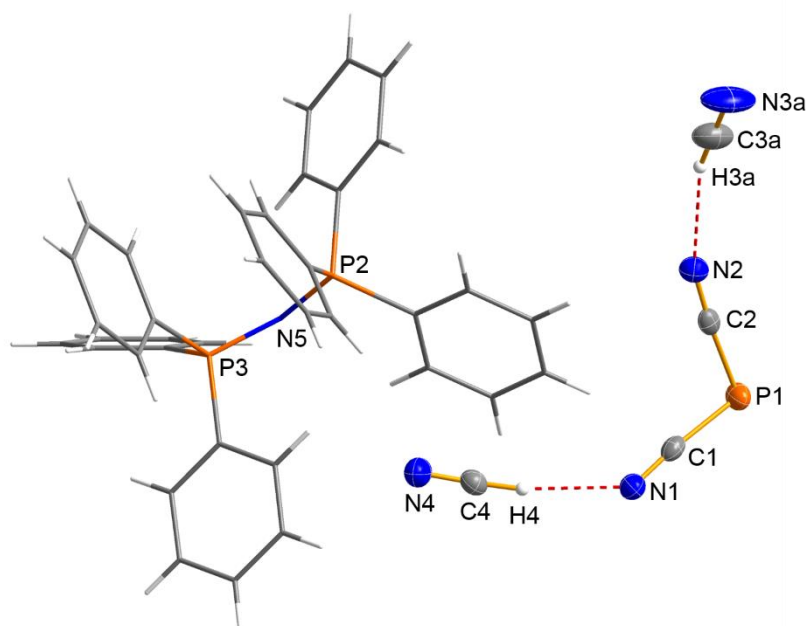

**Figure S8.** Representation of the molecular structure of an ion pair in the crystal structure of **4**. Probability of thermal ellipsoids are set at 50 % at 173 K.

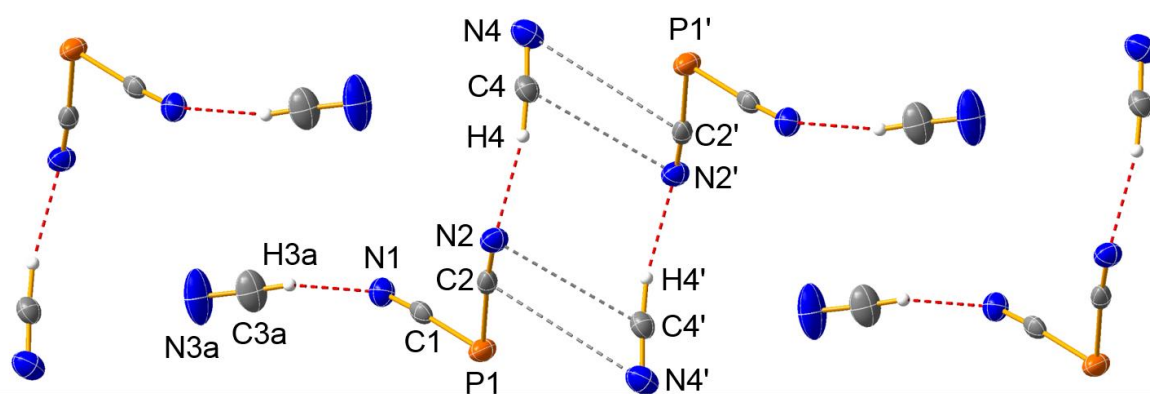

**Figure S9.** ORTEP representation of the anionic arrangement of the a-layer (96 % probability) in the crystal structure of **4**. Probability of thermal ellipsoids are set at 50 % at 173 K.

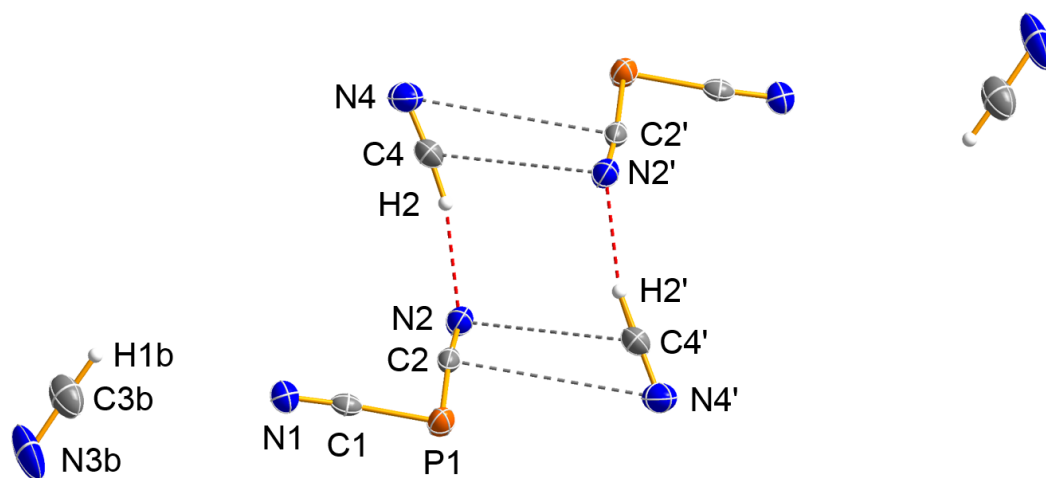

**Figure S10.** ORTEP representation of the anionic arrangement of the b-layer (4 % probability) in the crystal structure of **4**. Probability of thermal ellipsoids are set at 50 % at 173 K.

| [N(PPh <sub>3</sub> ) <sub>2</sub> ]OCP·(CH <sub>3</sub> ) <sub>2</sub> CO (5)           |                                                   |
|------------------------------------------------------------------------------------------|---------------------------------------------------|
| formula                                                                                  | C <sub>40</sub> H <sub>36</sub> NP <sub>2</sub> O |
| M [g mol <sup>-1</sup> ]                                                                 | 655.61                                            |
| color                                                                                    | colorless                                         |
| system                                                                                   | triclinic                                         |
| space group                                                                              | <i>P</i> $\bar{1}$                                |
| <i>a</i> [Å]                                                                             | 9.5122(6)                                         |
| <i>b</i> [Å]                                                                             | 10.6129(7)                                        |
| <i>c</i> [Å]                                                                             | 17.131(1)                                         |
| $\alpha$ [°]                                                                             | 91.229(2)                                         |
| $\beta$ [°]                                                                              | 95.309(2)                                         |
| $\gamma$ [°]                                                                             | 91.786(2)                                         |
| <i>V</i> [Å <sup>3</sup> ]                                                               | 1720.6(2)                                         |
| <i>Z</i>                                                                                 | 2                                                 |
| $\rho_{\text{calc.}}$ [g cm <sup>-3</sup> ]                                              | 1.265                                             |
| $\mu$ [mm <sup>-1</sup> ]                                                                | 0.21                                              |
| $\lambda_{\text{MoK}\alpha}$ [Å]                                                         | 0.71073                                           |
| <i>T</i> [K]                                                                             | 123                                               |
| collected reflexes                                                                       | 68849                                             |
| independent reflexes                                                                     | 8300                                              |
| refelxes with $I > 2\sigma(I)$                                                           | 5487                                              |
| <i>R</i> <sub>int.</sub>                                                                 | 0.118                                             |
| <i>F</i> (000)                                                                           | 688                                               |
| <i>R</i> <sub>1</sub> ( <i>R</i> [ <i>F</i> <sup>2</sup> > 2σ( <i>F</i> <sup>2</sup> )]) | 0.053                                             |
| w <i>R</i> <sub>2</sub> ( <i>F</i> <sup>2</sup> )                                        | 0.111                                             |
| GooF                                                                                     | 1.03                                              |
| parameter                                                                                | 489                                               |
| CCDC #                                                                                   | 2024349                                           |

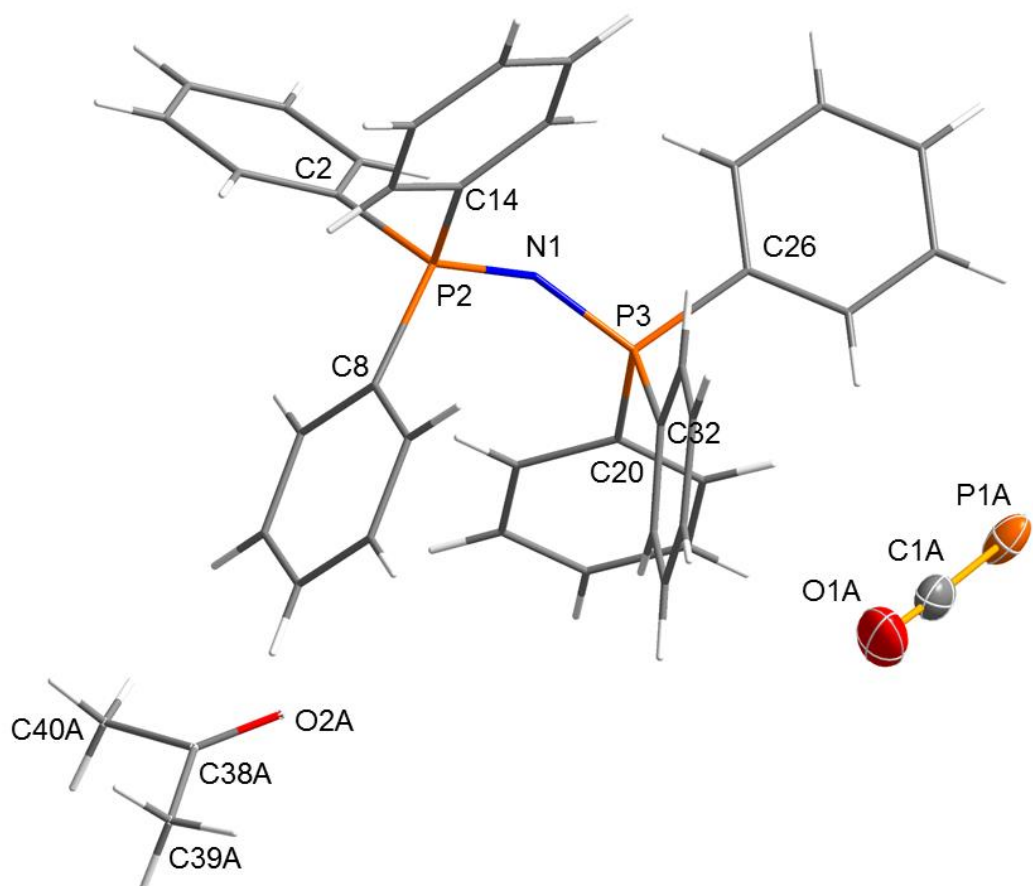

**Figure S11.** Representation of the molecular structure of an ion pair in the crystal structure of **5**. Probability of thermal ellipsoids are set at 50 % at 173 K. Disorder is not shown for reasons of clarity.

### 3 Experimental Description

#### 3.1 Starting material synthesis

##### 3.1.1 Synthesis of [PPN]N<sub>3</sub>

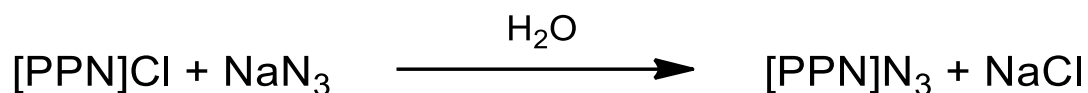

[PPN]Cl (1.5 g, 2.61 mmol) was dissolved in 11 mL hot water (80 °C). An aqueous solution (5 mL) of NaN<sub>3</sub> (0.34 g, 5.22 mmol, 2 eq.) was added dropwise which immediately resulted in formation of a precipitate of the [PPN]N<sub>3</sub>. The suspension was cooled for 30 min to 0 °C with an ice bath and then filtered with a frit (G3). The solid was washed with water (4 x 60 mL) and dried (80 °C, 1·10<sup>-3</sup> bar, 3 h). Finally, the salt was dissolved in acetone (ca. 20 mL), filtered (G3 frit) and crystallized from a concentrated solution. The crystals were collected by filtration (G3 frit) and dried (80 °C, 1·10<sup>-3</sup> bar, 6 h) leading to colorless [PPN]N<sub>3</sub> (1.24 g, 2.13 mmol) in yields of 82 %.

C<sub>36</sub>H<sub>30</sub>N<sub>4</sub>P<sub>2</sub> (580.60 g/mol): **m.p.** = 213 °C, **dec.** = 315 °C. **EA** found (calc.) %: C 73.78 (74.47); H 5.41 (5.21); 9.59 (9.65). **<sup>1</sup>H NMR** (297 K, CD<sub>3</sub>CN, 250.13 MHz): δ = 7.74 – 7.41 (m, 30 H, Ph-*H*). **<sup>13</sup>C{<sup>1</sup>H} NMR** (297 K, CD<sub>3</sub>CN, 62.9 MHz): δ = 134.8 – 134.5 (m, *p*-C); 133.6 – 133.1 (m, *m*-C); 130.7 – 130.2 (m, *o*-C); 128.1 (dd, *i*-C, <sup>1</sup>*J*(<sup>13</sup>C–<sup>31</sup>P) = 127 Hz, <sup>3</sup>*J*(<sup>13</sup>C–<sup>31</sup>P) = 2 Hz). **<sup>39</sup>P{<sup>1</sup>H} NMR** (297 K, CD<sub>3</sub>CN, 101.26 MHz): δ = 20.8 (s, *P*). **IR** (25 °C, ATR, 32 scans, cm<sup>-1</sup>)  $\tilde{\nu}$  = 439 (M), 451 (M), 460 (M), 495 (VS), 532 (VS), 548 (S), 616 (W), 631 (W), 690 (S), 721 (S), 748 (M), 758 (M), 802 (W), 857 (W), 929 (W), 948 (W), 995 (M), 1024 (W), 1111 (S), 1160 (W), 1183 (M), 1261 (S), 1284 (M), 1333 (W), 1434 (M), 1482 (W), 1574 (W), 1587 (W), 1989 (S), 2003 (M), 2959 (W), 2988 (W), 3006 (W), 3050 (W), 3077 (W), 3278 (W), 3295 (W). **Raman** (laser: 633 nm, accumulation time: 8 s ,20 scans, 298 K, cm<sup>-1</sup>)  $\tilde{\nu}$  = 171 (3), 183 (2), 193 (1), 205 (1), 225 (2), 234 (2), 244 (2), 255 (3), 267 (4), 283 (1), 327 (1), 365 (1), 395 (1), 434 (1), 445 (1), 492 (1), 524 (1), 549 (1), 615 (3), 665 (4), 728 (1), 804 (1), 848 (1), 922 (1), 939 (1), 975 (1), 999 (10), 1025 (2), 1032 (4), 1068 (1), 1111 (4), 1164 (1), 1170 (1), 1182 (1), 1191 (1), 1243 (1), 1271 (1), 1323 (2), 1440 (1), 1480



(1), 1575 (2), 1589 (5), 2959 (1), 3007 (1), 3038 (1), 3058 (2), 3066 (3), 3096 (1), 3146 (1), 3175 (1).

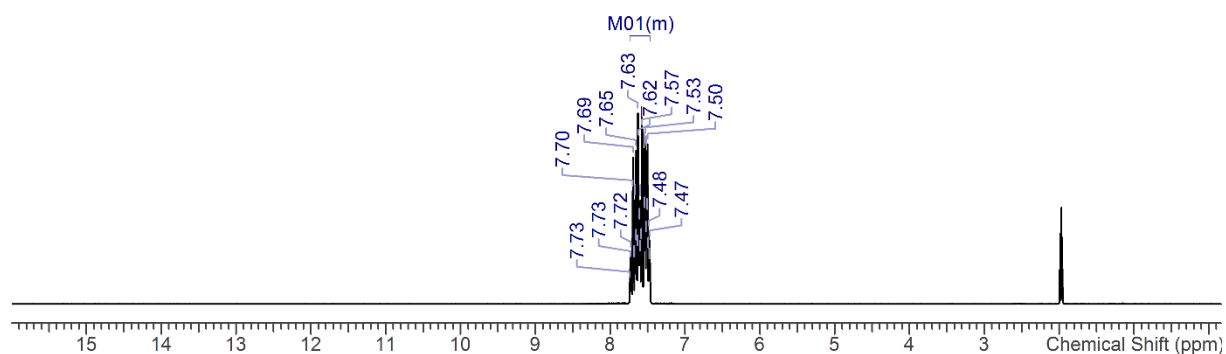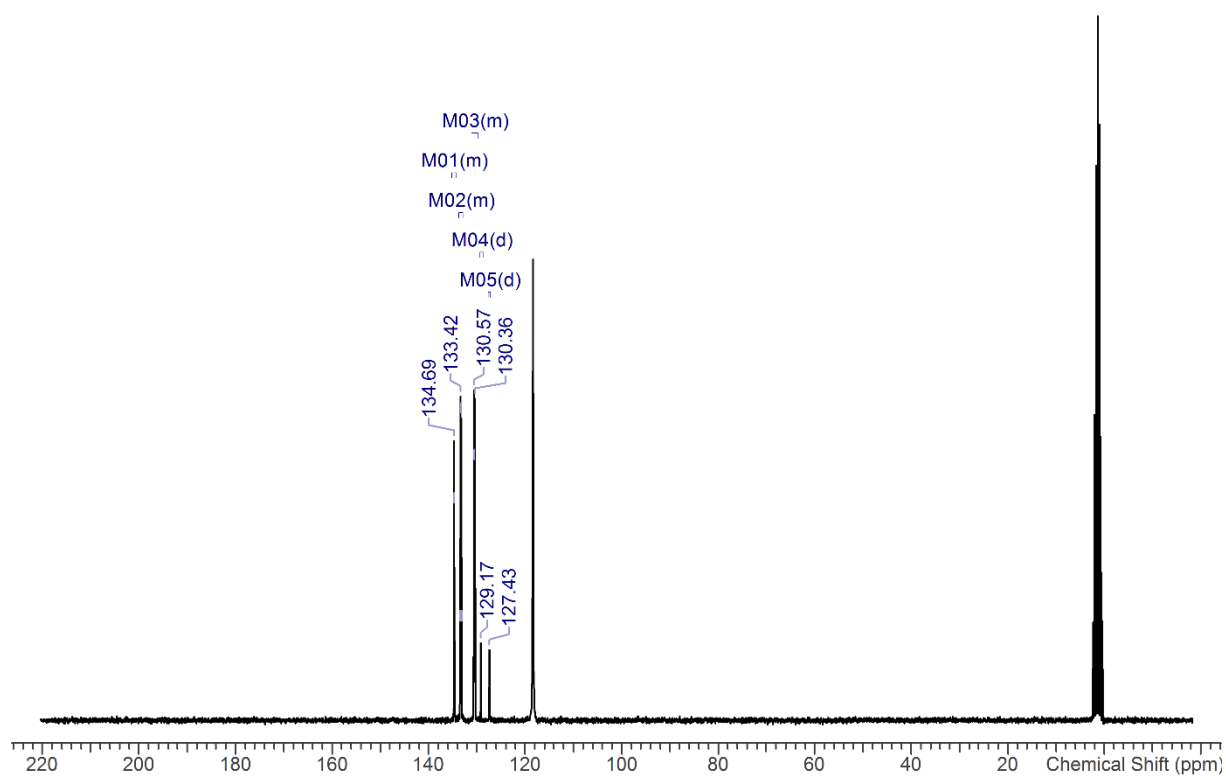

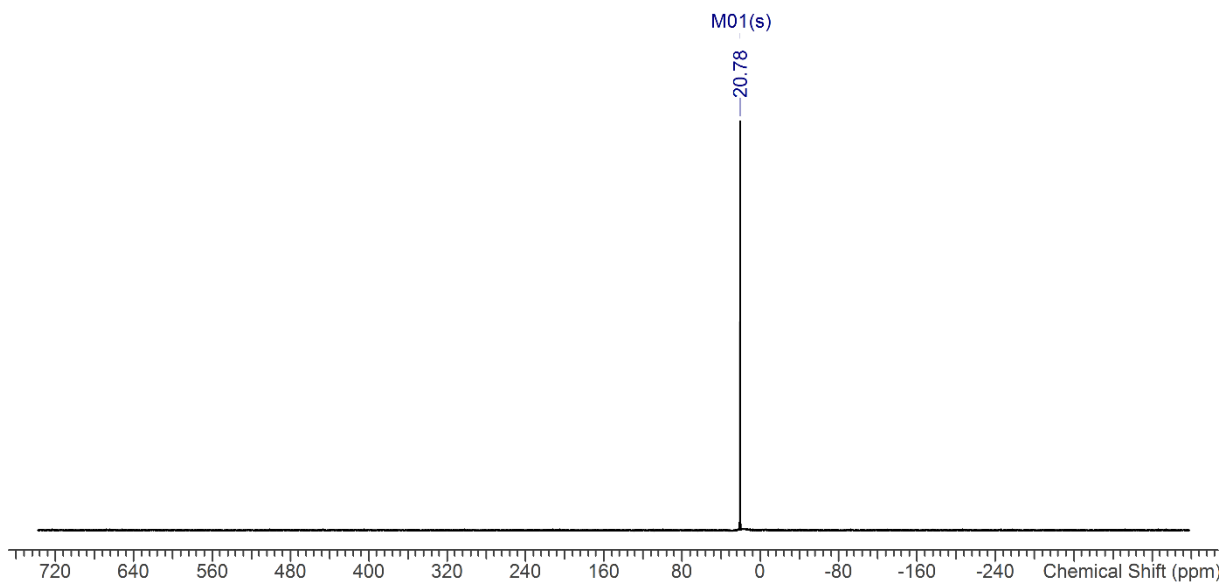

**Figure S 14.**  $^{31}\text{P}\{^1\text{H}\}$  NMR of  $[\text{PPN}]\text{N}_3$ .

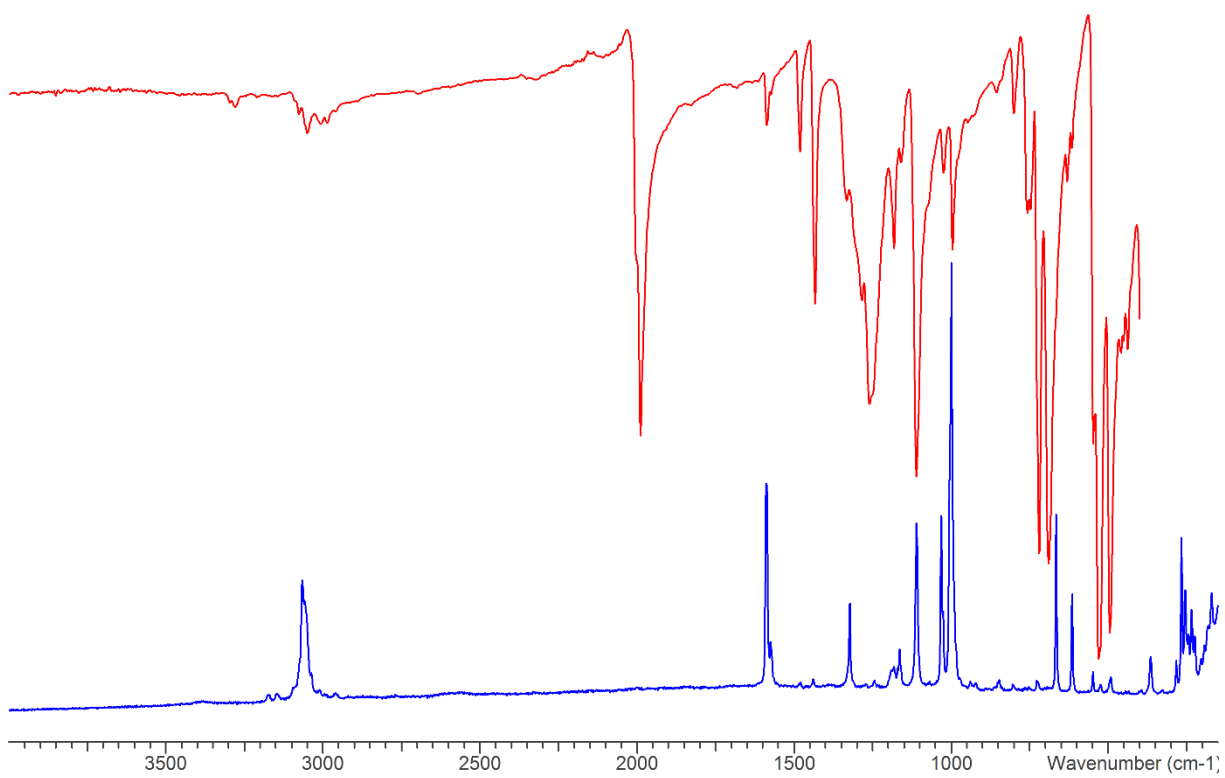

**Figure S 15.** IR (red) and Raman (blue) spectra of  $[\text{PPN}]\text{N}_3$ .

### 3.1.2 Synthesis of [PPN]OCN

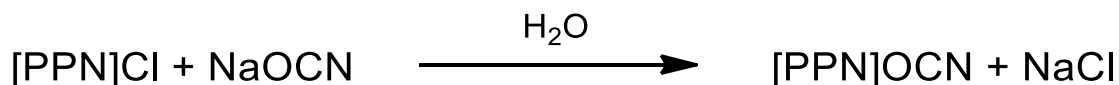

[PPN]Cl (1.5 g, 2.61 mmol) was dissolved in 11 mL hot water (80 °C). An aqueous solution (7 mL) of NaOCN (0.51 g, 7.83 mmol, 3 eq.) was added dropwise which immediately resulted in formation of a precipitate of the [PPN]OCN. The suspension was cooled for 30 min to 0 °C with an ice bath and then filtered with a frit (G3). The solid was washed with water (4 x 60 mL) and dried (80 °C, 1·10<sup>-3</sup> bar, 3 h). Finally, the salt was dissolved in acetone (ca. 20 mL), filtered (G3 frit) and crystallized from a concentrated solution. The crystals were collected by filtration (G3 frit) and dried (80 °C, 1·10<sup>-3</sup> bar, 6 h) leading to colorless [PPN]OCN (1.16 g, 1.99 mmol) in yields of 76 %.

C<sub>37</sub>H<sub>30</sub>N<sub>2</sub>OP<sub>3</sub> (580.59 g/mol): **m.p.** = 217 °C, **dec.** = 295 °C. **EA** found (calc.) %: C 76.75 (76.54); H 5.08 (5.21); 4.50 (4.82). **<sup>1</sup>H NMR** (297 K, CD<sub>3</sub>CN, 300.13 MHz): δ = 7.74 – 7.41 (m, 30 H, Ph-*H*). **<sup>13</sup>C{<sup>1</sup>H} NMR** (297 K, CD<sub>3</sub>CN, 62.90 MHz): δ = 134.7 – 134.6 (m, *p*-C); 133.5 – 133.1 (m, *m*-C); 130.7 – 130.2 (m, *o*-C); 128.1 (dd, *i*-C, <sup>1</sup>*J*(<sup>13</sup>C–<sup>31</sup>P) = 127 Hz, <sup>3</sup>*J*(<sup>13</sup>C–<sup>31</sup>P) = 2 Hz). **<sup>39</sup>P{<sup>1</sup>H} NMR** (297 K, CD<sub>3</sub>CN, 101.27 MHz): δ = 20.8 (s, *P*). **IR** (25 °C, ATR, 16 scans, cm<sup>-1</sup>)  $\tilde{\nu}$  = 443 (M), 457 (M), 495 (VS), 532 (VS), 620 (M), 688 (S), 721 (S), 744 (W), 764 (W), 795 (W), 841 (VW), 925 (VW), 948 (W), 995 (M), 1026 (W), 1113 (S), 1162 (W), 1185 (W), 1265 (M), 1294 (M), 1436 (M), 1482 (W), 1587 (W), 1673 (VW), 1904 (VW), 2133 (M), 2990 (W), 3019 (W), 3054 (W), 3074 (W), 3309 (VW), 3394 (VW). **Raman** (laser: 633 nm, accumulation time: 8 s, 20 scans, 298 K, cm<sup>-1</sup>)  $\tilde{\nu}$  = 172 (1), 189 (1), 199 (1), 222 (2), 232 (2), 248 (2), 268 (2), 281 (1), 300 (1), 325 (1), 367 (1), 386 (1), 395 (1), 407 (1), 444 (1), 458 (1), 488 (1), 497 (1), 526 (1), 534 (1), 547 (1), 615 (2), 664 (5), 689 (1), 696 (1), 702 (1), 723 (1), 729 (1), 741 (1), 768 (1), 797 (1), 851 (1), 869 (1), 935 (1), 947 (1), 1000 (10), 1021 (2), 1029 (4), 1072 (1), 1110 (4), 1153 (1), 1161 (1), 1181 (1), 1188 (1), 1194 (1), 1272 (1), 1280 (1), 1295 (1), 1323 (1), 1439 (1), 1486 (1), 1575 (1), 1589 (4), 2124 (1), 2134 (2), 2142 (1), 2959 (1), 2992 (1), 3010 (1), 3029 (1), 3049 (2), 3055 (3), 3060 (3), 3070 (2), 3092 (1), 3148 (1), 3174 (1).

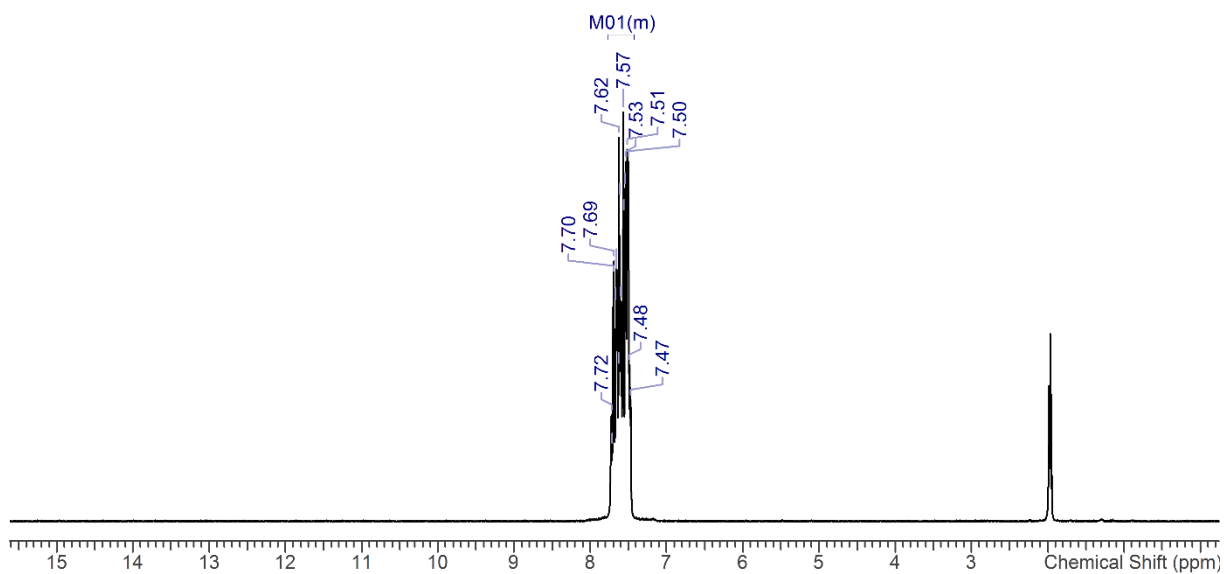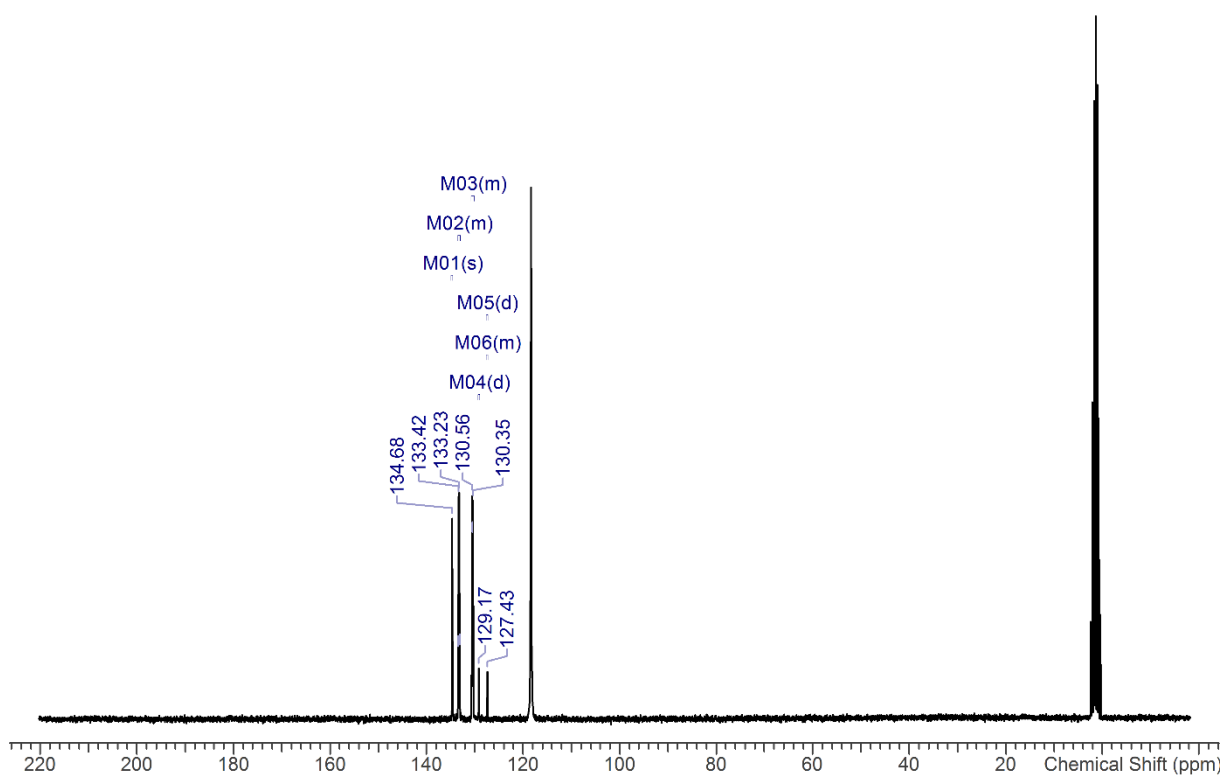

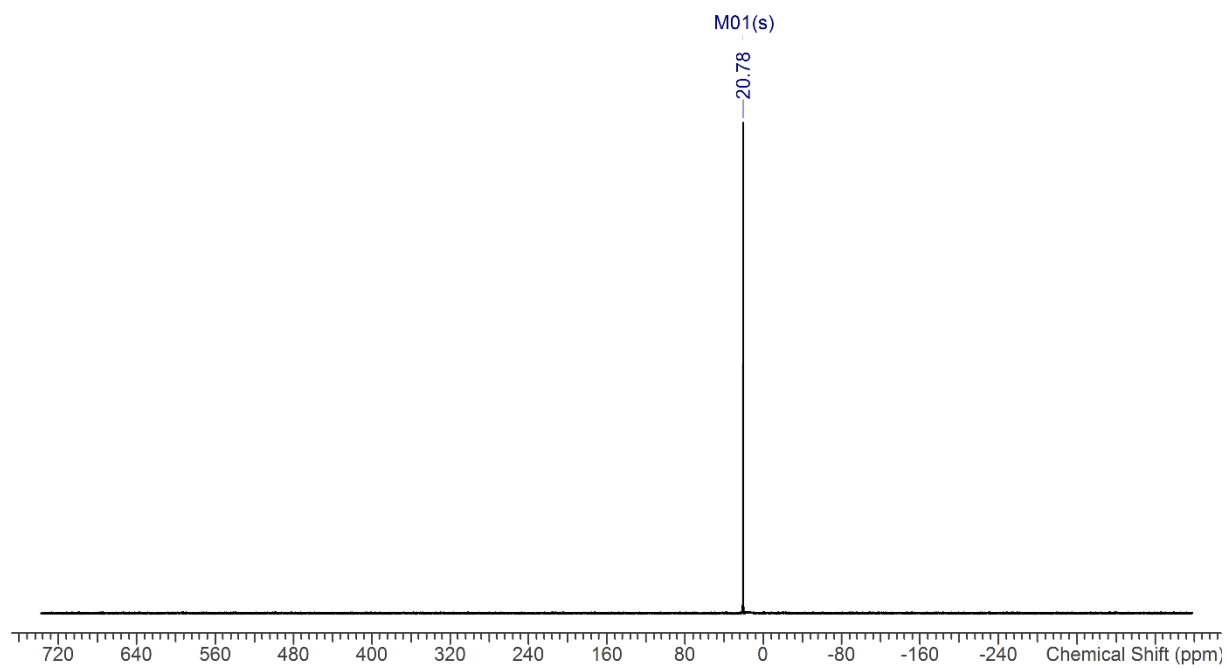

**Figure S 18.**  $^{31}\text{P}\{^1\text{H}\}$  NMR of [PPN]OCN.

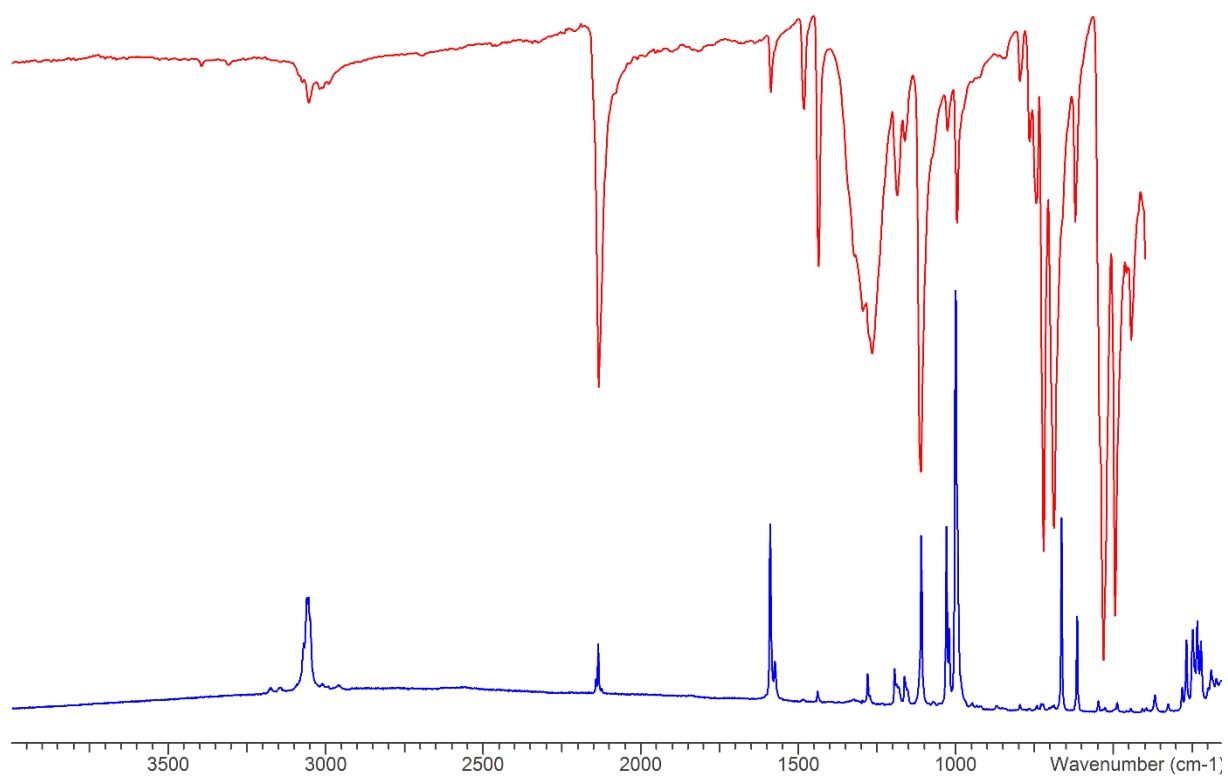

**Figure S 19.** IR (red) and Raman (blue) spectra of [PPN]OCN.

### 3.1.3 Synthesis of [PPN]SCN

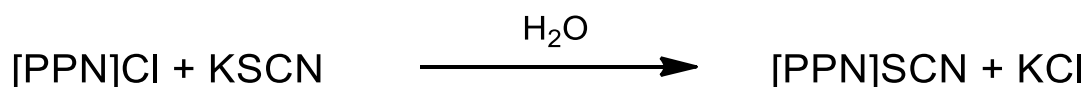

[PPN]Cl (2.0 g, 3.49 mmol) was dissolved in 20 mL hot water (80 °C). An aqueous solution (5 mL) of KSCN (0.67 g, 6.95 mmol, 2 eq.) was added dropwise which immediately resulted in formation of a precipitate of the [PPN]SCN. The suspension was cooled for 30 min to 0 °C with an ice bath and then filtered with a frit. The solid was washed with water (3 x 40 mL) and dried (80 °C,  $1 \cdot 10^{-3}$  bar, 3 h). Finally, the salt was dissolved in acetone (ca. 20 mL), filtered (G3 frit) and crystallized from a concentrated solution. The crystals were collected by filtration (G3 frit) and dried (80 °C,  $1 \cdot 10^{-3}$  bar, 6 h) leading to colorless [PPN]SCN (1.30 g, 2.18 mmol) in yields of 62 %.

$\text{C}_{37}\text{H}_{30}\text{N}_2\text{P}_2\text{S}$  (586.66 g/mol): **m.p.** = 196 °C, **dec.** = 355 °C. **EA** found (calc.) %: C 74.64 (74.48); H 5.05 (5.07); 4.41 (4.70); S 5.19 (5.37).  **$^1\text{H}$  NMR** (297 K,  $\text{CD}_3\text{CN}$ , 300.13 MHz):  $\delta$  = 7.74 – 7.41 (m, 30 H, Ph-*H*).  **$^{13}\text{C}\{^1\text{H}\}$  NMR** (297 K,  $\text{CD}_3\text{CN}$ , 62.90 MHz):  $\delta$  = 134.7 – 134.6 (m, *p*-C); 133.5 – 133.1 (m, *m*-C); 130.7 – 130.2 (m, *o*-C); 128.1 (dd, *i*-C,  $^1J(^{13}\text{C}-^{31}\text{P}) = 127$  Hz,  $^3J(^{13}\text{C}-^{31}\text{P}) = 2$  Hz).  **$^{39}\text{P}\{^1\text{H}\}$  NMR** (297 K,  $\text{CD}_3\text{CN}$ , 101.27 MHz):  $\delta$  = 20.8 (s, *P*). **IR** (25 °C, ATR, 16 scans,  $\text{cm}^{-1}$ )  $\tilde{\nu}$  = 433 (M), 457 (M), 490 (VS), 528 (VS), 546 (S), 616 (W), 686 (S), 701 (M), 719 (S), 740 (M), 764 (M), 795 (W), 868 (VW), 923 (W), 995 (M), 1024 (W), 1076 (W), 1111 (S), 1179 (W), 1267 (M), 1286 (M), 1300 (S), 1319 (M), 1434 (M), 1482 (W), 1574 (W), 1587 (W), 1681 (VW), 1805 (VW), 2005 (W), 2050 (M), 2971 (W), 2988 (W), 3013 (W), 3058 (W), 3074 (W), 3087 (W), 3173 (W), 3287 (W). **Raman** (laser: 633 nm, accumulation time: 4 s, 20 scans, 298 K,  $\text{cm}^{-1}$ )  $\tilde{\nu}$  = 179 (2), 191 (2), 200 (1), 223 (2), 233 (3), 251 (2), 266 (3), 279 (1), 361 (1), 486 (1), 492 (1), 526 (1), 543 (1), 550 (1), 614 (3), 662 (3), 691 (1), 723 (1), 729 (1), 737 (1), 756 (1), 762 (1), 792 (1), 861 (1), 924 (1), 939 (1), 999 (10), 1026 (5), 1044 (1), 1054 (1), 1069 (1), 1108 (4), 1153 (1), 1160 (1), 1180 (2), 1192 (1), 1312 (1), 1315 (1), 1338 (1), 1437 (1), 1442 (1), 1480 (1), 1574 (2), 1587 (5), 2052 (2), 2960 (0), 2972 (0), 2990 (0), 3011 (0), 3019 (0), 3057 (3), 3145 (0), 3171 (0).

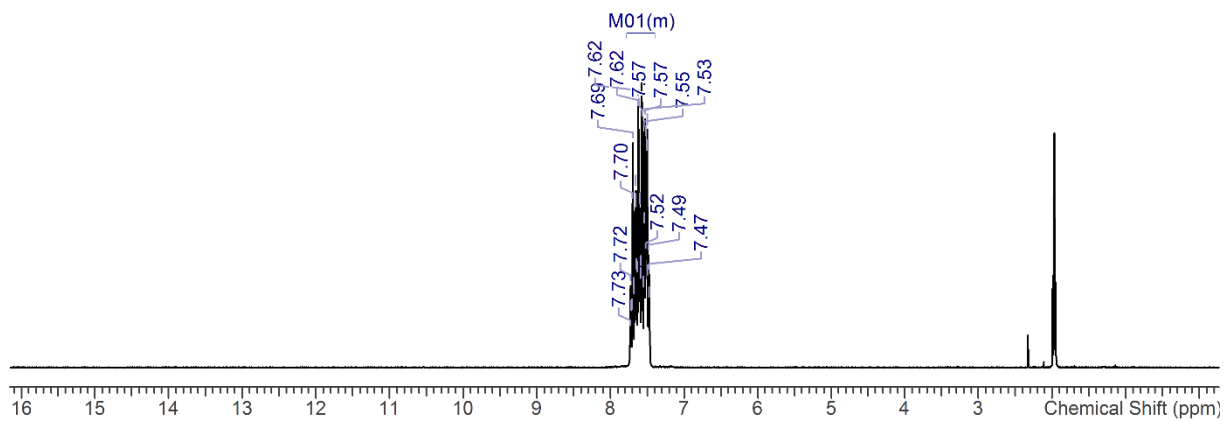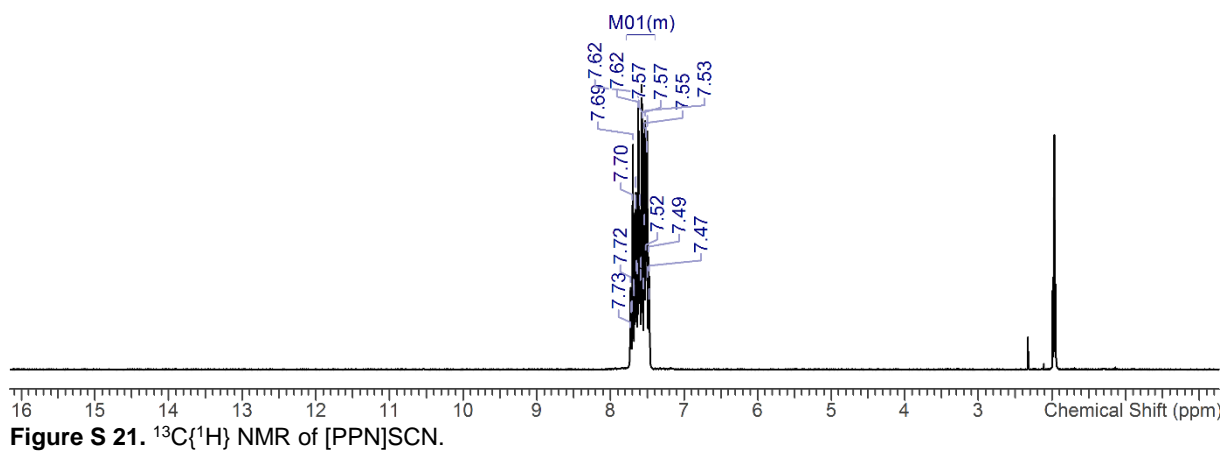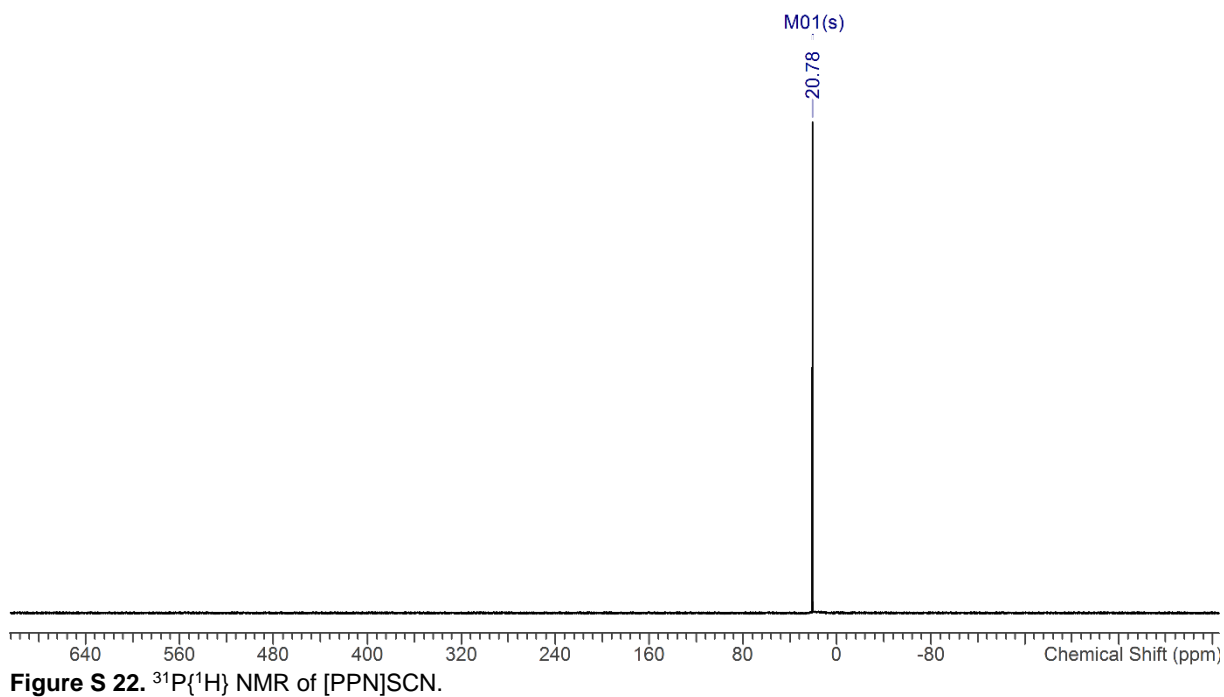

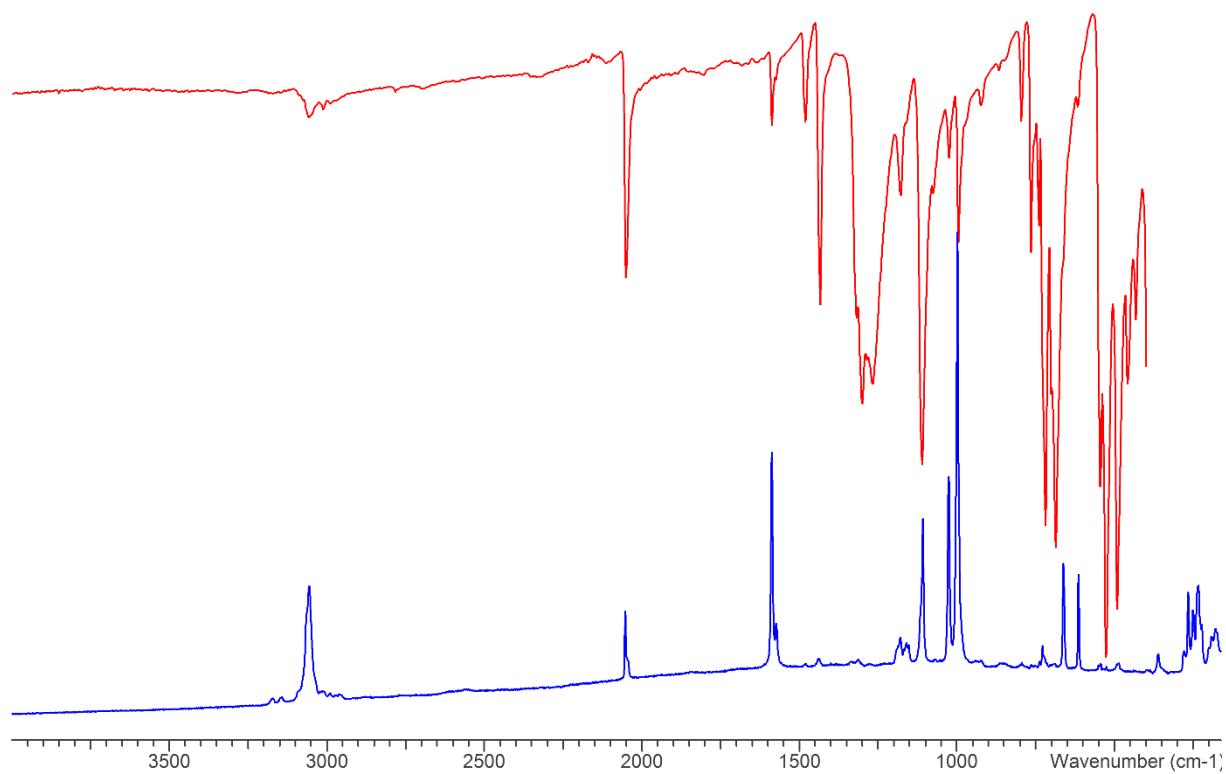

**Figure S 23.** IR (red) and Raman (blue) spectra of [PPN]SCN.



### 3.1.4 Synthesis of [PPN]OCP·(CH<sub>3</sub>)<sub>2</sub>CO

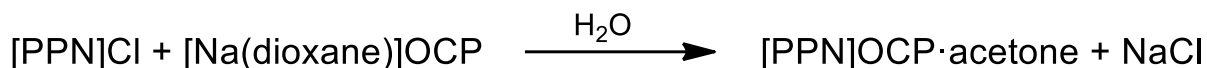

$\mu$ -Nitrido-bis(triphenylphosphane) chloride [PPN]Cl (1.13 g, 1.97 mmol) was placed in a round bottom flask and was dissolved in 10 mL of hot water (80 °C). NaOCP·0.4dioxane (0.30 g, 2.57 mmol) was suspended in 25 mL of water. The suspension was added quickly within one minute, since decomposition of PCO<sup>-</sup> is quickly progressing. As soon as the sodium salt is added, a shiny colorless precipitate was formed which is filtered off with a frit (G3) and washed with water (5 x 60 mL; water from the last fraction was tested with AgNO<sub>3</sub> for chloride impurities). The colorless solid was transferred into a Schlenk vessel and dried (60 °C, 1·10<sup>-3</sup> mbar, 10 h). The solution turns brownish when 20 mL of acetone was added and minor amounts of a precipitate was formed which was filtered off (G3 frit). Due to fractionalized crystallization of a concentrated solution, [PPN]OCP·(CH<sub>3</sub>)<sub>2</sub>CO (0.50 g, 0.76 mmol) was obtained in yields of 39 %.

C<sub>40</sub>H<sub>36</sub>NO<sub>2</sub>P<sub>3</sub> (655.64 g/mol): **m.p.** = 189 °C. **EA** found (calc.) %: C 73.75 (73.28); H 4.63 (5.55); 2.75 (2.14). **<sup>1</sup>H NMR** (297 K, CD<sub>3</sub>CN, 300.13 MHz):  $\delta$  = 7.74 – 7.41 (m, 30 H, Ph-*H*). **<sup>13</sup>C{<sup>1</sup>H} NMR** (297 K, CD<sub>3</sub>CN, 62.90 MHz):  $\delta$  = 134.7 – 134.6 (m, *p*-C); 133.5 – 133.1 (m, *m*-C); 130.7 – 130.2 (m, *o*-C); 128.1 (dd, *i*-C, <sup>1</sup>*J*(<sup>13</sup>C–<sup>31</sup>P) = 127 Hz, <sup>3</sup>*J*(<sup>13</sup>C–<sup>31</sup>P) = 2 Hz). **<sup>39</sup>P{<sup>1</sup>H} NMR** (297 K, CD<sub>3</sub>CN, 101.27 MHz):  $\delta$  = 20.8 (s, *P*, [PPN]<sup>+</sup>), –391.1 (s, *P*, OCP<sup>-</sup>) **IR** (25 °C, ATR, 16 scans, cm<sup>-1</sup>)  $\tilde{\nu}$  = 441 (M), 455 (M), 495 (VS), 528 (VS), 546 (S), 616 (W), 688 (VS), 721 (S), 744 (M), 758 (W), 797 (W), 851 (W), 896 (W), 938 (W), 995 (M), 1022 (M), 1111 (S), 1160 (M), 1181 (M), 1222 (M), 1257 (M), 1282 (M), 1358 (W), 1434 (M), 1480 (W), 1574 (W), 1587 (W), 1616 (W), 1708 (M), 1768 (M), 1791 (M), 2988 (W), 3021 (W), 3052 (W). **Raman** (laser: 633 nm, accumulation time: 8 s, 20 scans, 298 K, cm<sup>-1</sup>)  $\tilde{\nu}$  = 187 (2), 201 (2), 231 (3), 247 (2), 264 (2), 279 (2), 362 (2), 486 (2), 496 (2), 527 (1), 615 (3), 663 (5), 723 (2), 792 (2), 797 (4), 849 (2), 999 (10), 1026 (4), 1107 (4), 1159 (2), 1181 (2), 1437 (2), 1479 (2), 1572 (3), 1586 (5), 1709 (2), 1776 (3), 1794 (4), 2913 (1), 2952 (1), 2988 (1), 3008 (1), 3058 (3), 3143 (1), 3172 (1).

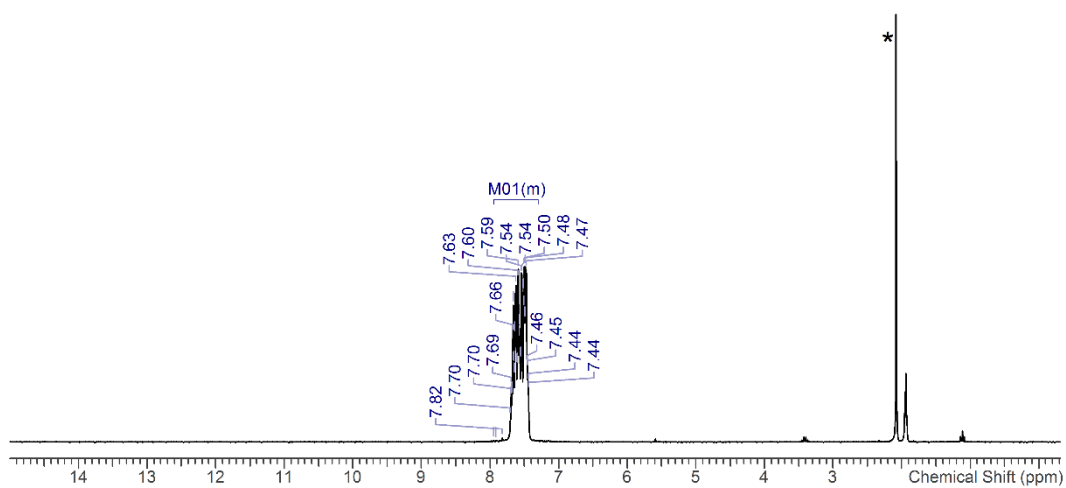

Figure S 24.  $^1\text{H}$  NMR of  $[\text{PPN}]\text{OCP}\cdot(\text{CH}_3)_2\text{CO}$ .

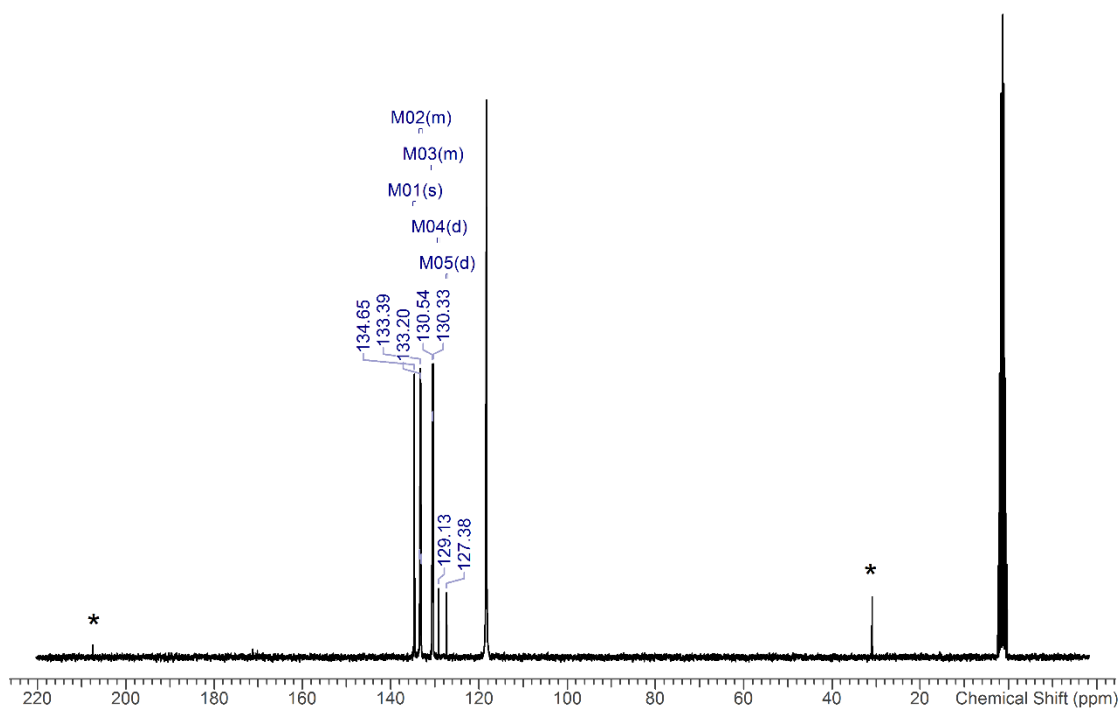

Figure S 25.  $^{13}\text{C}\{^1\text{H}\}$  NMR of  $[\text{PPN}]\text{OCP}\cdot(\text{CH}_3)_2\text{CO}$ .

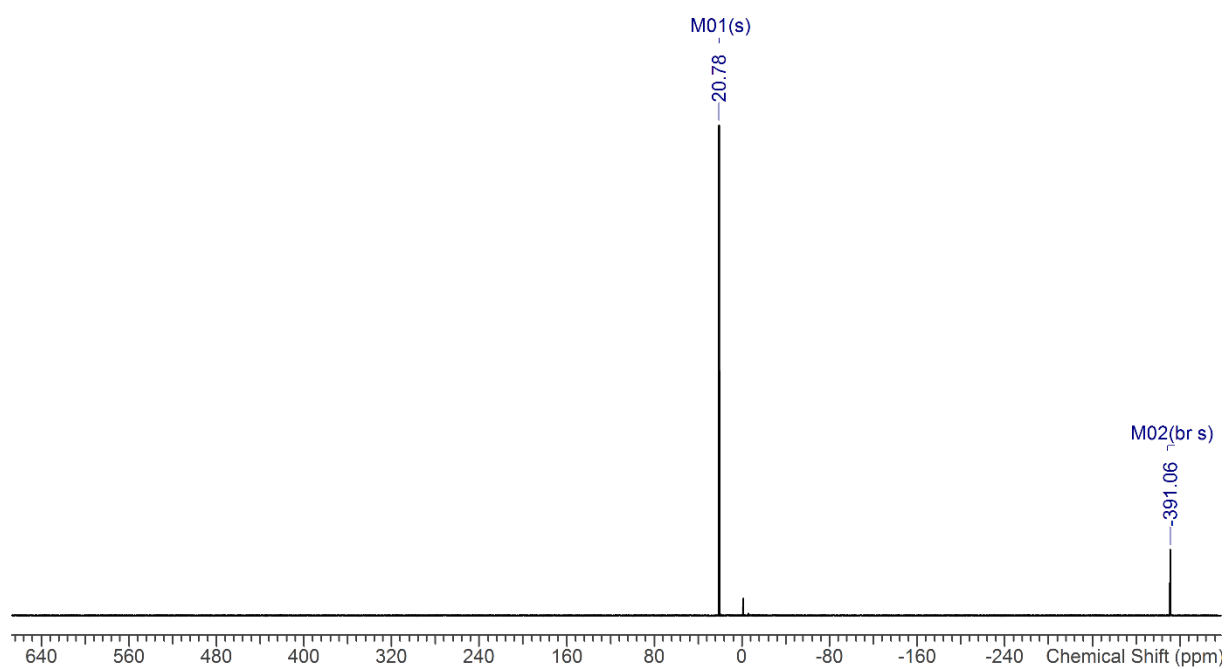

**Figure S 26.**  $^{31}\text{P}\{^1\text{H}\}$  NMR of  $[\text{PPN}]\text{OCP}\cdot(\text{CH}_3)_2\text{CO}$ .

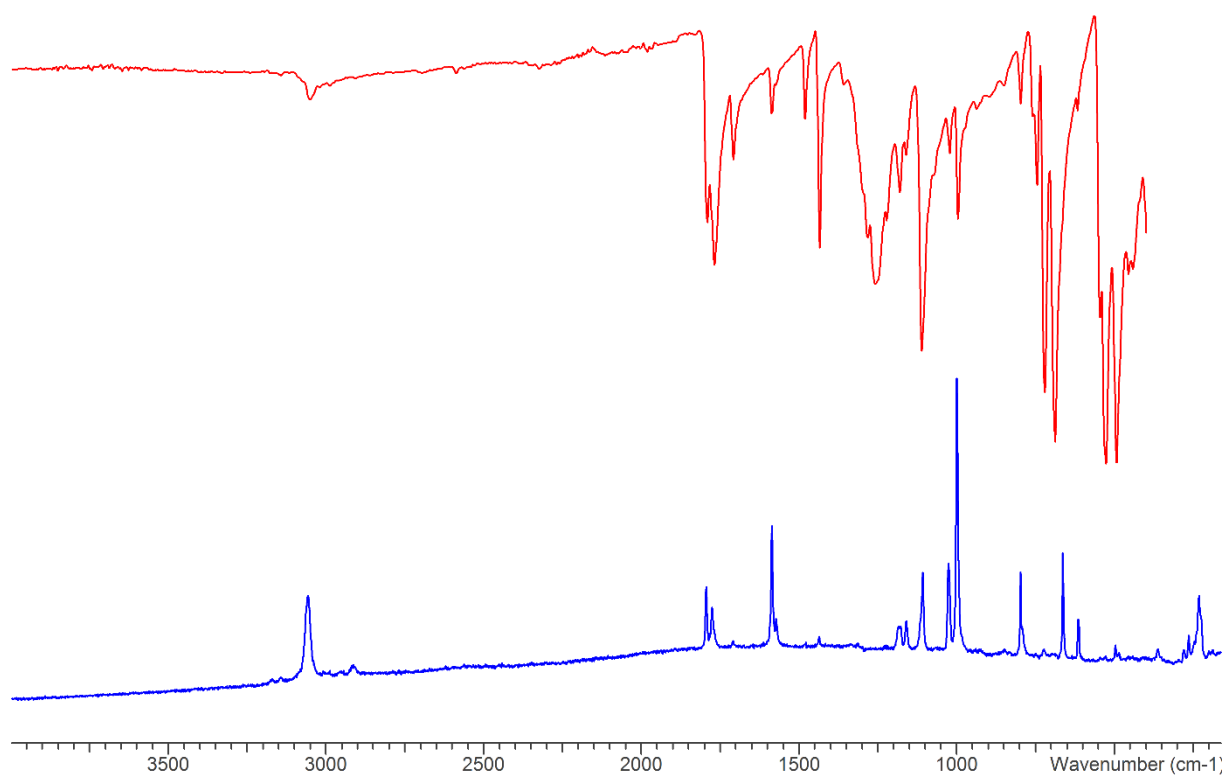

**Figure S 27.** IR (red) and Raman (blue) spectra of  $[\text{PPN}]\text{OCP}\cdot(\text{CH}_3)_2\text{CO}$ .

## 3.2 Product synthesis

*General annotation: It was not possible to obtain further analytical data like NMR since all obtained HCN solvates were found to be unstable with respect to solvents. Additionally, no IR or EA could be obtained since crystallization was achieved at low-temperatures in Fomblin YR-1800 perfluoropolyether and the solvates were found to be unstable at room temperature (loss of HCN or polymerization). The same applies to the determination of the yield.*

### 3.2.1 Synthesis of [PPN][X(HCN)<sub>n</sub>] salts

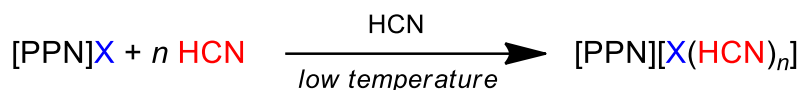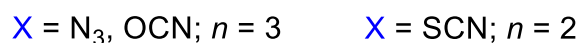

#### 3.2.1.1 Synthesis of [PPN][N<sub>3</sub>(HCN)<sub>3</sub>] (1)

[PPN]N<sub>3</sub> (0.1 g, 0.17 mmol, 1 eq.) was placed in a Schlenk tube which was cooled to 0 °C afterwards. 120 μL of HCN (80 mg, 2.9 mmol, 17 eq.) which was cooled to 0 °C was transferred onto the salt via a pre-cooled syringe. The mixture was shaken rapidly until complete dissolution of the salt was noticed. During the whole process the liquid remained colorless. Several attempts to obtain crystals by cooling the mixture slowly to -21 °C did not lead to crystallization. However, at -22 °C the liquid started to solidify slowly. **Small** amounts of the solid were transferred to a self-build low-temperature mounting station for crystal picking, which was cooled to -60 °C. Under the microscope evolving gas was observed (subliming HCN). The amount of the colorless solid started to reduce and after one minute colorless crystals were formed. X-ray analysis revealed the formation of [PPN][N<sub>3</sub>(HCN)<sub>3</sub>] (1).

C<sub>39</sub>H<sub>33</sub>N<sub>7</sub>P<sub>2</sub> (661.66 g/mol): **Raman** (laser: 633 nm, accumulation time: 6 s ,20 scans, 225 K, cm<sup>-1</sup>)  $\tilde{\nu} = 169$  (1), 187 (1), 204 (1), 222 (1), 239 (2), 250 (1), 254 (1), 268 (1), 283 (1), 309 (1), 335 (1), 365 (1), 390 (1), 399 (1), 489 (1), 526 (1), 534 (1), 551 (1), 615 (2), 626 (1), 667 (3), 694 (1), 697 (1), 725 (1), 729 (1), 747 (1), 757 (1), 806 (1), 842 (1), 856 (1), 930 (1), 973 (1), 1001 (10), 1027 (4), 1054 (1), 1073 (1), 1090 (1),

1113 (3), 1159 (1), 1165 (1), 1183 (1), 1191 (1), 1230 (1), 1242 (1), 1246 (1), 1275 (1), 1286 (1), 1315 (1), 1322 (1), 1332 (1), 1435 (1), 1440 (1), 1481 (1), 1576 (1), 1588 (4), 2056 (1), 2067 (2), 2077 (1), 2958 (1), 2993 (1), 3013 (1), 3023 (1), 3028 (1), 3061 (3), 3143 (1), 3149 (1), 3178 (1).

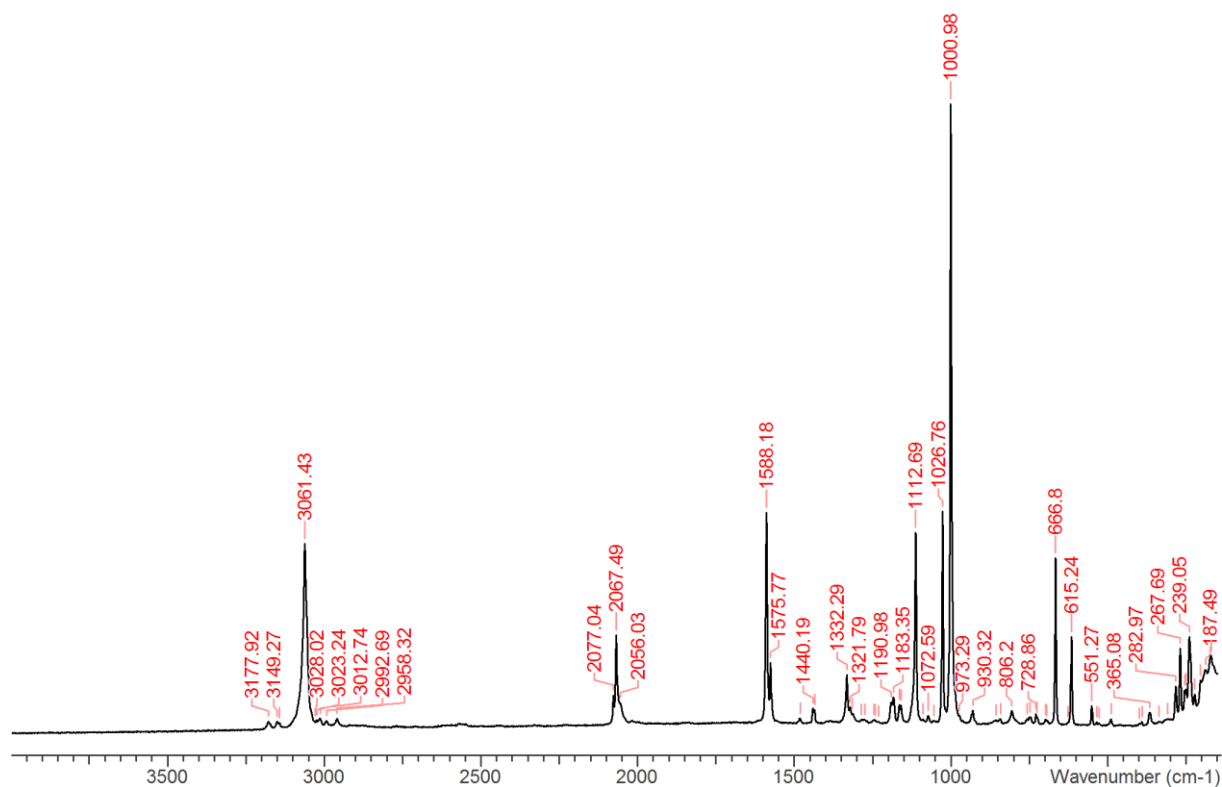

Figure S28. Raman spectrum of 1.

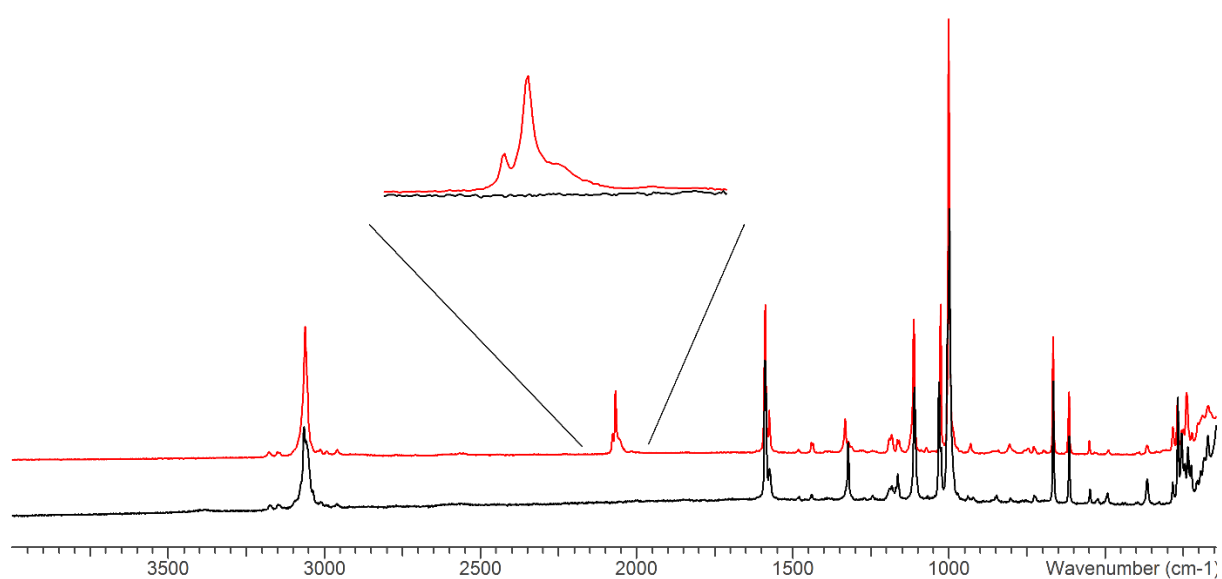

Figure S 29. Raman spectra of 1 (red) and reference material [PPN]N<sub>3</sub> (black) for comparison.

### 3.2.1.2 Synthesis of [PPN][OCN(HCN)<sub>3</sub>] (2)

[PPN]OCN (0.2 g, 0.34 mmol, 1 eq.) was placed in a Schlenk tube which was cooled to 0 °C afterwards. 250 µL of HCN (170 mg, 6.29 mmol, 19 eq.) which was cooled to 0 °C was transferred onto the salt via a pre-cooled syringe. The mixture was shaken rapidly until complete dissolution of the salt was noticed. The solution started to change in color (yellowish to brown) which was fast progressing even at low temperatures with accompanying increase in viscosity. Several attempts to obtain crystals by cooling the mixture slowly to -21 °C did not lead to crystallization. However, at -22 °C the liquid started to solidify slowly. **Small** amounts of the solid were transferred to a self-build low-temperature mounting station for crystal picking, which was cooled to -60 °C. Under the microscope evolving gas was observed (subliming HCN). The amount of the colorless solid started to reduce and after one minute colorless crystals were formed. X-ray analysis revealed the formation of [PPN][OCN(HCN)<sub>3</sub>] (2).

C<sub>40</sub>H<sub>33</sub>N<sub>5</sub>P<sub>2</sub>O (661.65 g/mol): **Raman** (laser: 633 nm, accumulation time: 4 s ,20 scans, 225 K, cm<sup>-1</sup>)  $\tilde{\nu} = 157 (1), 169 (2), 183 (1), 202 (1), 220 (1), 237 (2), 248 (1), 252 (1), 266 (2), 279 (1), 364 (1), 389 (1), 395 (1), 432 (1), 462 (1), 487 (1), 533 (1), 548 (1), 615 (2), 630 (1), 665 (4), 695 (1), 722 (1), 727 (1), 755 (1), 804 (1), 842 (1), 849 (1), 858 (1), 922 (1), 928 (1), 972 (1), 999 (10), 1015 (1), 1025 (4), 1070 (1), 1111 (3), 1159 (1), 1163 (1), 1181 (1), 1204 (1), 1252 (1), 1273 (1), 1284 (1), 1293 (1), 1312 (1), 1337 (1), 1434 (1), 1440 (1), 1482 (1), 1571 (1), 1575 (1), 1587 (4), 2060 (1), 2073 (2), 2098 (1), * 2164 (1), 2912 (1), 2958 (1), 2994 (1), 3014 (1), 3022 (1), 3039 (1), 3061 (4), 3080 (1), 3084 (1), 3142 (1), 3149 (1), 3172 (1), 3178 (1).$

\* (free HCN attached to the surface)

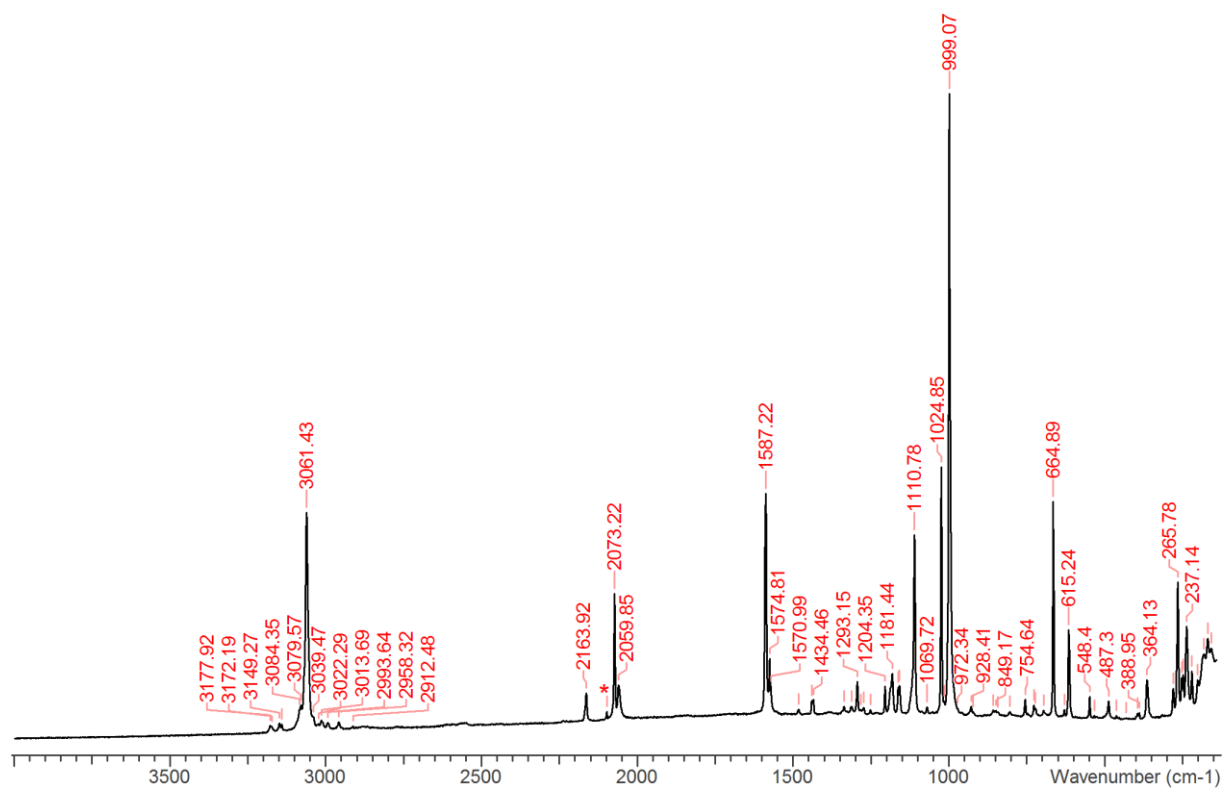

**Figure S30.** Raman spectrum of **2**. The asterisk marks attached HCN at the crystal surface.

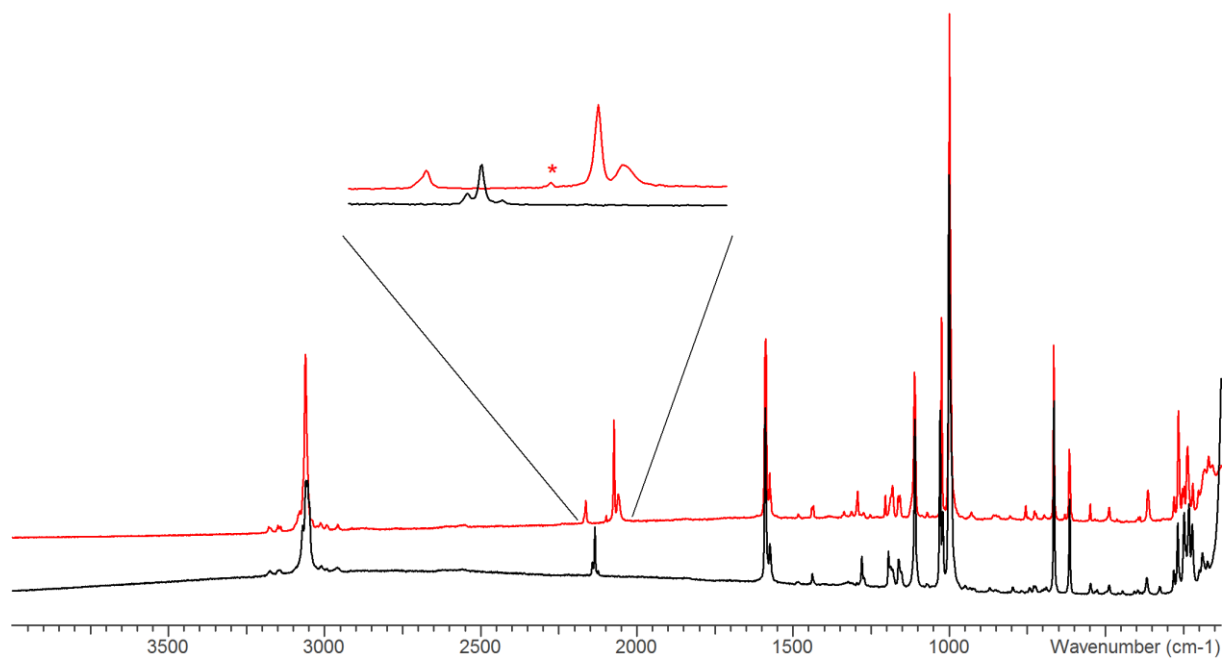

**Figure S31.** Raman spectra of **2** (red) and reference material [PPN]OCN (black) for comparison. The asterisk marks attached HCN at the crystal surface.

### 3.2.1.3 Synthesis of [PPN][SCN(HCN)<sub>2</sub>] (3)

[PPN]SCN (0.3 g, 0.49 mmol, 1 eq.) was placed in a Schlenk tube which was cooled to 0 °C afterwards. 300 µL of HCN (200 mg, 7.62 mmol, 16 eq.) which was cooled to 0 °C was transferred onto the salt via a pre-cooled syringe. The mixture was shaken rapidly until complete dissolution of the salt was noticed. The solution started to change the color to yellowish (intensified with time) which was only slowly progressing at low temperatures with accompanying increase in viscosity. Several attempts to obtain crystals by cooling the mixture slowly to -18 °C did not lead to crystallization. However, at -20 °C the liquid started to solidify slowly. **Small** amounts of the solid were transferred to a self-build low-temperature mounting station for crystal picking, which was cooled to -60 °C. Under the microscope evolving gas was observed (subliming HCN). The amount of the colorless solid started to reduce and after one minute colorless crystals were formed. X-ray analysis revealed the formation of [PPN][SCN(HCN)<sub>2</sub>] (3).

C<sub>39</sub>H<sub>32</sub>N<sub>4</sub>P<sub>2</sub>S (650.68 g/mol): **Raman** (laser: 633 nm, accumulation time: 4 s, 20 scans, 245 K, cm<sup>-1</sup>)  $\tilde{\nu}$  = 172 (1), 185 (1), 206 (1), 221 (1), 239 (2), 252 (1), 269 (1), 283 (1), 369 (1), 391 (1), 397 (1), 489 (1), 527 (1), 535 (1), 552 (1), 615 (2), 667 (3), 694 (1), 722 (1), 729 (1), 749 (1), 758 (1), 804 (1), 844 (1), 930 (1), 976 (1), 1000 (10), 1028 (4), 1076 (1), 1089 (1), 1112 (4), 1161 (1), 1182 (1), 1192 (1), 1279 (1), 1286 (1), 1315 (1), 1338 (1), 1343 (1), 1437 (1), 1442 (1), 1483 (1), 1578 (1), 1588 (3), 2051 (2), 2059 (1), 2073 (1), 2959 (1), 2996 (1), 3015 (1), 3022 (1), 3060 (2), 3073 (1), 3097 (1), 3142 (1), 3150 (1), 3153 (1), 3174 (1), 3177 (1).



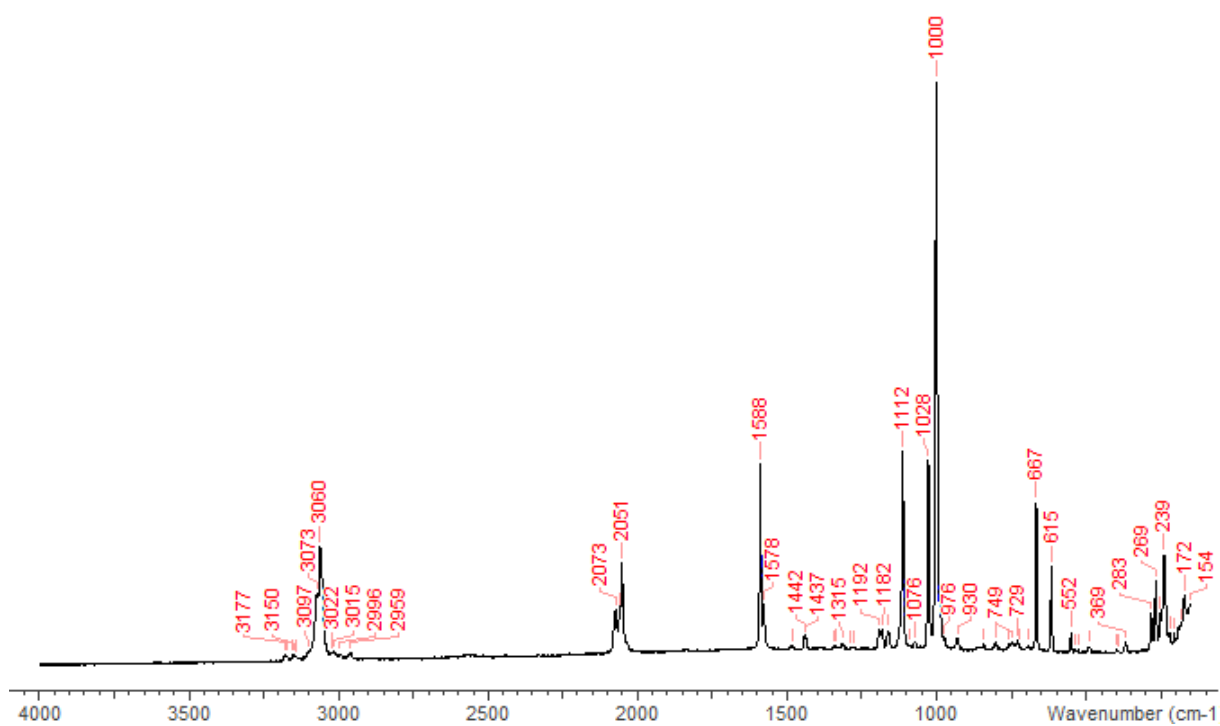

Figure S32. Raman spectrum of 3.

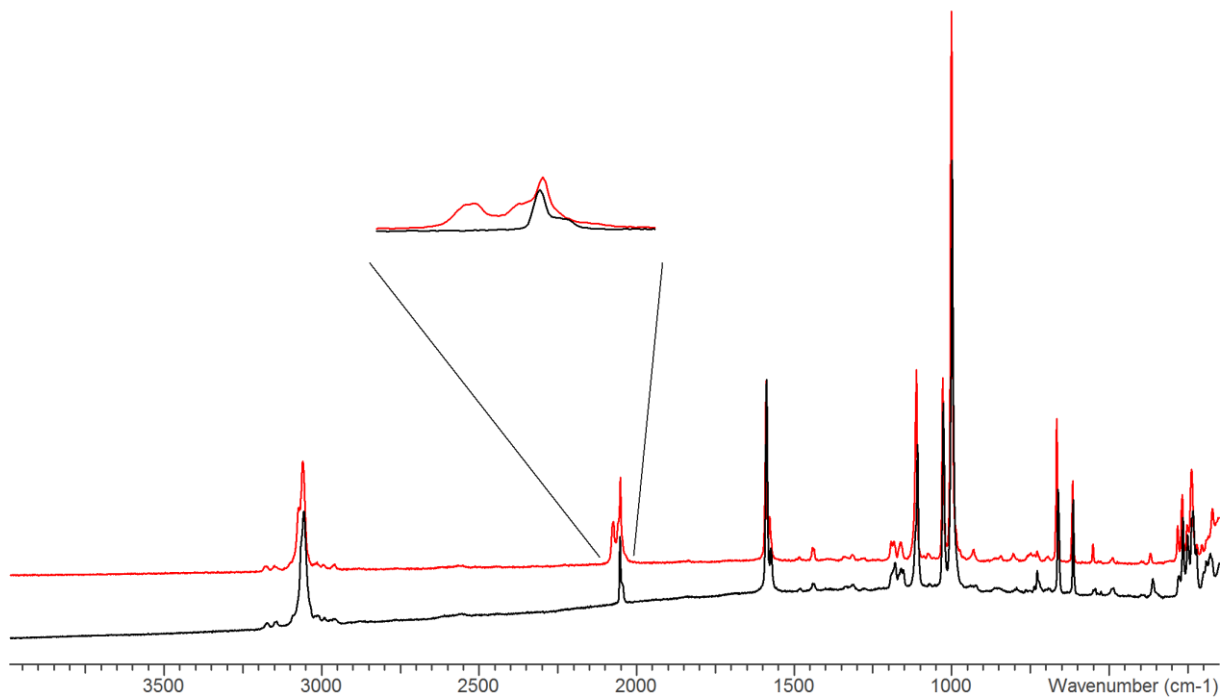

Figure S 33. Raman spectra of 3 (red) and reference material [PPN]SCN (black) for comparison.

### 3.2.2 Synthesis of [PPN][P(CN·HCN)<sub>2</sub>] (4)

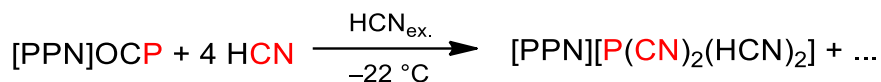

[PPN]OCP·acetone (0.08 g, 0.12 mmol, 1 eq.) was placed in a Schlenk tube which was cooled to 0 °C afterwards. 100 µL of HCN (60 mg, 2.14 mmol, 17 eq.) which was cooled to 0 °C was transferred onto the salt via a pre-cooled syringe. The mixture was shaken rapidly for two minutes but no complete dissolution of the salt was noticed. The liquid phase of the suspension started to change the color (brownish) as soon as HCN was added. Several attempts to obtain crystals by cooling the mixture slowly to -21 °C did not lead to crystallization. However, at -22 °C the upper liquid phase started to solidify slowly. This process was initiated as soon as the solid material of the suspension had settled to the bottom of the flask. **Small** amounts of the solid were transferred to a self-build low-temperature mounting station for crystal picking, which was cooled to -60 °C. Under the microscope evolving gas was observed (subliming HCN). The amount of the colorless solid started to reduce and after one minute colorless crystals were formed. X-ray analysis revealed the formation of [PPN][P(CN)<sub>2</sub>(HCN)<sub>2</sub>] (4).

C<sub>40</sub>H<sub>32</sub>N<sub>5</sub>P<sub>4</sub> (675.14 g/mol): **Raman** (laser: 633 nm, accumulation time: 4 s ,20 scans, 225 K, cm<sup>-1</sup>)  $\tilde{\nu}$  = 99 (8), 114 (9), 137 (5), 177 (1), 184(1), 195 (1), 205 (1), 226 (2), 236 (3), 252 (2), 267 (2), 285 (1), 344 (1), 361 (1), 386 (1), 392 (1), 402 (1), 413 (1), 447 (1), 459 (1), 491 (1), 526 (1), 536 (1), 547 (1), 614 (2), 633 (1), 664 (4), 693 (1), 725 (1), 745 (1), 803 (1), 842 (1), 848 (1), 852 (1), 866 (1), 927 (1), 939 (1), 1001 (9), 1027 (3), 1031 (3), 1071 (1), 1111 (3), 1162 (1), 1166 (1), 1179 (1), 1192 (1), 1282 (1), 1312 (1), 1337 (1), 1438 (1), 1483 (1), 1576 (1), 1588 (3), 2022 (1), 2025 (1), 2048 (1), 2064 (1), 2074 (1) (shoulder), 2084 (3), 2105 (10), 2958 (1), 2993 (1), 3011 (1), 3048 (1), 3057 (3), 3074 (1), 3089 (1), 3145 (1), 3151 (1), 3175 (1).

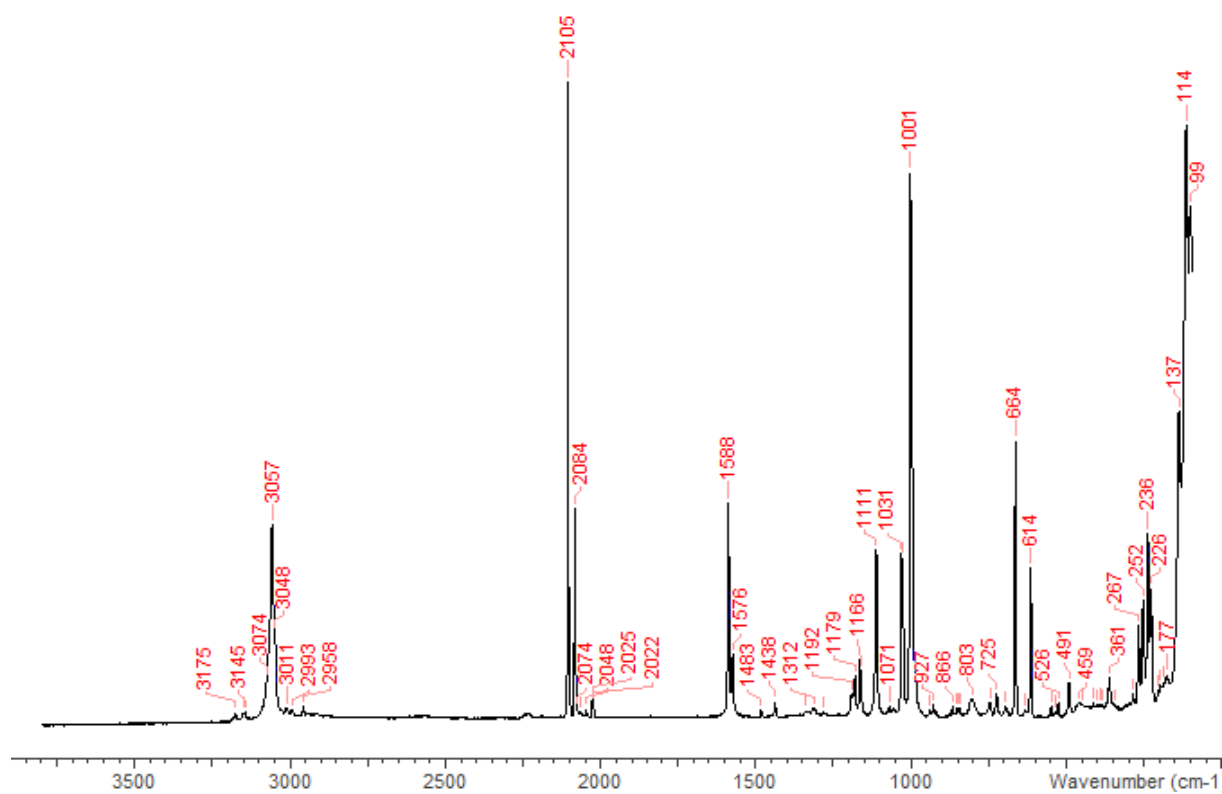

Figure S34. Raman spectrum of 4.

## 4 Computational Details

All computations were carried out using Gaussian09.<sup>[9]</sup>

**Method.** Just recently we reported on the synthesis of  $[\text{CN}(\text{HCN})_n]^-$  ( $n = 2, 3$ )<sup>[5]</sup> and used different methods (M06, MP2, CCSD(T) and PBE0) in combination with the Grimme's dispersion model D3BJ and two different basis sets (pVDZ, pVTZ) to optimize the molecular structure of the isomers. We found that the DFT method pbe0<sup>[10-12]</sup> with Grimme's dispersion model D3BJ<sup>[13-14]</sup> in conjunction with the aug-cc-pVTZ<sup>[15-19]</sup> basis set provides good qualitative and quantitative results. Therefore, we decided to use this combination here as well.

**Structure.** All structures were fully optimized and confirmed as minima by frequency analyses (NIMAG = 0). Cartesian coordinates of all considered species can be found at the end of the document.

All **green marked** compounds in forthcoming tables represent structures, where proton migration during optimization occurred, while the **red marked** isomers are the energetically most favored ones.

**Note.** We would like to point out that all solvates of the type  $[\text{X}(\text{HCN})_n]^-$  ( $\text{X} = \text{N}_3, \text{OCN}, \text{SCN}$ ) have very flat potentials for the bridging H–C and H–N distances as well as angles and dihedral angles. Therefore, the structure at ambient temperatures can be considered to be highly dynamic. Although the calculated gas phase energy data agree very well with the experimental data, it is difficult to compare the structural data with one another, even if the thermodynamically favored gas phase structural motifs are also observed in the solid state (best isomer). However, there are significant differences in terms of linearity and planarity due to very soft potentials for bending/distortion.

### Mono-, Di- and Trisolvates $[N_3(HCN)_n]^-$

Table S2. Absolute energies in a.u and relative energies in kcal/mol. Red: Energetically preferred isomer. Green: Proton migration during optimization.

| isomer     | symmetry  | connectivity |      |      |      | # bonds |    | # bridge |    | E0          | H298        | G298        | $\Delta E0$ | $\Delta H298$ | $\Delta G298$ |
|------------|-----------|--------------|------|------|------|---------|----|----------|----|-------------|-------------|-------------|-------------|---------------|---------------|
|            |           | NCH          | NNN  | NC   | HNNN | HC      | HN | HC       | HN |             |             |             |             |               |               |
| <b>M1</b>  | <b>C1</b> | NCH          | NNN  |      |      | 1       |    |          | 1  | -257.493829 | -257.45918  | -257.495461 | 0.00        | 0.00          | 0.00          |
| <b>M2</b>  | <b>C1</b> | CN           | HNNN |      |      |         | 1  |          | 1  | -257.485195 | -257.451665 | -257.488133 | 5.42        | 4.72          | 4.60          |
| <b>D1</b>  | <b>C1</b> | NCH          | NCH  | NNN  |      | 2       |    |          | 2  | -350.860038 | -350.805475 | -350.852547 | 4.44        | 3.56          | 3.82          |
| <b>D2</b>  | <b>C1</b> | NCH          | CNH  | NNN  |      | 1       | 1  | 1        | 1  | -350.859157 | -350.803245 | -350.85063  | 5.00        | 4.96          | 5.02          |
| <b>D3</b>  | <b>C1</b> | CNH          | NC   | HNNN |      |         | 2  | 1        | 1  | -350.850478 | -350.79533  | -350.841763 | 10.44       | 9.93          | 10.59         |
| <b>D4</b>  | <b>C1</b> | CNH          | CNH  | NNN  |      |         | 2  | 1        | 1  | -350.849176 | -350.794121 | -350.840943 | 11.26       | 10.69         | 11.10         |
| <b>D5</b>  | <b>C1</b> | NCH          | NNN  | HCN  |      | 2       |    |          | 2  | -350.866673 | -350.810356 | -350.859300 | 0.28        | 0.50          | -0.42         |
| <b>D6</b>  | <b>C1</b> | NCH          | NNN  | HNC  |      | 1       | 1  |          | 2  | -350.854605 | -350.798904 | -350.847106 | 7.85        | 7.68          | 7.23          |
| <b>D7</b>  | <b>C1</b> | CNH          | NNN  | HNC  |      |         | 2  |          | 2  | -350.841790 | -350.786376 | -350.833753 | 15.89       | 15.55         | 15.61         |
| <b>D8</b>  | <b>Cs</b> | NCH          | NNN  |      |      | 2       |    |          | 2  | -350.867119 | -350.811149 | -350.858632 | 0.00        | 0.00          | 0.00          |
| <b>D9</b>  | <b>Cs</b> | NCH          | NNN  |      |      | 1       | 1  |          | 2  | -350.855634 | -350.800456 | -350.847541 | 7.21        | 6.71          | 7.96          |
| <b>D10</b> | <b>Cs</b> | CNH          | NNN  |      |      |         | 2  |          | 2  | -350.843463 | -350.788726 | -350.835265 | 14.84       | 14.07         | 14.66         |
| <b>T1</b>  | <b>C1</b> | NCH          | NCH  | NC   | HNNN | 2       | 1  | 1        | 2  | -444.224689 | -444.147706 | -444.205789 | 6.26        | 5.70          | 7.10          |
| <b>T2</b>  | <b>C1</b> | NCH          | NCH  | CN   | HNNN | 2       | 1  | 1        | 2  | -444.222684 | -444.145452 | -444.203811 | 7.52        | 7.12          | 8.34          |
| <b>T3</b>  | <b>C1</b> | NCH          | CNH  | NC   | HNNN | 1       | 2  | 1        | 2  | -444.215787 | -444.140045 | -444.197343 | 11.83       | 10.51         | 12.40         |
| <b>T4</b>  | <b>C1</b> | NCH          | CN   | HCN  | HNNN | 2       | 1  | 1        | 2  | -444.221339 | -444.14385  | -444.202372 | 8.37        | 8.12          | 9.24          |
| <b>T5</b>  | <b>C1</b> | CNH          | NCH  | NC   | HNNN | 1       | 2  | 1        | 2  | -444.210023 | -444.133274 | -444.190466 | 15.47       | 14.76         | 16.71         |
| <b>T6</b>  | <b>C1</b> | CNH          | NCH  | CN   | HNNN | 1       | 2  | 1        | 2  | -444.208130 | -444.13128  | -444.188626 | 16.65       | 16.01         | 17.87         |

| isomer | symmetry | connectivity |     |      |      | # bonds |    | # bridge |    | E0          | H298        | G298        | $\Delta E0$ | $\Delta H298$ | $\Delta G298$ |
|--------|----------|--------------|-----|------|------|---------|----|----------|----|-------------|-------------|-------------|-------------|---------------|---------------|
|        |          |              |     |      |      | HC      | HN | HC       | HN |             |             |             |             |               |               |
| T7     | C1       | CNH          | CN  | HCN  | HNNN | 1       | 2  | 1        | 2  | -444.211039 | -444.134254 | -444.192194 | 14.83       | 14.14         | 15.63         |
| T8     | C1       | CNH          | CN  | HNC  | HNNN |         | 3  | 1        | 2  | -444.203278 | -444.128009 | -444.184739 | 19.70       | 18.06         | 20.31         |
| T9     | C1       | NCH          | NCH | NNN  | HCN  | 3       |    |          | 3  | -444.229944 | -444.152464 | -444.212405 | 2.97        | 2.72          | 2.95          |
| T10    | C1       | NCH          | NCH | NNN  | HNC  | 2       | 1  |          | 3  | -444.217138 | -444.139988 | -444.199156 | 11.00       | 10.54         | 11.26         |
| T11    | C1       | NCH          | CNH | NNN  | HCN  | 2       | 1  | 1        | 2  | -444.219798 | -444.144272 | -444.203538 | 9.33        | 7.86          | 8.51          |
| T12    | C1       | NCH          | CNH | NNN  | HNC  | 1       | 2  | 1        | 2  | -444.205987 | -444.129805 | -444.188056 | 18.00       | 16.93         | 18.23         |
| T13    | C1       | CNH          | NCH | NNN  | HCN  | 2       | 1  |          | 3  | -444.215294 | -444.138201 | -444.197175 | 12.16       | 11.67         | 12.50         |
| T14    | C1       | CNH          | NCH | NNN  | HNC  | 1       | 2  |          | 3  | -444.202221 | -444.125323 | -444.183473 | 20.13       | 19.75         | 21.10         |
| T15    | C1       | CNH          | CN  | HNNN | HCN  | 1       | 2  | 1        | 2  | -444.208907 | -444.132728 | -444.192663 | 16.17       | 15.10         | 15.34         |
| T16    | C1       | CNH          | CNH | NNN  | HNC  |         | 3  | 1        | 2  | -444.192364 | -444.117385 | -444.174913 | 26.55       | 24.73         | 26.47         |
| T17    | C1       | NCH          |     | NNN  | HCN  | 3       |    |          | 3  | -444.234671 | -444.156791 | -444.217103 | 0.00        | 0.00          | 0.00          |
|        |          | NCH          |     |      |      |         |    |          |    |             |             |             |             |               |               |
| T18    | C1       | NCH          |     | NNN  | HNC  | 2       | 1  |          | 3  | -444.220891 | -444.143293 | -444.202734 | 8.65        | 8.47          | 9.02          |
|        |          | NCH          |     |      |      |         |    |          |    |             |             |             |             |               |               |
| T19    | C1       | CNH          |     | NNN  | HCN  | 2       | 1  |          | 3  | -444.221546 | -444.144073 | -444.204096 | 8.24        | 7.98          | 8.16          |
|        |          | NCH          |     |      |      |         |    |          |    |             |             |             |             |               |               |
| T20    | C1       | CNH          |     | NNN  | HNC  | 1       | 2  |          | 3  | -444.207218 | -444.129889 | -444.18883  | 17.23       | 16.88         | 17.74         |
|        |          | NCH          |     |      |      |         |    |          |    |             |             |             |             |               |               |
| T21    | C1       | CNH          |     | NNN  | HCN  | 1       | 2  |          | 3  | -444.193128 | -444.11602  | -444.174384 | 26.76       | 25.58         | 26.81         |
|        |          | CNH          |     |      |      |         |    |          |    |             |             |             |             |               |               |

| isomer | symmetry | connectivity          | # bonds |    | # bridge |    | E0          | H298        | G298        | $\Delta E0$ | $\Delta H298$ | $\Delta G298$ |
|--------|----------|-----------------------|---------|----|----------|----|-------------|-------------|-------------|-------------|---------------|---------------|
|        |          |                       | HC      | HN | HC       | HN |             |             |             |             |               |               |
| T22    | C1       | CNH<br>NNN HCN<br>CNH |         | 3  |          | 3  | -444.207966 | -444.130797 | -444.190495 | 16.76       | 16.31         | 16.70         |

**Table S3.** Reaction energies (pbe0/aug-cc-pVTZ) for the stepwise formation of solvates in kcal/mol (for the thermodynamically most favored isomer).

| m1 C1  | HCN + N <sub>3</sub> <sup>-</sup> → monomer <sup>-</sup> |  |  |
|--------|----------------------------------------------------------|--|--|
| E0     |                                                          |  |  |
| H298   |                                                          |  |  |
| G298   |                                                          |  |  |
| D8 Cs  |                                                          |  |  |
| E0     |                                                          |  |  |
| H298   |                                                          |  |  |
| G298   |                                                          |  |  |
| T17 C1 |                                                          |  |  |
| E0     |                                                          |  |  |
| H298   |                                                          |  |  |
| G298   |                                                          |  |  |

### Mono-, Di- and Trisolates [OCN(HCN)<sub>n</sub>]<sup>-</sup>

Table S4. Absolute energies in a.u and relative energies in kcal/mol. Red: Energetically preferred isomer. Green: Proton migration during optimization.

| isomer | symmetry | connectivity |     |     | # bonds |    | # bridge |    |             | E0          | H298        | G298  | ΔE0   | ΔH298 | ΔG298 |
|--------|----------|--------------|-----|-----|---------|----|----------|----|-------------|-------------|-------------|-------|-------|-------|-------|
|        |          |              |     |     | HC      | HN | HC       | HN | HS          |             |             |       |       |       |       |
| M1     | Cs       | NCH          | OCN |     | 1       |    |          | 1  | -261.384680 | -261.349739 | -261.386015 | 4.16  | 3.99  | 4.24  |       |
| M2     | Cv       | NCH          | NCO |     | 1       |    | 1        |    | -261.391309 | -261.356092 | -261.392769 | 0.00  | 0.00  | 0.00  |       |
| M3     | Cs       | CNH          | OCN |     | 1       |    |          | 1  | -261.373626 | -261.339397 | -261.375259 | 11.60 | 10.48 | 10.99 |       |
| M4     | Cv       | CNH          | NCO |     | 1       |    | 1        |    | -261.383395 | -261.350118 | -261.38824  | 4.97  | 3.75  | 2.84  |       |
| d1     | C2v      | NCH          | OCN |     | 2       |    |          | 2  | -354.754653 | -354.698179 | -354.745181 | 6.39  | 6.65  | 6.49  |       |
| d2     | C2v      | NCH          | NCO |     | 2       |    | 2        |    | -354.764838 | -354.708776 | -354.755517 | 0.00  | 0.00  | 0.00  |       |
| d3     | Cs       | NCH          | OCN |     | 1       | 1  |          | 2  | -354.741617 | -354.68545  | -354.732731 | 14.57 | 14.64 | 14.30 |       |
| d4     | Cs       | NCH          | NCO |     | 1       | 1  |          | 2  | -354.753755 | -354.698383 | -354.745483 | 6.95  | 6.52  | 6.30  |       |
| d5     | C2v      | CNH          | OCN |     | 2       |    |          | 2  | -354.727798 | -354.671777 | -354.717862 | 23.24 | 23.22 | 23.63 |       |
| d6     | C2v      | CNH          | NCO |     | 1       | 1  |          | 2  | -354.741472 | -354.686396 | -354.732371 | 14.66 | 14.04 | 14.52 |       |
| d7     | Cs       | NCH          | NCH | OCN |         | 2  |          | 1  | -354.748698 | -354.692734 | -354.740558 | 10.13 | 10.07 | 9.39  |       |
| d8     | Cv       | NCH          | NCH | NCO |         | 2  |          | 2  | -354.757843 | -354.70212  | -354.752183 | 4.39  | 4.18  | 2.09  |       |
| d9     | Cs       | NCH          | CNH | OCN |         | 1  | 1        | 1  | -354.739094 | -354.684594 | -354.731652 | 16.15 | 15.17 | 14.98 |       |



| isomer | symmetry | connectivity |     |      |      | # bonds |    | # bridge |    |             | E0          | H298        | G298        | $\Delta E0$ | $\Delta H298$ | $\Delta G298$ |
|--------|----------|--------------|-----|------|------|---------|----|----------|----|-------------|-------------|-------------|-------------|-------------|---------------|---------------|
|        |          |              |     |      |      | HC      | HN | HC       | HN | HS          |             |             |             |             |               |               |
| d10    | Cs       | NCH          | CN  | HNCO | 1    |         | 1  | 1        |    | -354.756777 | -354.701353 | -354.74896  | 5.06        | 4.66        | 4.11          |               |
| d11    | Cs       | CNH          | NCH | OCN  | 1    | 1       |    | 1        | 1  | -354.734076 | -354.678507 | -354.725253 | 19.30       | 18.99       | 18.99         |               |
| d12    | C1       | CNH          | NCH | NCO  | 1    | 1       |    | 2        |    | -354.747844 | -354.693047 | -354.739399 | 10.66       | 9.87        | 10.11         |               |
| d13    | Cs       | CNH          | CNH | OCN  | 2    |         |    | 1        | 1  | -354.725813 | -354.672837 | -354.719068 | 24.49       | 22.55       | 22.87         |               |
| d14    | Cs       | CNH          | CN  | HNCO | 2    |         | 1  | 1        |    | -354.747109 | -354.692434 | -354.738961 | 11.13       | 10.25       | 10.39         |               |
| d15    | Cs       | NCH          | OCN | HCN  |      | 2       |    | 1        | 1  | -354.761901 | -354.705608 | -354.754188 | 1.84        | 1.99        | 0.83          |               |
| d16    | Cs       | NCH          | OCN | HNC  | 1    | 1       |    | 1        | 1  | -354.752373 | -354.696777 | -354.744412 | 7.82        | 7.53        | 6.97          |               |
| d17    | Cs       | NCH          | NCO | HNC  | 1    | 1       |    | 1        | 1  | -354.748689 | -354.692701 | -354.740925 | 10.13       | 10.09       | 9.16          |               |
| d18    | Cs       | CNH          | NCO | HNC  |      | 2       |    | 1        | 1  | -354.737735 | -354.68231  | -354.730109 | 17.01       | 16.61       | 15.94         |               |
| t1     | Cs       | NCH          | NCH | NCH  | OCN  |         | 3  |          | 2  | 1           | -448.109341 | -448.032111 | -448.090315 | 13.75       | 13.35         | 14.44         |
| t2     | C1       | NCH          | NCH | NC   | HNCO |         | 3  |          | 3  |             | -448.122008 | -448.045377 | -448.103335 | 5.80        | 5.03          | 6.27          |
| t3     | Cs       | NCH          | NCH | CNH  | OCN  | 1       | 2  | 1        | 1  | 1           | -448.100884 | -448.02592  | -448.083475 | 19.06       | 17.23         | 18.73         |
| t4     | C1       | NCH          | NCH | CN   | HNCO | 1       | 2  | 1        | 2  |             | -448.120586 | -448.043753 | -448.101839 | 6.69        | 6.04          | 7.21          |
| t5     | Cs       | NCH          | CNH | CN   | HOCN | 2       | 1  | 2        |    | 1           | -448.090307 | -448.015739 | -448.072439 | 25.69       | 23.62         | 25.66         |
| t6     | Cs       | NCH          | CN  | HCN  | HNCO | 2       | 1  | 2        | 1  |             | -448.118789 | -448.041677 | -448.099817 | 7.82        | 7.35          | 8.48          |
| t7     | Cs       | NCH          | CNH | NCH  | OCN  | 1       | 2  | 1        | 1  | 1           | -448.096244 | -448.019778 | -448.076836 | 21.97       | 21.09         | 22.90         |
| t8     | Cs       | NCH          | CN  | HNC  | HNCO | 1       | 2  | 1        | 2  |             | -448.113117 | -448.037708 | -448.094882 | 11.38       | 9.84          | 11.57         |
| t9     | Cs       | CNH          | NCH | NCH  | OCN  | 1       | 2  |          | 2  | 1           | -448.093592 | -448.01659  | -448.073755 | 23.63       | 23.09         | 24.83         |
| t10    | Cs       | CNH          | NCH | NCH  | NCO  | 1       | 2  |          | 3  |             | -448.107340 | -448.03094  | -448.08797  | 15.00       | 14.08         | 15.91         |
| t11    | Cs       | CNH          | CNH | NCH  | OCN  | 2       | 1  | 1        | 1  | 1           | -448.081424 | -448.005459 | -448.061575 | 31.27       | 30.07         | 32.47         |
| t12    | C1       | CNH          | CNH | NC   | HNCO | 2       | 1  | 1        | 2  |             | -448.100534 | -448.025653 | -448.08218  | 19.28       | 17.40         | 19.54         |
| t13    | Cs       | CNH          | NCH | CNH  | OCN  | 2       | 1  | 1        | 1  | 1           | -448.085522 | -448.010922 | -448.067422 | 28.70       | 26.65         | 28.80         |
| t14    | C1       | CNH          | NCH | CN   | HNCO | 2       | 1  | 1        | 2  |             | -448.105999 | -448.029517 | -448.086554 | 15.85       | 14.98         | 16.80         |
| t15    | Cs       | CNH          | CNH | CNH  | OCN  | 3       |    | 2        |    | 1           | -448.076505 | -448.002858 | -448.058931 | 34.35       | 31.71         | 34.13         |
| t16    | Cs       | CNH          | CN  | HCN  | HNCO | 3       |    | 2        | 1  |             | -448.108441 | -448.032007 | -448.089529 | 14.31       | 13.41         | 14.93         |
| t25    | C1       | NCH          | NCH | OCN  | HCN  |         | 3  |          | 2  | 1           | -448.124783 | -448.047054 | -448.106144 | 4.06        | 3.97          | 4.51          |
| t26    | C1       | NCH          | NCH | NCO  | HCN  |         | 3  |          | 2  | 1           | -448.126697 | -448.0492   | -448.108297 | 2.86        | 2.63          | 3.16          |

| isomer | symmetry | connectivity |     |      |     | # bonds |    | # bridge |    |    | E0          | H298        | G298        | $\Delta E0$ | $\Delta H298$ | $\Delta G298$ |
|--------|----------|--------------|-----|------|-----|---------|----|----------|----|----|-------------|-------------|-------------|-------------|---------------|---------------|
|        |          |              |     |      |     | HC      | HN | HC       | HN | HS |             |             |             |             |               |               |
| t27    | C1       | NCH          | NCH | OCN  | HNC | 1       | 2  |          | 2  | 1  | -448.113393 | -448.036225 | -448.095408 | 11.21       | 10.77         | 11.24         |
| t28    | C1       | NCH          | NCH | NCO  | HNC | 1       | 2  |          | 2  | 1  | -448.113202 | -448.035849 | -448.094315 | 11.33       | 11.00         | 11.93         |
| t29    | C1       | NCH          | CNH | OCN  | HCN | 1       | 2  | 1        | 1  | 1  | -448.113209 | -448.036104 | -448.094409 | 11.32       | 10.84         | 11.87         |
| t30    | C1       | NCH          | CN  | HNCO | HCN | 1       | 2  | 1        | 1  | 1  | -448.118795 | -448.043472 | -448.103907 | 7.82        | 6.22          | 5.91          |
| t31    | C1       | NCH          | CNH | OCN  | HNC | 2       | 1  | 1        | 1  | 1  | -448.101908 | -448.025076 | -448.082876 | 18.41       | 17.76         | 19.11         |
| t32    | C1       | NCH          | CNH | NCO  | HNC | 2       | 1  | 1        | 1  | 1  | -448.104368 | -448.028457 | -448.086482 | 16.87       | 15.64         | 16.84         |
| t33    | C1       | CNH          | NCH | OCN  | HCN | 1       | 2  |          | 2  | 1  | -448.109048 | -448.031545 | -448.08958  | 13.93       | 13.70         | 14.90         |
| t34    | C1       | CNH          | NCH | NCO  | HCN | 1       | 2  |          | 2  | 1  | -448.112370 | -448.035294 | -448.09365  | 11.85       | 11.35         | 12.35         |
| t35    | C1       | CNH          | NCH | OCN  | HNC | 2       | 1  |          | 2  | 1  | -448.098902 | -448.021868 | -448.079551 | 20.30       | 19.78         | 21.19         |
| t36    | C1       | CNH          | NCH | NCO  | HNC | 2       | 1  |          | 2  | 1  | -448.098666 | -448.021643 | -448.079263 | 20.45       | 19.92         | 21.37         |
| t37    | C1       | CNH          | CNH | OCN  | HCN | 2       | 1  | 1        | 1  | 1  | -448.099211 | -448.022666 | -448.080116 | 20.11       | 19.28         | 20.84         |
| t38    | C1       | CNH          | CN  | HNCO | HCN | 2       | 1  | 1        | 1  | 1  | -448.107637 | -448.031983 | -448.091576 | 14.82       | 13.43         | 13.65         |
| t39    | C1       | CNH          | CNH | OCN  | HNC | 3       |    | 1        | 1  | 1  | -448.087657 | -448.011248 | -448.068149 | 27.36       | 26.44         | 28.35         |
| t40    | C1       | CNH          | CNH | NCO  | HNC | 3       |    | 1        | 1  | 1  | -448.091612 | -448.016762 | -448.075266 | 24.87       | 22.98         | 23.88         |
| t17    | C1       | NCH          | NCO | HCN  |     |         | 3  |          | 2  | 1  | -448.131251 | -448.053385 | -448.113325 | 0.00        | 0.00          | 0.00          |
| t18    | C2v      | NCH          | OCN | HCN  |     |         | 3  |          | 1  | 2  | -448.127938 | -448.049888 | -448.108795 | 2.08        | 2.19          | 2.84          |
| t19    | C1       | CNH          | NCO | HCN  |     | 1       | 2  |          | 2  | 1  | -448.118800 | -448.041339 | -448.101039 | 7.81        | 7.56          | 7.71          |
| t20    | Cs       | CNH          | OCN | HCN  |     | 1       | 2  |          | 1  | 2  | -448.113659 | -448.035773 | -448.094858 | 11.04       | 11.05         | 11.59         |

| isomer | symmetry | connectivity | # bonds |    | # bridge |    |             | E0          | H298        | G298  | $\Delta E0$ | $\Delta H298$ | $\Delta G298$ |
|--------|----------|--------------|---------|----|----------|----|-------------|-------------|-------------|-------|-------------|---------------|---------------|
|        |          |              | HC      | HN | HC       | HN | HS          |             |             |       |             |               |               |
| t21    | C2v      | CNH          | 2       | 1  | 1        | 2  | -448.098763 | -448.020975 | -448.078814 | 20.39 | 20.34       | 21.66         |               |
|        |          | OCN HCN      |         |    |          |    |             |             |             |       |             |               |               |
| t22    | C1       | CNH          | 2       | 1  | 2        | 1  | -448.105335 | -448.028129 | -448.087372 | 16.26 | 15.85       | 16.29         |               |
|        |          | NCO HCN      |         |    |          |    |             |             |             |       |             |               |               |
| t23    | C2v      | CNH          | 3       |    | 1        | 2  | -448.086520 | -448.009013 | -448.066314 | 28.07 | 27.84       | 29.50         |               |
|        |          | OCN HNC      |         |    |          |    |             |             |             |       |             |               |               |
| t24    | C1       | CNH          | 3       |    | 2        | 1  | -448.090119 | -448.012922 | -448.071332 | 25.81 | 25.39       | 26.35         |               |
|        |          | NCO HNC      |         |    |          |    |             |             |             |       |             |               |               |
| t41    | C1       | CNH          | 1       | 2  | 1        | 2  | -448.101795 | -448.024251 | -448.082825 | 18.48 | 18.28       | 19.14         |               |
|        |          | OCN HNC      |         |    |          |    |             |             |             |       |             |               |               |
| t42    | C1       | CNH          | 1       | 2  | 2        | 1  | -448.104011 | -448.026607 | -448.085554 | 17.09 | 16.80       | 17.43         |               |
|        |          | NCO HNC      |         |    |          |    |             |             |             |       |             |               |               |
|        |          | NCH          |         |    |          |    |             |             |             |       |             |               |               |

**Table S5.** Reaction energies (pbe0/aug-cc-pVTZ) for the stepwise formation of solvates in kcal/mol (for the thermodynamically most favored isomer with two C–H···N H-bridges).

| <b>M2 Cv</b>  | <b>HCN + NCO<sup>-</sup> → monomer<sup>-</sup></b>   |                                                        |                                                     |
|---------------|------------------------------------------------------|--------------------------------------------------------|-----------------------------------------------------|
| <b>E0</b>     | -25.0                                                |                                                        |                                                     |
| <b>H298</b>   | -24.6                                                |                                                        |                                                     |
| <b>G298</b>   | -17.6                                                |                                                        |                                                     |
| <b>D2 C2v</b> | <b>2 HCN + NCO<sup>-</sup> → monomer<sup>-</sup></b> | <b>HCN + monomer<sup>-</sup> → dimer<sup>-</sup></b>   |                                                     |
| <b>E0</b>     | -43.4                                                | -18.4                                                  |                                                     |
| <b>H298</b>   | -42.4                                                | -17.8                                                  |                                                     |
| <b>G298</b>   | -27.4                                                | -9.8                                                   |                                                     |
| <b>T17 C1</b> | <b>3 HCN + NCO<sup>-</sup> → monomer<sup>-</sup></b> | <b>2 HCN + monomer<sup>-</sup> → dimer<sup>-</sup></b> | <b>HCN + dimer<sup>-</sup> → trimer<sup>-</sup></b> |
| <b>E0</b>     | -57.4                                                | -32.3                                                  | -13.9                                               |
| <b>H298</b>   | -55.1                                                | -30.5                                                  | -12.7                                               |
| <b>G298</b>   | -34.1                                                | -16.5                                                  | -6.7                                                |

**Table S6.** Reaction energies (pbe0/aug-cc-pVTZ) for the stepwise formation of solvates in kcal/mol (for the thermodynamically favored isomer with two C–H···O H-bridges).

| <b>M2 Cs</b>   | <b>HCN + OCN<sup>-</sup> → monomer<sup>-</sup></b>   |                                                        |                                                     |
|----------------|------------------------------------------------------|--------------------------------------------------------|-----------------------------------------------------|
| <b>E0</b>      | -25.0                                                |                                                        |                                                     |
| <b>H298</b>    | -24.6                                                |                                                        |                                                     |
| <b>G298</b>    | -17.6                                                |                                                        |                                                     |
| <b>D15 Cs</b>  | <b>2 HCN + OCN<sup>-</sup> → monomer<sup>-</sup></b> | <b>HCN + monomer<sup>-</sup> → dimer<sup>-</sup></b>   |                                                     |
| <b>E0</b>      | -41.6                                                | -16.5                                                  |                                                     |
| <b>H298</b>    | -40.4                                                | -15.8                                                  |                                                     |
| <b>G298</b>    | -26.6                                                | -9.0                                                   |                                                     |
| <b>T18 C2v</b> | <b>3 HCN + OCN<sup>-</sup> → monomer<sup>-</sup></b> | <b>2 HCN + monomer<sup>-</sup> → dimer<sup>-</sup></b> | <b>HCN + dimer<sup>-</sup> → trimer<sup>-</sup></b> |
| <b>E0</b>      | -55.3                                                | -30.2                                                  | -13.7                                               |
| <b>H298</b>    | -52.9                                                | -28.4                                                  | -12.5                                               |
| <b>G298</b>    | -31.3                                                | -13.6                                                  | -4.7                                                |

### Mono- and Disolvates of $[\text{SCN}(\text{HCN})_n]^-$

Table S7. Absolute energies in a.u and relative energies in kcal/mol. Red: Energetically preferred isomer. Green: Proton migration during optimization.

| isomer | symmetry | connectivity |     |      | # bonds |    | # bridge |    |             | E0          | H298        | G298  | $\Delta E0$ | $\Delta H298$ | $\Delta G298$ |
|--------|----------|--------------|-----|------|---------|----|----------|----|-------------|-------------|-------------|-------|-------------|---------------|---------------|
|        |          |              |     |      | HC      | HN | HC       | HN | HS          |             |             |       |             |               |               |
| m1     | Cs       | NCH          | SCN |      | 1       |    |          | 1  | -584.286433 | -584.253222 | -584.292258 | 3.68  | 3.29        | 2.29          |               |
| m2     | Cs       | CNH          | SCN |      |         | 1  |          | 1  | -584.271575 | -584.238852 | -584.277471 | 13.00 | 12.31       | 11.57         |               |
| m3     | Cv       | NCH          | NCS |      | 1       |    | 1        |    | -584.292293 | -584.258464 | -584.295911 | 0.00  | 0.00        | 0.00          |               |
| m4     | Cv       | CNH          | NCS |      |         | 1  |          | 1  | -584.281709 | -584.248616 | -584.285268 | 6.64  | 6.18        | 6.68          |               |
| d1     | C1       | NCH          | SCN | HCN  | 2       |    | 1        | 1  | -677.658853 | -677.604223 | -677.654479 | 0.58  | 0.57        | 0.29          |               |
| d2     | C1       | NCH          | SCN | HNC  | 1       | 1  | 1        | 1  | -677.646998 | -677.5928   | -677.642335 | 8.02  | 7.73        | 7.91          |               |
| d3     | C1       | CNH          | SCN | HNC  |         | 2  | 1        | 1  | -677.631116 | -677.577225 | -677.626312 | 17.99 | 17.51       | 17.97         |               |
| d10    | C1       | CNH          | SCN | HCN  | 1       | 1  | 1        | 1  | -677.643237 | -677.588981 | -677.638802 | 10.38 | 10.13       | 10.13         |               |
| d11    | C1       | NCH          | NCH | SCN  | 2       |    | 1        | 1  | -677.649632 | -677.595117 | -677.645231 | 6.37  | 6.28        | 6.10          |               |
| d12    | C1       | NCH          | NCH | NCS  | 2       |    | 2        |    | -677.656370 | -677.601887 | -677.644249 | 2.14  | 2.03        | 6.71          |               |
| d13    | C1       | NCH          | CNH | SCN  | 1       | 1  | 1        | 1  | -677.635516 | -677.581728 | -677.631282 | 15.22 | 14.68       | 14.85         |               |
| d14    | C1       | NCH          | CNH | NCS  | 1       | 1  | 1        | 1  | -677.647694 | -677.595094 | -677.639854 | 7.58  | 6.29        | 9.47          |               |
| d15    | C1       | CNH          | CNH | SCN  |         | 2  | 1        | 1  | -677.621409 | -677.568117 | -677.616851 | 24.08 | 23.22       | 23.91         |               |
| d16    | C1       | CNH          | CN  | HNCS |         | 2  | 1        | 1  | -677.635536 | -677.5838   | -677.630625 | 15.21 | 13.38       | 15.26         |               |
| d17    | C1       | CNH          | NCH | SCN  | 1       | 1  | 1        | 1  | -677.634703 | -677.580443 | -677.629629 | 15.73 | 15.49       | 15.89         |               |
| d18    | C1       | CNH          | NCH | NCS  | 1       | 1  | 2        |    | -677.641922 | -677.58784  | -677.632607 | 11.20 | 10.85       | 14.02         |               |
| d4     | C1       | NCH          | SCN |      | 2       |    |          | 2  | -677.652662 | -677.598171 | -677.649815 | 4.47  | 4.36        | 3.22          |               |
| d5     | C1       | CNH          | SCN |      | 1       | 1  |          | 2  | -677.636869 | -677.582743 | -677.633747 | 14.38 | 14.05       | 13.31         |               |
| d6     | C1       | CNH          | SCN |      |         | 2  |          | 2  | -677.620820 | -677.567012 | -677.617322 | 24.45 | 23.92       | 23.61         |               |

| isomer    | symmetry   | connectivity |     |     |     | # bonds |    |    | # bridge |  |  | E0          | H298        | G298        | $\Delta E0$ | $\Delta H298$ | $\Delta G298$ |
|-----------|------------|--------------|-----|-----|-----|---------|----|----|----------|--|--|-------------|-------------|-------------|-------------|---------------|---------------|
|           |            | HC           | HN  | HC  | HN  | HS      | HC | HN | HS       |  |  |             |             |             |             |               |               |
| <b>d7</b> | <b>Cs</b>  |              | HCN |     |     | 2       |    | 2  |          |  |  | -677.659778 | -677.605126 | -677.654954 | 0.00        | 0.00          | 0.00          |
|           |            | SCN          |     |     |     |         |    |    |          |  |  |             |             |             |             |               |               |
|           |            |              | HCN |     |     |         |    |    |          |  |  |             |             |             |             |               |               |
| <b>d7</b> | <b>C2v</b> |              | HCN |     |     | 2       |    | 2  |          |  |  | -677.659777 | -677.605117 | -677.654338 | 0.00        | 0.01          | 0.38          |
|           |            | SCN          |     |     |     |         |    |    |          |  |  |             |             |             |             |               |               |
|           |            |              | HCN |     |     |         |    |    |          |  |  |             |             |             |             |               |               |
| <b>d8</b> | <b>Cs</b>  |              | HNC |     |     | 1       | 1  | 2  |          |  |  | -677.646767 | -677.59248  | -677.641764 | 8.16        | 7.94          | 8.28          |
|           |            | SCN          |     |     |     |         |    |    |          |  |  |             |             |             |             |               |               |
|           |            |              | HCN |     |     |         |    |    |          |  |  |             |             |             |             |               |               |
| <b>d9</b> | <b>Cs</b>  |              | HNC |     |     |         | 2  | 2  |          |  |  | -677.632291 | -677.578329 | -677.627037 | 17.25       | 16.82         | 17.52         |
|           |            | SCN          |     |     |     |         |    |    |          |  |  |             |             |             |             |               |               |
|           |            |              | HNC |     |     |         |    |    |          |  |  |             |             |             |             |               |               |
| <b>d9</b> | <b>C2v</b> |              | HNC |     |     |         | 2  | 2  |          |  |  | -677.632291 | -677.578321 | -677.626382 | 17.25       | 16.82         | 17.93         |
|           |            | SCN          |     |     |     |         |    |    |          |  |  |             |             |             |             |               |               |
|           |            |              | HNC |     |     |         |    |    |          |  |  |             |             |             |             |               |               |
| <b>t1</b> | <b>C1</b>  | NCH          |     |     |     | 3       |    | 2  | 1        |  |  | -771.023166 | -770.947105 | -771.009913 | 0.00        | 0.00          | 0.00          |
|           |            |              | NCS | HCN |     |         |    |    |          |  |  |             |             |             |             |               |               |
|           |            | NCH          |     |     |     |         |    |    |          |  |  |             |             |             |             |               |               |
| <b>t2</b> | <b>C1</b>  | NCH          |     |     |     | 3       |    | 1  | 2        |  |  | -771.021906 | -770.94585  | -771.008972 | 0.79        | 0.79          | 0.59          |
|           |            |              | SCN | HCN |     |         |    |    |          |  |  |             |             |             |             |               |               |
|           |            | NCH          |     |     |     |         |    |    |          |  |  |             |             |             |             |               |               |
| <b>t3</b> | <b>C1</b>  | NCH          |     |     |     | 3       |    |    | 3        |  |  | -771.015432 | -770.939527 | -771.003656 | 4.85        | 4.76          | 3.93          |
|           |            | NCH          | SCN |     |     |         |    |    |          |  |  |             |             |             |             |               |               |
|           |            | NCH          |     |     |     |         |    |    |          |  |  |             |             |             |             |               |               |
| <b>t4</b> | <b>C1</b>  | NCH          | NCH | SCN | HCN | 3       |    | 2  | 1        |  |  | -771.020479 | -770.944432 | -771.015432 | 1.69        | 1.68          | 2.45          |
| <b>t5</b> | <b>C1</b>  | NCH          | NCH | NCS | HCN | 3       |    | 2  | 1        |  |  | -771.021581 | -770.945606 | -771.006863 | 0.99        | 0.94          | 1.91          |

| isomer | symmetry | connectivity |     |     |     | # bonds |    | # bridge |    |    | E0          | H298        | G298        | $\Delta E0$ | $\Delta H298$ | $\Delta G298$ |
|--------|----------|--------------|-----|-----|-----|---------|----|----------|----|----|-------------|-------------|-------------|-------------|---------------|---------------|
|        |          | NCH          | NCH | SCN | NCH | HC      | HN | HC       | HN | HS |             |             |             |             |               |               |
| t6     | C1       | NCH          | NCH | SCN | NCH | 3       |    | 1        | 2  |    | -771.014325 | -770.938393 | -771.00122  | 5.55        | 5.47          | 5.45          |
| t7     | Cs       | NCH          | NCH | NCS | NCH | 3       |    | 3        |    |    | -771.021994 | -770.946012 | -771.006985 | 0.74        | 0.69          | 1.84          |
| t8     | C1       | NCH          | NCH | NCH | NCS |         |    | 3        |    |    | -771.016203 | -770.940404 | -770.99642  | 4.37        | 4.20          | 8.47          |
| t9     | C1       | NCH          | NCH | NCH | SCN |         |    | 2        | 1  |    | -771.009305 | -770.933333 | -770.99454  | 8.70        | 8.64          | 9.65          |

**Table S8.** Reaction energies (pbe0/aug-cc-pVTZ) for the stepwise formation of solvates in kcal/mol (for the thermodynamically most favored isomers).

|              |                                                     |                                                         |                                                     |       |
|--------------|-----------------------------------------------------|---------------------------------------------------------|-----------------------------------------------------|-------|
| <b>M3 C1</b> | <b>HCN + NCS<sup>-</sup> → monomer<sup>-</sup></b>  |                                                         |                                                     |       |
| <i>E0</i>    |                                                     | -20.2                                                   |                                                     |       |
| <i>H298</i>  |                                                     | -19.4                                                   |                                                     |       |
| <i>G298</i>  |                                                     | -12.0                                                   |                                                     |       |
| <b>D7 Cs</b> | <b>2 HCN + NCS<sup>-</sup> → dimer<sup>-</sup></b>  | <b>HCN + monomer<sup>-</sup> → dimer<sup>-</sup></b>    |                                                     |       |
| <i>E0</i>    |                                                     | -34.8                                                   | -14.6                                               |       |
| <i>H298</i>  |                                                     | -33.4                                                   | -14.0                                               |       |
| <i>G298</i>  |                                                     | -19.5                                                   | -7.5                                                |       |
| <b>T1 C1</b> | <b>3 HCN + NCS<sup>-</sup> → trimer<sup>-</sup></b> | <b>2 HCN + monomer<sup>-</sup> → trimer<sup>-</sup></b> | <b>HCN + dimer<sup>-</sup> → trimer<sup>-</sup></b> |       |
| <i>E0</i>    |                                                     | -46.8                                                   | -26.6                                               | -12.0 |
| <i>H298</i>  |                                                     | -45.5                                                   | -25.1                                               | -11.1 |
| <i>G298</i>  |                                                     | -24.4                                                   | -12.4                                               | -4.9  |

**Table S9.** Reaction energies (pbe0/aug-cc-pVTZ) for the stepwise formation of solvates in kcal/mol (for the experimentally observed isomers + solvation of a third HCN solvate).

| M3 C1       | HCN + NCS <sup>-</sup> → monomer <sup>-</sup>  |       |                                                    |       |                                                |
|-------------|------------------------------------------------|-------|----------------------------------------------------|-------|------------------------------------------------|
| <i>E0</i>   |                                                | -20.2 |                                                    |       |                                                |
| <i>H298</i> |                                                | -19.4 |                                                    |       |                                                |
| <i>G298</i> |                                                | -12.0 |                                                    |       |                                                |
| D1 C1       | 2 HCN + NCS <sup>-</sup> → dimer <sup>-</sup>  |       | HCN + monomer <sup>-</sup> → dimer <sup>-</sup>    |       |                                                |
| <i>E0</i>   |                                                | -34.2 |                                                    | -14.0 |                                                |
| <i>H298</i> |                                                | -32.9 |                                                    | -13.5 |                                                |
| <i>G298</i> |                                                | -19.2 |                                                    | -7.2  |                                                |
| T1 C1       | 3 HCN + NCS <sup>-</sup> → trimer <sup>-</sup> |       | 2 HCN + monomer <sup>-</sup> → trimer <sup>-</sup> |       | HCN + dimer <sup>-</sup> → trimer <sup>-</sup> |
| <i>E0</i>   |                                                | -46.8 |                                                    | -26.6 | -12.6                                          |
| <i>H298</i> |                                                | -45.5 |                                                    | -25.1 | -11.7                                          |
| <i>G298</i> |                                                | -24.4 |                                                    | -12.4 | -5.2                                           |

### Isomers of [P(CN·HCN)<sub>2</sub>]<sup>-</sup>

**Table S10.** Absolute energies in a.u and relative energies in kcal/mol. Red: Energetically preferred isomer.

| isomer | symmetry | connectivity                          | # bonds |    | # bridges |    | E0          | H298        | G298        | ΔE0   | ΔH298 | ΔG298 |
|--------|----------|---------------------------------------|---------|----|-----------|----|-------------|-------------|-------------|-------|-------|-------|
|        |          |                                       | HC      | HN | HC        | HN |             |             |             |       |       |       |
| 1      | C2v      | P(CN HCN) <sub>2</sub>                | 2       |    | 2         |    | -713.582143 | -713.516176 | -713.572563 | 0.00  | 0.00  | 0.00  |
| 2      | Cs       | P(CN) <sub>2</sub> HCN HCN            | 2       |    | 2         |    | -713.576392 | -713.510526 | -713.567165 | 3.61  | 3.55  | 3.39  |
| 3      | Cs       | P(NC HCN) <sub>2</sub>                | 2       |    | 2         |    | -713.514572 | -713.449738 | -713.506767 | 42.40 | 41.69 | 41.29 |
| 4      | Cs       | P(CN HCN)<br>(NC HCN)                 | 2       |    | 1         | 1  | -713.546927 | -713.481522 | -713.538566 | 22.10 | 21.75 | 21.33 |
| 5      | Cs       | (NCH) <sub>2</sub> P(CN) <sub>2</sub> | 2       |    |           |    | -713.572156 | -713.506666 | -713.565751 | 6.27  | 5.97  | 4.27  |



## Starting compounds

**Table S11.** Absolute energies of starting materials in a.u.

| compound                               | PG   | $E^{\text{tot}}$ | $H^{298}$   | $G^{298}$   | Compound              | PG | $E^{\text{tot}}$ | $H^{298}$   | $G^{298}$   |
|----------------------------------------|------|------------------|-------------|-------------|-----------------------|----|------------------|-------------|-------------|
| <b>CN<sup>-</sup></b>                  | Coov | -92.774938       | -92.766741  | -92.789078  | <b>HN<sub>3</sub></b> | Cs | -164.6669066     | -164.643116 | -164.670191 |
| <b>N<sub>3</sub><sup>-</sup></b>       | Dh   | -164.113381      | -164.098688 | -164.122764 | <b>HOCN</b>           | Cs | -168.518954      | -168.492866 | -168.520233 |
| <b>OCN<sup>-</sup></b>                 | Cv   | -168.007184      | -167.992658 | -168.017542 | <b>HNCO</b>           | Cs | -168.564999      | -168.539289 | -168.566347 |
| <b>SCN<sup>-</sup></b>                 | Cv   | -490.915929      | -490.903212 | -490.929601 | <b>HSCN</b>           | Cs | -491.422369      | -491.400819 | -491.430127 |
| <b>OCP<sup>-</sup></b>                 | Cv   | -454.524878      | -454.512572 | -454.538925 | <b>HNCS</b>           | Cs | -491.444115      | -491.420798 | -491.449204 |
| <b>[P(CN)<sub>2</sub>]<sup>-</sup></b> | C2v  | -526.844834      | -526.821755 | -526.855597 | <b>HOCP</b>           | Cs | -455.024182      | -455.000634 | -455.029416 |
| <b>HCN</b>                             | Cv   | -93.344219       | -93.324305  | -93.347142  | <b>HPCO</b>           | Cs | -455.057902      | -455.037532 | -455.066792 |
| <b>CH<sub>2</sub>O</b>                 | Cs   | -114.416980      | -114.386507 | -114.411969 |                       |    |                  |             |             |

## Reaction energies of $X^- + \text{HCN} \rightarrow \text{CN}^- + \text{HX}$

**Table S12.** Reaction energies (pbe0/aug-cc-pVTZ) in kcal/mol.

| reaction                                                                               | $\Delta E^{\text{tot}}$ | $\Delta_R H^{298}$ | $\Delta_R G^{298}$ |
|----------------------------------------------------------------------------------------|-------------------------|--------------------|--------------------|
| <b>N<sub>3</sub><sup>-</sup> + HCN → CN<sup>-</sup> + HN<sub>3</sub></b>               | 9.89                    | 8.24               | 6.67               |
| <b>OCN<sup>-</sup> + HCN → CN<sup>-</sup> + HNCO</b>                                   | 7.20                    | 6.86               | 5.81               |
| <b>OCN<sup>-</sup> + HCN → CN<sup>-</sup> + HOCN</b>                                   | 36.09                   | 35.99              | 34.75              |
| <b>SCN<sup>-</sup> + HCN → CN<sup>-</sup> + HNCS</b>                                   | 25.79                   | 25.09              | 24.13              |
| <b>SCN<sup>-</sup> + HCN → CN<sup>-</sup> + HSCN</b>                                   | 39.43                   | 37.62              | 36.11              |
| <b>OCP<sup>-</sup> + HCN → CN<sup>-</sup> + HPCO</b>                                   | 22.75                   | 20.46              | 18.95              |
| <b>OCP<sup>-</sup> + HCN → CN<sup>-</sup> + HOCP</b>                                   | 43.91                   | 43.61              | 42.40              |
| <b>OCP<sup>-</sup> + 2 HCN → [P(CN)<sub>2</sub>]<sup>-</sup> + CH<sub>2</sub>O</b>     | -30.43                  | -29.54             | -21.56             |
| <b>OCP<sup>-</sup> + 4 HCN → [P(CN·HCN)<sub>2</sub>]<sup>-</sup> + CH<sub>2</sub>O</b> | -61.10                  | -58.29             | -35.79             |
| <b>[P(CN)<sub>2</sub>]<sup>-</sup> + 2 HCN → [P(CN·HCN)<sub>2</sub>]<sup>-</sup></b>   | -30.67                  | -28.75             | -14.23             |

### Structural parameter of computed isomers

**Table S13.** Bond length and bond angles of selected calculated (energetically preferred) isomers.

|                                                     |                  |                  |                   |                    |
|-----------------------------------------------------|------------------|------------------|-------------------|--------------------|
| $\text{N}_3(\text{HCN})_3$ t17<br>(non-planar)      | N1-C1<br>2.941 Å | N1-C2<br>2.941 Å | N3-C3<br>2.971 Å  | N1-N2-C3<br>174.4° |
| $\text{OCN}(\text{HCN})_3$ t17<br>(non-planar)      | N1-C1<br>2.933 Å | N1-C2<br>2.933 Å | O1-C3<br>2.888 Å  | C4-O1-C3<br>136.2° |
| $\text{NCO}(\text{HCN})_3$ t18<br>(planar)          | O1-C1<br>2.902 Å | O1-C2<br>2.902 Å | N1-C3<br>2.905 Å  | C2-N1-C3<br>180.0° |
| $\text{SCN}(\text{HCN})_2$ d7<br>(planar)           | N1-C1<br>2.956 Å | N1-C2<br>2.956 Å |                   |                    |
| $\text{NCH}-(\text{SCN})-\text{HCN}$<br>d1 (planar) | S1-C1<br>3.408 Å | N1-C2<br>2.926 Å | C1-S1-C3<br>92.7° | C3-N1-C2<br>174.7° |

# Optimized structures (pbe0-D3/aug-cc-pVTZ)

## [N<sub>3</sub>(HCN)<sub>n</sub>]<sup>-</sup>

M1

|   |             |             |             |
|---|-------------|-------------|-------------|
| C | 1.98560000  | -0.00030000 | 0.00020000  |
| N | -2.57290000 | -0.61850000 | -0.00010000 |
| N | -1.64370000 | 0.07800000  | 0.00010000  |
| N | -0.70820000 | 0.80050000  | -0.00010000 |
| N | 3.09700000  | -0.30090000 | -0.00010000 |
| H | 0.88090000  | 0.28780000  | 0.00030000  |

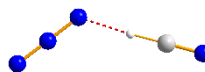

M2

|   |             |             |             |
|---|-------------|-------------|-------------|
| N | -2.32605800 | -0.69093200 | -0.00006000 |
| N | -1.46361100 | 0.05573500  | 0.00006600  |
| N | -0.61442000 | 0.90255300  | 0.00005400  |
| H | 0.45496200  | 0.50487300  | -0.00020300 |
| N | 1.83359600  | 0.01056400  | -0.00037900 |
| C | 2.92308300  | -0.40838600 | 0.00040500  |

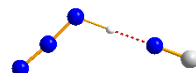

D1

|   |             |             |             |
|---|-------------|-------------|-------------|
| C | -0.00480000 | -0.00960000 | -4.39274300 |
| C | -0.00160000 | -0.00480000 | -0.20842900 |
| N | -0.03680000 | -0.08320000 | 4.89344600  |
| N | 0.00480000  | 0.00960000  | 3.73273800  |
| N | 0.05120000  | 0.11360000  | 2.55532900  |
| N | 0.00000000  | 0.00000000  | -5.54043200 |
| N | -0.01280000 | -0.02720000 | -1.35751100 |
| H | -0.00800000 | -0.01760000 | -3.30103300 |
| H | 0.00640000  | 0.01440000  | 0.92308200  |

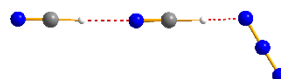

D2

|   |             |             |             |
|---|-------------|-------------|-------------|
| C | -4.18123200 | -0.13489600 | -0.01688000 |
| N | 4.08731800  | -0.94528700 | 0.00055800  |
| N | 3.34523500  | -0.08479000 | 0.00754700  |
| N | 2.64316500  | 0.89651800  | 0.01382100  |
| N | -5.32584000 | -0.23673800 | 0.03123700  |
| H | -3.06484100 | -0.03230500 | -0.03515000 |
| H | 1.58171200  | 0.65360400  | 0.00529700  |
| N | 0.01924100  | 0.27933400  | -0.01201100 |
| C | -1.13555400 | 0.13746900  | -0.02615400 |

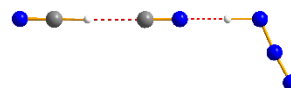

D3

|   |             |             |             |
|---|-------------|-------------|-------------|
| N | -3.96746800 | -1.00075700 | 0.00134700  |
| N | -3.27331400 | -0.10186100 | -0.00376800 |
| N | -2.61359700 | 0.90783200  | -0.00952100 |
| H | 2.84005400  | -0.01440600 | 0.00163500  |
| H | -1.53672000 | 0.70591200  | 0.00259500  |
| C | 0.14552800  | 0.39182700  | 0.01799700  |
| N | 1.29222400  | 0.21171900  | 0.00428700  |
| N | 3.91229800  | -0.16790600 | -0.00229600 |
| C | 5.06208300  | -0.33094300 | -0.00709200 |

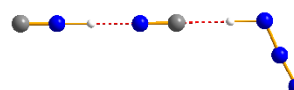

D4

|   |             |             |             |
|---|-------------|-------------|-------------|
| N | -4.38255900 | -0.63562500 | 0.00039600  |
| N | -3.39361900 | -0.04726700 | -0.00079700 |
| N | -2.39399400 | 0.56967500  | -0.00220600 |
| H | 3.07210500  | -0.00856100 | 0.00713600  |
| H | -1.00935400 | 0.37867300  | -0.00143200 |
| N | 4.11905700  | -0.13148700 | 0.00143400  |
| C | 5.27225100  | -0.26384300 | -0.00420100 |
| C | 1.28425300  | 0.15545800  | 0.00299700  |
| N | 0.13657600  | 0.28473100  | 0.00139100  |

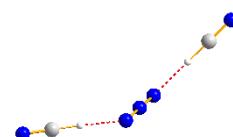

|    |             |             |             |
|----|-------------|-------------|-------------|
| D5 |             |             |             |
| N  | -4.93874300 | -0.12999800 | -0.18173000 |
| H  | 2.72894700  | -0.22011700 | 0.00273900  |
| N  | -0.01020800 | -0.03397200 | 0.17750700  |
| N  | -0.98809800 | 0.59397100  | 0.20560800  |
| N  | 0.98387700  | -0.64503000 | 0.15506900  |
| N  | 4.94013700  | 0.19733700  | -0.18542100 |
| C  | 3.81652800  | -0.02391800 | -0.08869300 |
| C  | -3.80509500 | 0.04586100  | -0.10806800 |
| H  | -2.70629700 | 0.21230600  | -0.01940600 |

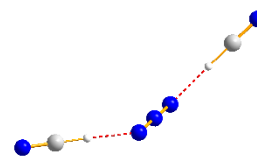

|    |             |             |             |
|----|-------------|-------------|-------------|
| D6 |             |             |             |
| H  | 2.64763500  | -0.20588300 | 0.03911800  |
| N  | -0.12018100 | 0.09085200  | 0.10590800  |
| N  | -1.11053600 | 0.71454100  | 0.06339100  |
| N  | 0.87922300  | -0.50516800 | 0.15374400  |
| N  | 4.88040800  | 0.06181800  | -0.12793500 |
| C  | 3.74355100  | -0.08151400 | -0.04293000 |
| H  | -2.60318700 | 0.21646200  | -0.03377200 |
| C  | -4.77729600 | -0.30520400 | -0.10572100 |
| N  | -3.64919700 | -0.03208200 | -0.06845700 |

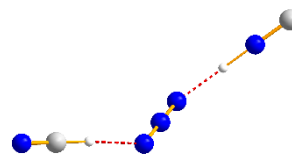

|    |             |             |             |
|----|-------------|-------------|-------------|
| D7 |             |             |             |
| H  | -2.21114200 | 0.10261200  | 0.02775800  |
| N  | 0.00166200  | 1.28068600  | 0.03078500  |
| N  | 1.16703400  | 1.30011900  | -0.00932500 |
| N  | -1.16536700 | 1.30318700  | -0.01330900 |
| H  | 2.20770200  | 0.09225000  | -0.05175800 |
| C  | 3.75325200  | -1.50863400 | 0.01733800  |
| N  | 2.95750700  | -0.66278900 | -0.01574000 |
| N  | -2.96430100 | -0.65770900 | -0.00410200 |
| C  | -3.74863600 | -1.51458600 | 0.00030300  |

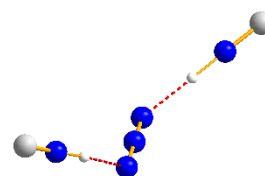

|    |             |             |             |
|----|-------------|-------------|-------------|
| D8 |             |             |             |
| C  | -2.05161495 | -1.79780401 | -0.58847575 |
| C  | -6.25727342 | 0.64821573  | -0.58847575 |
| N  | -3.45737342 | 0.64821573  | -0.58847575 |
| N  | -2.78209911 | 1.82319303  | -0.58847575 |
| N  | -2.16821338 | 2.89135421  | -0.58847575 |
| N  | -1.48621224 | -2.78160473 | -0.58847575 |
| N  | -7.42497342 | 0.64821573  | -0.58847575 |
| H  | -2.65015354 | -0.75634686 | -0.58847575 |
| H  | -5.05607342 | 0.64821573  | -0.58847575 |

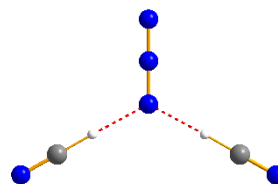

|    |             |             |             |
|----|-------------|-------------|-------------|
| D9 |             |             |             |
| C  | -2.21661495 | -1.79780401 | -0.58847575 |
| N  | -3.62237342 | 0.64821573  | -0.58847575 |
| N  | -2.94709911 | 1.82319303  | -0.58847575 |
| N  | -2.33321338 | 2.89135421  | -0.58847575 |
| N  | -1.65121224 | -2.78160473 | -0.58847575 |
| H  | -2.81515354 | -0.75634686 | -0.58847575 |
| H  | -5.22107342 | 0.64821573  | -0.58847575 |
| N  | -6.42227342 | 0.64821573  | -0.58847575 |
| C  | -7.56227342 | 0.64821573  | -0.58847575 |

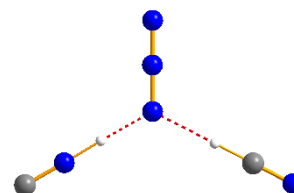

|     |             |             |             |
|-----|-------------|-------------|-------------|
| D10 |             |             |             |
| N   | -3.52271665 | 0.47481294  | -0.58847575 |
| N   | -2.84744234 | 1.64979024  | -0.58847575 |
| N   | -2.23355661 | 2.71795142  | -0.58847575 |
| H   | -2.71549677 | -0.92974965 | -0.58847575 |
| H   | -5.12141665 | 0.47481294  | -0.58847575 |
| N   | -6.32261665 | 0.47481294  | -0.58847575 |
| C   | -7.46261665 | 0.47481294  | -0.58847575 |
| C   | -1.54891456 | -2.95960270 | -0.58847575 |
| N   | -2.11695818 | -1.97120680 | -0.58847575 |

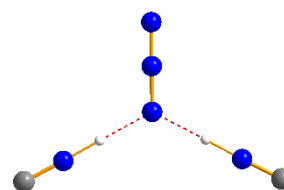

|    |             |             |             |
|----|-------------|-------------|-------------|
| T1 |             |             |             |
| C  | 2.08232400  | -0.14010000 | -0.00023800 |
| C  | -1.89178700 | -0.51466800 | 0.00007300  |
| N  | -5.87590400 | 1.19836900  | 0.00000200  |
| N  | -5.25695200 | 0.24595200  | 0.00001300  |
| N  | -4.67988300 | -0.81296900 | 0.00008900  |
| N  | -0.73595900 | -0.39497700 | 0.00009100  |
| H  | 0.95295400  | -0.23970000 | -0.00010000 |
| H  | -3.58797200 | -0.69892800 | 0.00006400  |
| C  | 6.27337000  | 0.20984600  | 0.00008300  |
| N  | 3.22639200  | -0.04046800 | -0.00037300 |
| N  | 7.41715100  | 0.30211500  | 0.00026700  |
| H  | 5.18765700  | 0.12199900  | -0.00009300 |

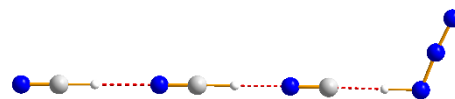

|    |             |             |             |
|----|-------------|-------------|-------------|
| T2 |             |             |             |
| C  | -2.14372900 | -0.14650100 | 0.00007800  |
| N  | 5.85736200  | 1.21901800  | 0.00003100  |
| N  | 5.23436900  | 0.27129800  | -0.00006500 |
| N  | 4.66831000  | -0.79533500 | -0.00019700 |
| H  | -1.00066500 | -0.25001300 | 0.00014800  |
| H  | 3.59663200  | -0.70095300 | -0.00009400 |
| C  | -6.33096900 | 0.21522000  | -0.00006100 |
| N  | -3.28828800 | -0.04430700 | 0.00001400  |
| N  | -7.47447200 | 0.31128900  | -0.00008700 |
| H  | -5.24507900 | 0.12381900  | -0.00003700 |
| N  | 1.95777400  | -0.54209900 | 0.00008600  |
| C  | 0.80198600  | -0.42070100 | 0.00023500  |

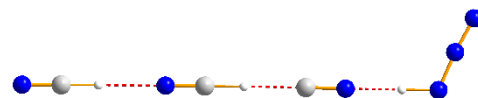

|    |             |             |             |
|----|-------------|-------------|-------------|
| T3 |             |             |             |
| N  | 5.79490400  | 1.19747100  | -0.00008200 |
| N  | 5.17314400  | 0.24946200  | 0.00022900  |
| N  | 4.60084900  | -0.81520200 | 0.00068200  |
| H  | -0.80733500 | -0.25516000 | -0.00048200 |
| H  | 3.52814700  | -0.70317100 | 0.00058300  |
| C  | -6.24730200 | 0.21817400  | 0.00031100  |
| N  | -7.39144400 | 0.31381200  | 0.00065600  |
| H  | -5.15336300 | 0.12638100  | -0.00003000 |
| C  | -3.09850800 | -0.04946400 | -0.00058400 |
| C  | 1.76619200  | -0.50384600 | -0.00012300 |
| N  | -1.94491600 | -0.15180800 | -0.00064200 |
| N  | 0.61178700  | -0.38762500 | -0.00051400 |

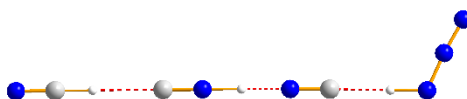

|    |             |             |             |
|----|-------------|-------------|-------------|
| T4 |             |             |             |
| N  | 5.85452900  | 1.20517800  | 0.00003200  |
| N  | 5.22881200  | 0.26536400  | -0.00007700 |
| N  | 4.67402600  | -0.81597000 | -0.00021600 |
| H  | -0.47139300 | -0.28824100 | 0.00006100  |
| H  | 3.63776300  | -0.71863300 | 0.00020200  |
| H  | -5.22271400 | 0.12148900  | 0.00000200  |
| C  | -6.33694900 | 0.21295400  | -0.00006300 |
| C  | -3.28128600 | -0.03985400 | 0.00007100  |
| C  | 0.66848100  | -0.39534200 | 0.00011500  |
| N  | -7.48279700 | 0.30632700  | -0.00011400 |
| N  | -2.12122900 | -0.13861000 | 0.00009000  |
| N  | 1.81164000  | -0.50531200 | 0.00014100  |

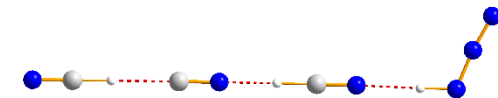

|    |             |             |             |
|----|-------------|-------------|-------------|
| T5 |             |             |             |
| N  | 5.79336000  | 1.18751600  | 0.00004300  |
| N  | 5.17145900  | 0.23768000  | -0.00008900 |
| N  | 4.59305100  | -0.82123300 | -0.00017800 |
| H  | -1.00970700 | -0.23356000 | -0.00005200 |
| H  | 3.50663000  | -0.70526500 | 0.00012300  |
| H  | -5.02409800 | 0.12439200  | -0.00003700 |
| C  | 1.79446600  | -0.51285400 | 0.00038100  |
| N  | 0.63889000  | -0.39048700 | 0.00002800  |
| N  | -6.05698700 | 0.21286400  | -0.00001600 |
| N  | -3.29164600 | -0.02639800 | -0.00007400 |
| C  | -7.21397700 | 0.31142400  | 0.00002400  |
| C  | -2.14877600 | -0.12943000 | -0.00007500 |

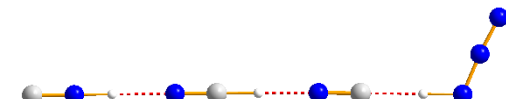

|    |             |             |             |
|----|-------------|-------------|-------------|
| T6 |             |             |             |
| N  | 5.76640300  | 1.21116300  | 0.00004000  |
| N  | 5.14323300  | 0.26412400  | -0.00008300 |
| N  | 4.57810300  | -0.80376600 | -0.00025900 |
| H  | -1.04721000 | -0.24531100 | 0.00021200  |
| H  | 3.51011200  | -0.70877100 | -0.00008900 |
| H  | -5.07480200 | 0.12679500  | -0.00003600 |
| C  | 0.70264500  | -0.41817800 | 0.00027000  |
| N  | 1.85732500  | -0.54431700 | 0.00010600  |
| C  | -7.26506600 | 0.32207300  | -0.00015500 |
| C  | -2.20503800 | -0.13580800 | 0.00013500  |
| N  | -6.10846000 | 0.21919500  | -0.00009300 |
| N  | -3.34850900 | -0.02943200 | 0.00006300  |

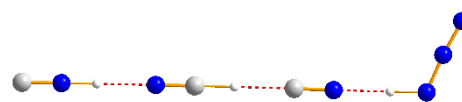

|    |             |             |             |
|----|-------------|-------------|-------------|
| T7 |             |             |             |
| N  | 5.79137600  | 1.19396900  | -0.00001600 |
| N  | 5.16382100  | 0.25580500  | 0.00004200  |
| N  | 4.60753600  | -0.82545400 | 0.00013200  |
| H  | -0.53730100 | -0.28091800 | -0.00009900 |
| H  | 3.57330500  | -0.72571300 | 0.00006300  |
| H  | -5.03993400 | 0.12029800  | -0.00000100 |
| C  | 0.59064300  | -0.39004100 | -0.00008200 |
| N  | 1.73286500  | -0.50276200 | -0.00006700 |
| C  | -7.29403400 | 0.31263500  | 0.00011900  |
| N  | -6.13599400 | 0.21405900  | 0.00005400  |
| N  | -2.22700800 | -0.12344300 | -0.00010500 |
| C  | -3.38398300 | -0.02240900 | -0.00007800 |

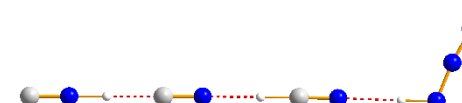

|    |             |             |             |
|----|-------------|-------------|-------------|
| T8 |             |             |             |
| N  | 5.74509300  | 1.18011500  | -0.00000400 |
| N  | 5.11763800  | 0.23955000  | -0.00021900 |
| N  | 4.54985200  | -0.83247100 | -0.00048800 |
| H  | -0.66275800 | -0.26555400 | 0.00094400  |
| H  | 3.50073300  | -0.72046700 | -0.00092100 |
| H  | -4.94140500 | 0.12407100  | -0.00022100 |
| C  | -7.17158300 | 0.31976600  | -0.00058800 |
| N  | -6.01417100 | 0.21844600  | -0.00040900 |
| N  | -2.06834800 | -0.13328100 | 0.00041500  |
| C  | -3.22300800 | -0.02864100 | 0.00010700  |
| C  | 1.63213800  | -0.49314700 | 0.00052900  |
| N  | 0.48110000  | -0.37606200 | 0.00069200  |

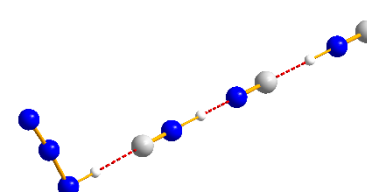

|    |             |             |             |
|----|-------------|-------------|-------------|
| T9 |             |             |             |
| H  | 4.37642100  | -0.30970200 | 0.21678400  |
| N  | 1.84369100  | 0.83970400  | 0.14707100  |
| N  | 0.90435000  | 1.28192400  | -0.39701700 |
| N  | 2.78197900  | 0.41639800  | 0.69182000  |
| N  | 6.38969800  | -1.20219000 | -0.26674800 |
| C  | 5.36438700  | -0.74814200 | -0.01671200 |
| H  | -0.67731200 | 0.77747400  | -0.25456200 |
| C  | -5.84197900 | -0.55929200 | 0.03930300  |
| H  | -4.78445400 | -0.30368700 | -0.01388900 |
| N  | -6.95637000 | -0.82729700 | 0.09472100  |
| N  | -2.87862000 | 0.17595400  | -0.11831000 |
| C  | -1.77370000 | 0.48151300  | -0.19077500 |

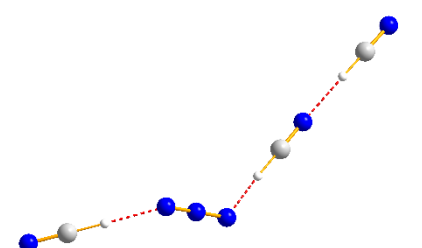

|     |             |             |             |
|-----|-------------|-------------|-------------|
| T10 |             |             |             |
| H   | -4.21152600 | -0.25846800 | -0.27188400 |
| N   | -1.99669300 | 0.91915400  | -0.10581900 |
| N   | -1.03754300 | 1.22618200  | 0.48343200  |
| N   | -2.95780600 | 0.63793400  | -0.70671600 |
| H   | 0.58613900  | 0.72631900  | 0.29931700  |
| C   | 5.76584000  | -0.53274700 | -0.07174400 |
| H   | 4.70670500  | -0.29322300 | -0.00510600 |
| N   | 6.88324800  | -0.78382600 | -0.14145100 |
| N   | 2.78248200  | 0.16396200  | 0.12536800  |
| C   | 1.67424900  | 0.44889500  | 0.21750800  |
| C   | -5.99305500 | -1.48346300 | 0.27491900  |
| N   | -5.06847700 | -0.84494100 | -0.01859000 |

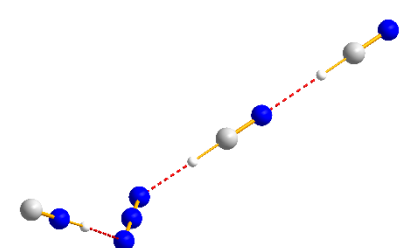

|     |             |             |             |
|-----|-------------|-------------|-------------|
| T11 |             |             |             |
| H   | 4.20880400  | -0.43602900 | 0.17170000  |
| N   | 1.70340800  | 1.00690800  | 0.14963600  |
| N   | 0.78376700  | 1.58302600  | -0.30886100 |
| N   | 2.62605800  | 0.47451700  | 0.59855700  |
| H   | -0.51729800 | 1.07625500  | -0.23234200 |
| C   | -5.67576400 | -0.73686300 | 0.03294000  |
| H   | -4.63518200 | -0.38879100 | -0.01692400 |
| N   | -6.76418000 | -1.09880800 | 0.08461500  |
| N   | 6.14876700  | -1.48916500 | -0.23491000 |
| N   | -1.60940000 | 0.69092900  | -0.18445800 |
| C   | 5.15594200  | -0.95223200 | -0.02436600 |
| C   | -2.69272200 | 0.28521500  | -0.11765600 |

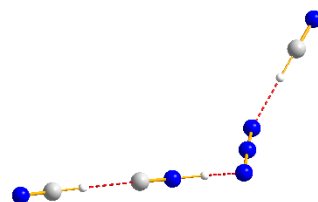

|     |             |             |             |
|-----|-------------|-------------|-------------|
| T12 |             |             |             |
| H   | -4.07367300 | 0.37062900  | 0.24813000  |
| N   | -1.86419900 | -0.97433800 | 0.14725700  |
| N   | -0.93741700 | -1.42290100 | -0.41118800 |
| N   | -2.79590500 | -0.56582400 | 0.70668600  |
| H   | 0.45485800  | -0.93226200 | -0.29473700 |
| C   | 5.66036600  | 0.63572800  | 0.05986800  |
| H   | 4.60829900  | 0.33903700  | -0.00694400 |
| N   | 6.76376200  | 0.94465500  | 0.12922600  |
| N   | 1.51604400  | -0.60336100 | -0.22930400 |
| C   | 2.61527200  | -0.25009300 | -0.14259100 |
| C   | -5.83677700 | 1.59575400  | -0.30074800 |
| N   | -4.91409100 | 0.95523600  | -0.00633700 |

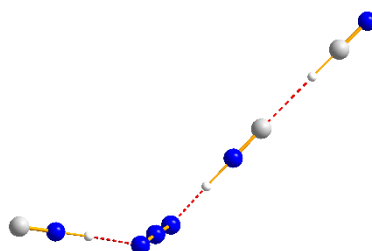

|     |             |             |             |
|-----|-------------|-------------|-------------|
| T13 |             |             |             |
| H   | 4.28656100  | -0.31339100 | 0.20379700  |
| N   | 1.73011400  | 0.84690300  | 0.14912500  |
| N   | 0.79487900  | 1.32640400  | -0.37283600 |
| N   | 2.66319800  | 0.38852000  | 0.67040200  |
| H   | -0.73526000 | 0.80237800  | -0.24293400 |
| H   | -4.60613100 | -0.31600600 | -0.01761900 |
| N   | -5.60537400 | -0.58798000 | 0.03496200  |
| N   | -2.93493700 | 0.15167100  | -0.11107100 |
| N   | 6.31547900  | -1.16991900 | -0.26674700 |
| C   | -6.72504100 | -0.89016600 | 0.09271100  |
| C   | -1.83737200 | 0.48049600  | -0.18115000 |
| C   | 5.28096600  | -0.73402700 | -0.02324300 |

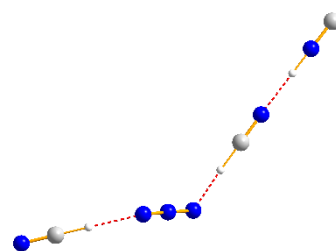

|     |             |             |             |
|-----|-------------|-------------|-------------|
| T14 |             |             |             |
| H   | -4.12177000 | 0.25644400  | 0.26658700  |
| N   | -1.88520100 | -0.92369200 | 0.11091000  |
| N   | -0.93097500 | -1.25354400 | -0.47640500 |
| N   | -2.84016200 | -0.62065900 | 0.70803900  |
| H   | 0.64561800  | -0.73417900 | -0.29872100 |
| H   | 4.53152200  | 0.30509900  | 0.00164300  |
| N   | 5.53329600  | 0.55322600  | 0.07225400  |
| N   | 2.83919900  | -0.12872500 | -0.12375200 |
| C   | 6.65858600  | 0.82897600  | 0.15035300  |
| C   | 1.73745800  | -0.43443900 | -0.21619200 |
| C   | -5.92346200 | 1.44249200  | -0.28288300 |
| N   | -4.98628000 | 0.82346000  | 0.01221300  |

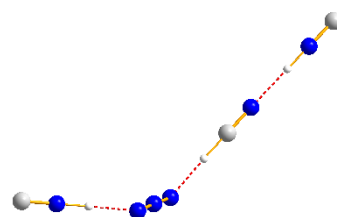

|     |             |             |             |
|-----|-------------|-------------|-------------|
| T15 |             |             |             |
| H   | 4.19604300  | -0.53865000 | 0.00099400  |
| N   | 1.51521800  | 1.11090500  | 0.00144100  |
| N   | 0.59938300  | 1.87886500  | -0.00180100 |
| N   | 2.44373800  | 0.45186400  | 0.00449000  |
| H   | -0.40679300 | 1.40679800  | -0.00183800 |
| H   | -4.37404500 | -0.44375500 | -0.00033100 |
| N   | -5.36425500 | -0.89184200 | 0.00025200  |
| C   | -6.42416300 | -1.36807700 | 0.00090800  |
| N   | -1.78460000 | 0.76226900  | -0.00181100 |
| N   | 6.18517100  | -1.54407100 | -0.00181700 |
| C   | -2.83239000 | 0.26389100  | -0.00122700 |
| C   | 5.16025500  | -1.02920100 | -0.00036400 |

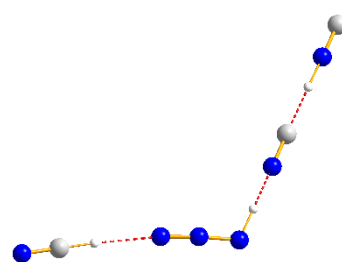

| T16 |             |             |             |
|-----|-------------|-------------|-------------|
| H   | 3.97106700  | -0.38131700 | 0.23186300  |
| N   | 1.72883900  | 0.99367600  | 0.15141100  |
| N   | 0.81007500  | 1.48776300  | -0.38798200 |
| N   | 2.65196000  | 0.54652500  | 0.68747600  |
| H   | -0.49441500 | 0.98364200  | -0.28672900 |
| H   | -4.38530600 | -0.35719300 | -0.01182200 |
| N   | -5.38276300 | -0.68229100 | 0.05644800  |
| C   | -6.48622900 | -1.03748300 | 0.13082800  |
| N   | -1.58441500 | 0.60785100  | -0.22160500 |
| C   | -2.67028000 | 0.21983300  | -0.13462600 |
| C   | 5.75791100  | -1.56591600 | -0.30125500 |
| N   | 4.81919700  | -0.94548500 | -0.01474800 |

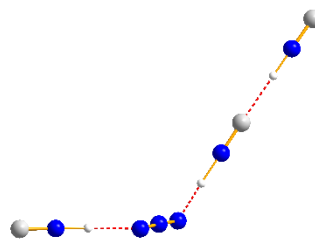

| T17 |             |             |             |
|-----|-------------|-------------|-------------|
| C   | 2.50621700  | -2.41486400 | -0.02080000 |
| C   | -2.49078700 | -2.42980400 | -0.02080000 |
| N   | 0.00307300  | -0.87085300 | 0.00320000  |
| N   | 0.00000000  | 0.30707400  | 0.05920000  |
| N   | 3.47527100  | -3.03170600 | -0.02880000 |
| N   | -3.45611000 | -3.05247300 | -0.02880000 |
| H   | 1.57499100  | -1.81727000 | -0.01120000 |
| H   | -1.56318600 | -1.82660700 | -0.01120000 |
| C   | -0.01511400 | 4.43251100  | -0.02240000 |
| N   | -0.00295500 | 1.46416500  | 0.11840000  |
| N   | -0.01969900 | 5.58053500  | -0.06720000 |
| H   | -0.01076200 | 3.33961900  | 0.01760000  |

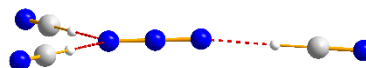

| T18 |             |             |             |
|-----|-------------|-------------|-------------|
| C   | -2.25048800 | 2.48049100  | -0.15691500 |
| C   | -2.26441400 | -2.47447500 | -0.15670900 |
| N   | -0.65629700 | -0.00165200 | 0.16866200  |
| N   | 0.45731300  | -0.00083400 | 0.53556600  |
| N   | -2.88745700 | 3.42802100  | -0.28010500 |
| N   | -2.90715600 | -3.41811800 | -0.27974700 |
| H   | -1.63803400 | 1.57280900  | -0.03598700 |
| H   | -1.64642500 | -1.57060600 | -0.03571000 |
| N   | 1.55274600  | 0.00013700  | 0.92193100  |
| H   | 3.03816600  | -0.00350300 | 0.19927100  |
| N   | 4.00490200  | -0.00565700 | -0.22011400 |
| C   | 5.06455800  | -0.00801100 | -0.69486300 |

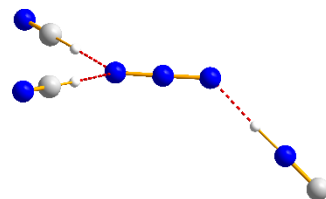

| T19 |             |             |             |
|-----|-------------|-------------|-------------|
| N   | -0.88059800 | 0.13073800  | 0.12169400  |
| N   | 0.26923800  | 0.07483500  | 0.38076200  |
| H   | -1.65448000 | 1.54747400  | -0.02905800 |
| H   | -1.87760100 | -1.43433900 | -0.02588100 |
| N   | 1.39128100  | 0.00721700  | 0.64440300  |
| H   | 3.20685300  | -0.08073600 | 0.11502500  |
| C   | -2.75866500 | 3.47021700  | -0.23922600 |
| N   | -2.19001200 | 2.46305800  | -0.13211000 |
| C   | 4.26932500  | -0.13828300 | -0.13640900 |
| N   | 5.38394600  | -0.19949800 | -0.40406600 |
| N   | -3.09812300 | -3.31803600 | -0.20083800 |
| C   | -2.47814200 | -2.35536600 | -0.11253400 |

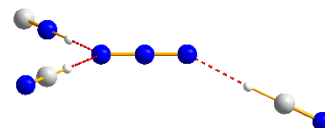

| T20 |             |             |             |
|-----|-------------|-------------|-------------|
| C   | -2.38541200 | -2.33200700 | -0.13995700 |
| N   | -0.72425900 | 0.13317500  | 0.15432800  |
| N   | 0.39610700  | 0.07791800  | 0.50492400  |
| N   | -3.03096700 | -3.27538700 | -0.24734100 |
| H   | -1.53482200 | 1.55666100  | -0.04174100 |
| H   | -1.76378400 | -1.43178800 | -0.03416100 |
| N   | 1.49196300  | 0.01192200  | 0.87143900  |
| H   | 3.02159800  | -0.08783600 | 0.18410900  |
| N   | 3.99269100  | -0.15477700 | -0.20092000 |
| C   | 5.06551400  | -0.23025700 | -0.63849700 |
| C   | -2.68019000 | 3.43916500  | -0.30379100 |
| N   | -2.08588700 | 2.45022900  | -0.17025000 |

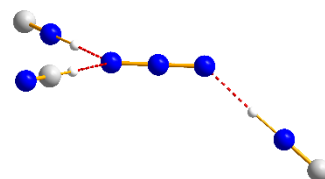



| T21 |             |             |             |
|-----|-------------|-------------|-------------|
| N   | -0.81434500 | 0.00003100  | 0.14438500  |
| N   | 0.31660700  | -0.00031100 | 0.47511400  |
| H   | -1.65539100 | -1.43051100 | -0.03827000 |
| H   | -1.65496700 | 1.43087100  | -0.03827500 |
| N   | 1.41769700  | -0.00067600 | 0.81885400  |
| H   | 2.99472300  | -0.00056700 | 0.16934400  |
| N   | 3.97455000  | -0.00023200 | -0.18226200 |
| C   | 5.06436700  | 0.00022600  | -0.58268400 |
| C   | -2.79238200 | -3.31698200 | -0.27119900 |
| N   | -2.20235500 | -2.32362000 | -0.15266400 |
| N   | -2.20170700 | 2.32411800  | -0.15254600 |
| C   | -2.79156500 | 3.31759500  | -0.27094300 |

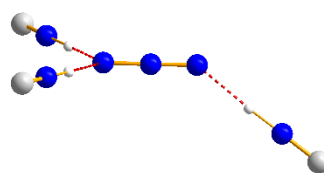

| T22 |             |             |             |
|-----|-------------|-------------|-------------|
| N   | -0.96346800 | 0.00002400  | 0.10035900  |
| N   | 0.20056500  | -0.00049100 | 0.31112600  |
| H   | -1.77926800 | -1.42158000 | -0.02329000 |
| H   | -1.77835000 | 1.42215400  | -0.02319900 |
| N   | 1.33134000  | -0.00101300 | 0.52452900  |
| H   | 3.20213500  | -0.00044000 | 0.08975700  |
| C   | -2.88883100 | -3.33928600 | -0.18773000 |
| N   | -2.31697300 | -2.33181200 | -0.10380000 |
| N   | -2.31548300 | 2.33272400  | -0.10367300 |
| C   | -2.88667400 | 3.34058300  | -0.18753400 |
| N   | 5.40191900  | -0.00025900 | -0.31995800 |
| C   | 4.27386700  | -0.00035400 | -0.10862800 |

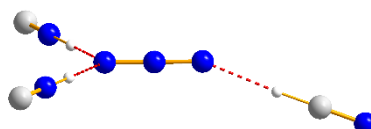

### [OCN(HCN)<sub>n</sub>]<sup>-</sup>

| M1 |             |             |            |
|----|-------------|-------------|------------|
| C  | -0.50674500 | 1.60161100  | 0.00000000 |
| C  | 0.56057600  | -1.86546600 | 0.00000000 |
| H  | 0.00000000  | -0.89329200 | 0.00000000 |
| N  | 1.12908100  | -2.86505100 | 0.00000000 |
| N  | -0.09505500 | 2.70481700  | 0.00000000 |
| O  | -0.94514600 | 0.44975700  | 0.00000000 |

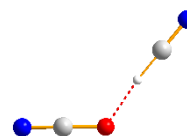

| M2 |            |            |             |
|----|------------|------------|-------------|
| C  | 0.00000000 | 0.00000000 | 1.75209700  |
| C  | 0.00000000 | 0.00000000 | -2.23166200 |
| H  | 0.00000000 | 0.00000000 | -1.09198400 |
| N  | 0.00000000 | 0.00000000 | -3.38305800 |
| O  | 0.00000000 | 0.00000000 | 2.96040000  |
| N  | 0.00000000 | 0.00000000 | 0.56679700  |

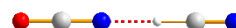

| M3 |             |             |            |
|----|-------------|-------------|------------|
| C  | -0.56205300 | 1.44635300  | 0.00000000 |
| H  | 0.00000000  | -0.83328800 | 0.00000000 |
| N  | 0.64384300  | -1.71780400 | 0.00000000 |
| C  | 1.32389100  | -2.65910700 | 0.00000000 |
| N  | -0.22788300 | 2.57174200  | 0.00000000 |
| O  | -0.93534400 | 0.26653100  | 0.00000000 |

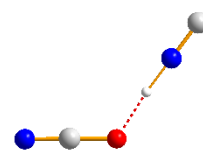

| M4 |            |            |             |
|----|------------|------------|-------------|
| C  | 0.00000000 | 0.00000000 | 1.61807900  |
| H  | 0.00000000 | 0.00000000 | -0.94638000 |
| O  | 0.00000000 | 0.00000000 | 2.82080300  |
| N  | 0.00000000 | 0.00000000 | 0.43685900  |
| N  | 0.00000000 | 0.00000000 | -2.10852700 |
| C  | 0.00000000 | 0.00000000 | -3.27114200 |

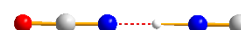

|    |            |             |             |
|----|------------|-------------|-------------|
| D1 |            |             |             |
| C  | 0.00000000 | 0.00000000  | 1.70457600  |
| C  | 0.00000000 | 2.47217600  | -0.95112100 |
| C  | 0.00000000 | -2.47217600 | -0.95112100 |
| O  | 0.00000000 | 0.00000000  | 0.46370700  |
| N  | 0.00000000 | 0.00000000  | 2.87699300  |
| H  | 0.00000000 | 1.53504000  | -0.36648500 |
| H  | 0.00000000 | -1.53504000 | -0.36648500 |
| N  | 0.00000000 | 3.44206600  | -1.56640300 |
| N  | 0.00000000 | -3.44206600 | -1.56640300 |

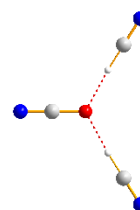

|    |            |             |             |
|----|------------|-------------|-------------|
| D2 |            |             |             |
| C  | 0.00000000 | 0.00000000  | 1.78974300  |
| H  | 0.00000000 | 1.43165600  | -0.43498600 |
| H  | 0.00000000 | -1.43165600 | -0.43498600 |
| N  | 0.00000000 | 0.00000000  | 0.59743600  |
| O  | 0.00000000 | 0.00000000  | 2.98751800  |
| C  | 0.00000000 | 2.33346500  | -1.09733800 |
| N  | 0.00000000 | 3.26571300  | -1.77018800 |
| N  | 0.00000000 | -3.26571300 | -1.77018800 |
| C  | 0.00000000 | -2.33346500 | -1.09733800 |

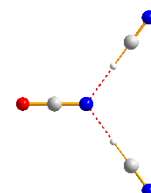

|    |             |             |            |
|----|-------------|-------------|------------|
| D3 |             |             |            |
| C  | -0.31830400 | 1.64531900  | 0.00000000 |
| C  | -2.08923400 | -1.54404400 | 0.00000000 |
| O  | 0.00000000  | 0.44226100  | 0.00000000 |
| N  | -0.62984500 | 2.77316300  | 0.00000000 |
| H  | -1.31270200 | -0.76617400 | 0.00000000 |
| H  | 1.48560500  | 0.03451300  | 0.00000000 |
| N  | -2.89652900 | -2.36050100 | 0.00000000 |
| N  | 2.49020300  | -0.30987300 | 0.00000000 |
| C  | 3.58758700  | -0.68893300 | 0.00000000 |

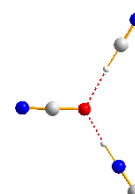

|    |             |             |            |
|----|-------------|-------------|------------|
| D4 |             |             |            |
| C  | -0.40517900 | 1.70344700  | 0.00000000 |
| H  | -1.14649400 | -0.82909800 | 0.00000000 |
| H  | 1.42125000  | 0.00836400  | 0.00000000 |
| N  | 2.42945800  | -0.41482900 | 0.00000000 |
| C  | 3.50896800  | -0.84389600 | 0.00000000 |
| N  | 0.00000000  | 0.58195000  | 0.00000000 |
| O  | -0.82896900 | 2.81942000  | 0.00000000 |
| C  | -1.85238900 | -1.68596700 | 0.00000000 |
| N  | -2.59394300 | -2.56371100 | 0.00000000 |

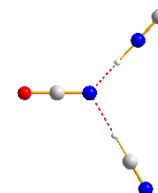

|    |            |             |             |
|----|------------|-------------|-------------|
| D5 |            |             |             |
| C  | 0.00000000 | 0.00000000  | 1.63662500  |
| O  | 0.00000000 | 0.00000000  | 0.38881800  |
| N  | 0.00000000 | 0.00000000  | 2.80475000  |
| H  | 0.00000000 | 1.37550100  | -0.38289300 |
| H  | 0.00000000 | -1.37550100 | -0.38289300 |
| N  | 0.00000000 | -2.26911100 | -0.93959400 |
| C  | 0.00000000 | -3.25434900 | -1.55362000 |
| C  | 0.00000000 | 3.25434900  | -1.55362000 |
| N  | 0.00000000 | 2.26911100  | -0.93959400 |

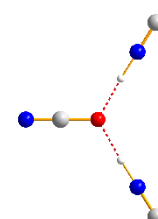

|    |            |             |             |
|----|------------|-------------|-------------|
| D6 |            |             |             |
| C  | 0.00000000 | 0.00000000  | 1.67849100  |
| H  | 0.00000000 | 1.29227300  | -0.43764000 |
| H  | 0.00000000 | -1.29227300 | -0.43764000 |
| N  | 0.00000000 | -2.16690500 | -1.06478400 |
| C  | 0.00000000 | -3.12651500 | -1.71890600 |
| C  | 0.00000000 | 3.12651500  | -1.71890600 |
| N  | 0.00000000 | 2.16690500  | -1.06478400 |
| N  | 0.00000000 | 0.00000000  | 0.48430400  |
| O  | 0.00000000 | 0.00000000  | 2.86850700  |

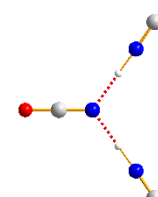

|    |             |             |            |
|----|-------------|-------------|------------|
| D7 |             |             |            |
| C  | 0.00000000  | 0.19987900  | 0.00000000 |
| C  | -4.05719800 | 0.94706300  | 0.00000000 |
| C  | 3.40236300  | -0.89005200 | 0.00000000 |
| O  | 2.23257400  | -1.28856400 | 0.00000000 |
| H  | -2.96724400 | 0.91955300  | 0.00000000 |
| H  | 1.00175400  | -0.35517800 | 0.00000000 |
| N  | -5.20455800 | 0.97004800  | 0.00000000 |
| N  | -1.02313100 | 0.72330900  | 0.00000000 |
| N  | 4.51824800  | -0.52152900 | 0.00000000 |

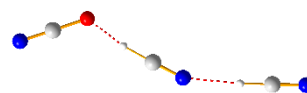

|    |            |            |             |
|----|------------|------------|-------------|
| D8 |            |            |             |
| C  | 0.00000000 | 0.00000000 | -0.22374700 |
| C  | 0.00000000 | 0.00000000 | -4.38264100 |
| C  | 0.00000000 | 0.00000000 | 3.66522400  |
| H  | 0.00000000 | 0.00000000 | -3.28714300 |
| H  | 0.00000000 | 0.00000000 | 0.96144000  |
| N  | 0.00000000 | 0.00000000 | -5.53065800 |
| N  | 0.00000000 | 0.00000000 | -1.37515300 |
| N  | 0.00000000 | 0.00000000 | 2.48046100  |
| O  | 0.00000000 | 0.00000000 | 4.86876700  |

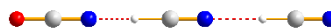

|    |             |             |            |
|----|-------------|-------------|------------|
| D9 |             |             |            |
| C  | 3.25925300  | 0.95575900  | 0.00000000 |
| H  | -3.03304700 | -0.70257800 | 0.00000000 |
| H  | 1.15042400  | 0.19898400  | 0.00000000 |
| C  | -3.98260000 | -1.25420600 | 0.00000000 |
| C  | -1.15383800 | 0.12537700  | 0.00000000 |
| N  | -4.96967600 | -1.84067500 | 0.00000000 |
| N  | 0.00000000  | 0.22513700  | 0.00000000 |
| N  | 4.03407900  | 1.83309900  | 0.00000000 |
| O  | 2.46186300  | 0.00238600  | 0.00000000 |

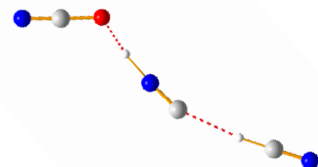

|     |             |             |            |
|-----|-------------|-------------|------------|
| D10 |             |             |            |
| C   | 2.60739900  | -2.35366900 | 0.00000000 |
| H   | -2.34922800 | 2.22754200  | 0.00000000 |
| H   | 0.89794000  | -1.05894400 | 0.00000000 |
| N   | 1.48420700  | -1.97280800 | 0.00000000 |
| O   | 3.69269300  | -2.82772800 | 0.00000000 |
| C   | -3.27964500 | 2.84939100  | 0.00000000 |
| C   | -0.79498400 | 1.06578000  | 0.00000000 |
| N   | -4.23947400 | 3.48231200  | 0.00000000 |
| N   | 0.00000000  | 0.21681100  | 0.00000000 |

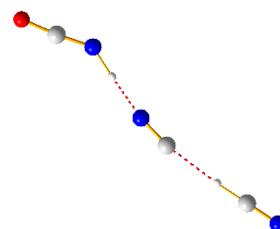

|     |             |             |            |
|-----|-------------|-------------|------------|
| D11 |             |             |            |
| C   | 2.66122200  | -2.15746600 | 0.00000000 |
| H   | -2.23591100 | 1.98537800  | 0.00000000 |
| H   | 0.71619300  | -0.68029900 | 0.00000000 |
| N   | 3.82542100  | -2.31146600 | 0.00000000 |
| O   | 1.43310800  | -2.01052300 | 0.00000000 |
| N   | -3.16174200 | 2.45566400  | 0.00000000 |
| N   | -0.75724400 | 1.08916100  | 0.00000000 |
| C   | -4.20958700 | 2.95585800  | 0.00000000 |
| C   | 0.00000000  | 0.22587200  | 0.00000000 |

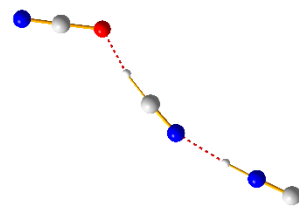

|     |             |             |             |
|-----|-------------|-------------|-------------|
| D12 |             |             |             |
| C   | -3.41045500 | 0.03776500  | 0.00030400  |
| H   | 2.98140300  | 0.02266600  | -0.00029100 |
| H   | -1.38723500 | -0.55634800 | -0.00005300 |
| N   | 4.05646200  | 0.16288000  | 0.00027800  |
| N   | 1.43261100  | -0.18150000 | -0.00093300 |
| C   | 5.20811100  | 0.31247000  | 0.00072000  |
| C   | 0.28313200  | -0.34126600 | -0.00114500 |
| N   | -2.47052600 | -0.69338800 | 0.00095000  |
| O   | -4.40109000 | 0.68299100  | -0.00012400 |

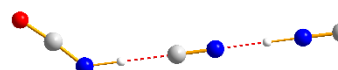

| D13 |             |             |            |
|-----|-------------|-------------|------------|
| C   | -3.25653300 | -0.35704200 | 0.00000000 |
| H   | 2.90725400  | 0.48429200  | 0.00000000 |
| H   | -1.10891600 | -0.25599300 | 0.00000000 |
| N   | 3.95920900  | 0.35960500  | 0.00000000 |
| C   | 5.10588300  | 0.17378000  | 0.00000000 |
| C   | 1.12679200  | 0.51136500  | 0.00000000 |
| N   | 0.00000000  | 0.24824500  | 0.00000000 |
| N   | -4.31468500 | 0.13671000  | 0.00000000 |
| O   | -2.14585800 | -0.92610600 | 0.00000000 |

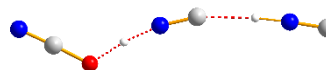

| D14 |             |             |            |
|-----|-------------|-------------|------------|
| C   | -2.71141400 | -2.01271300 | 0.00000000 |
| H   | 2.46960100  | 1.74977400  | 0.00000000 |
| H   | -1.40444500 | -0.36412400 | 0.00000000 |
| N   | 3.44436600  | 2.27478600  | 0.00000000 |
| C   | 4.46748500  | 2.82648000  | 0.00000000 |
| N   | -2.34222600 | -0.88242000 | 0.00000000 |
| O   | -3.17992700 | -3.09740900 | 0.00000000 |
| C   | 1.02047700  | 0.97142000  | 0.00000000 |
| N   | 0.00000000  | 0.41942000  | 0.00000000 |

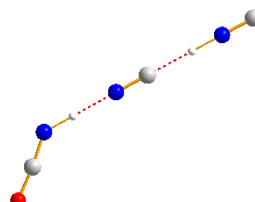

| D15 |             |             |            |
|-----|-------------|-------------|------------|
| C   | 1.23777700  | 3.71870800  | 0.00000000 |
| H   | -0.93585400 | -2.60394700 | 0.00000000 |
| N   | 1.39253000  | 4.85839300  | 0.00000000 |
| O   | -0.81763400 | -0.87402900 | 0.00000000 |
| N   | -1.35343800 | -4.81423400 | 0.00000000 |
| N   | 0.79051900  | 0.90266700  | 0.00000000 |
| C   | -1.13883300 | -3.68594000 | 0.00000000 |
| C   | 0.00000000  | 0.02743300  | 0.00000000 |
| H   | 1.07598700  | 2.60718500  | 0.00000000 |

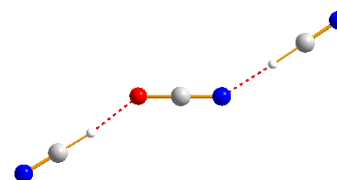

| D16 |             |             |            |
|-----|-------------|-------------|------------|
| C   | -3.58679200 | -0.60202200 | 0.00000000 |
| H   | 2.62896200  | 0.11058700  | 0.00000000 |
| N   | -4.58959800 | -1.16153900 | 0.00000000 |
| C   | 0.00000000  | 0.64828200  | 0.00000000 |
| H   | -2.62748800 | -0.06403700 | 0.00000000 |
| N   | 3.70904700  | -0.08398800 | 0.00000000 |
| C   | 4.85271600  | -0.28617100 | 0.00000000 |
| N   | 1.14520300  | 0.38248000  | 0.00000000 |
| O   | -1.18119800 | 0.92928100  | 0.00000000 |

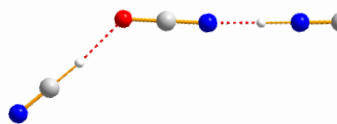

| D17 |             |             |            |
|-----|-------------|-------------|------------|
| C   | 0.82583100  | -3.67826100 | 0.00000000 |
| H   | -0.69667700 | 2.50973600  | 0.00000000 |
| N   | 0.80105100  | -4.82772300 | 0.00000000 |
| O   | -0.82415200 | 0.97364800  | 0.00000000 |
| N   | 0.78262900  | -0.80652100 | 0.00000000 |
| C   | 0.00000000  | 0.07250600  | 0.00000000 |
| H   | 0.83647000  | -2.56052200 | 0.00000000 |
| N   | -0.71943400 | 3.56731900  | 0.00000000 |
| C   | -0.75854700 | 4.72743400  | 0.00000000 |

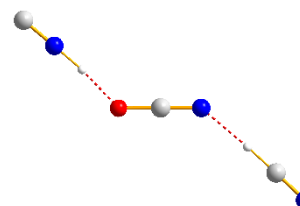

| D18 |             |             |            |
|-----|-------------|-------------|------------|
| H   | -0.39130800 | 2.60139600  | 0.00000000 |
| C   | 0.00000000  | 0.03264900  | 0.00000000 |
| H   | 0.24282100  | -2.58717900 | 0.00000000 |
| N   | -0.24510800 | 3.68159800  | 0.00000000 |
| C   | -0.04963300 | 4.82644700  | 0.00000000 |
| N   | -0.54004700 | 1.07722900  | 0.00000000 |
| O   | 0.56488800  | -1.04308100 | 0.00000000 |
| N   | 0.14899000  | -3.63008200 | 0.00000000 |
| C   | 0.06339000  | -4.78756100 | 0.00000000 |

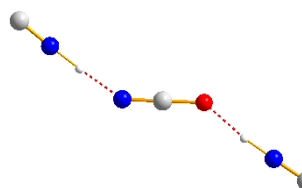

|    |             |             |            |
|----|-------------|-------------|------------|
| T1 |             |             |            |
| C  | 0.27475900  | 1.99793700  | 0.00000000 |
| C  | -0.76334800 | -1.98182500 | 0.00000000 |
| C  | 1.95999600  | 5.01383000  | 0.00000000 |
| O  | 0.78981700  | 4.60908200  | 0.00000000 |
| H  | -0.47075300 | -0.92136900 | 0.00000000 |
| H  | 0.54348100  | 3.12656500  | 0.00000000 |
| N  | 0.00000000  | 0.88201800  | 0.00000000 |
| N  | 3.06791500  | 5.40219900  | 0.00000000 |
| C  | -1.94383400 | -6.07069500 | 0.00000000 |
| N  | -1.07141900 | -3.08582000 | 0.00000000 |
| N  | -2.27097300 | -7.17010400 | 0.00000000 |
| H  | -1.63536100 | -5.03138100 | 0.00000000 |

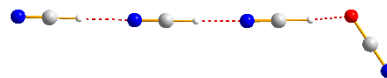

|    |             |             |             |
|----|-------------|-------------|-------------|
| T2 |             |             |             |
| C  | 1.77943100  | -0.43063300 | -0.00002700 |
| C  | -2.19912500 | -0.11306800 | 0.00005300  |
| C  | 5.44228900  | 0.15061500  | 0.00000000  |
| H  | -1.06850600 | -0.19904700 | 0.00001600  |
| H  | 3.45599500  | -0.55605400 | -0.00000900 |
| N  | 0.62186300  | -0.33058500 | -0.00002600 |
| N  | 4.54637400  | -0.63407000 | -0.00001500 |
| O  | 6.39323100  | 0.85300000  | -0.00000100 |
| C  | -6.39366400 | 0.19509700  | -0.00000300 |
| N  | -3.34426800 | -0.02658800 | 0.000008700 |
| N  | -7.53821000 | 0.27725300  | -0.00007500 |
| H  | -5.30723400 | 0.11697000  | 0.00006600  |

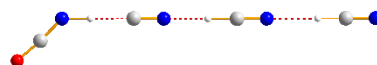

|    |             |             |            |
|----|-------------|-------------|------------|
| T3 |             |             |            |
| C  | 1.97621300  | -4.86934200 | 0.00000000 |
| H  | -0.49033700 | 0.90137700  | 0.00000000 |
| H  | 0.56625700  | -3.27471100 | 0.00000000 |
| C  | -0.78533100 | 1.97713600  | 0.00000000 |
| C  | 0.00000000  | -0.97367200 | 0.00000000 |
| N  | 0.27854300  | -2.09749700 | 0.00000000 |
| N  | 3.08127500  | -5.24661200 | 0.00000000 |
| O  | 0.78401000  | -4.49789200 | 0.00000000 |
| C  | -1.95667900 | 6.05175900  | 0.00000000 |
| N  | -1.09252400 | 3.08239800  | 0.00000000 |
| N  | -2.28212800 | 7.15181400  | 0.00000000 |
| H  | -1.64936400 | 5.01045300  | 0.00000000 |

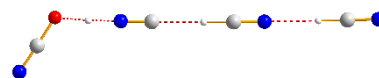

|    |             |             |             |
|----|-------------|-------------|-------------|
| T4 |             |             |             |
| C  | -2.26672600 | -0.10717900 | -0.00184700 |
| C  | 5.43493500  | 0.15792200  | 0.00211400  |
| H  | -1.12332700 | -0.19068900 | -0.00262700 |
| H  | 3.44333300  | -0.52428200 | 0.00156400  |
| N  | 4.51457400  | -0.59512300 | 0.00621600  |
| O  | 6.41341300  | 0.82010400  | -0.00088300 |
| C  | -6.46078700 | 0.18768700  | 0.00155300  |
| N  | -3.41276500 | -0.02426800 | -0.00108000 |
| H  | -7.60559400 | 0.26647600  | 0.00256300  |
| N  | -5.37383700 | 0.11277200  | 0.00060300  |
| C  | 0.68640000  | -0.32731500 | -0.00377600 |
| N  | 1.84429800  | -0.42213100 | -0.00494900 |

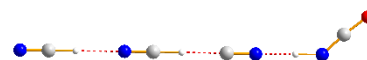

|    |             |             |            |
|----|-------------|-------------|------------|
| T5 |             |             |            |
| C  | 2.09803600  | -4.66802400 | 0.00000000 |
| H  | -0.46561300 | 0.71593100  | 0.00000000 |
| H  | 0.66397100  | -3.26417000 | 0.00000000 |
| C  | 0.00000000  | -0.83586700 | 0.00000000 |
| N  | 0.31723400  | -1.94795700 | 0.00000000 |
| N  | 3.21146900  | -5.00377700 | 0.00000000 |
| O  | 0.87838900  | -4.35751600 | 0.00000000 |
| C  | -2.13531900 | 5.91175900  | 0.00000000 |
| N  | -2.49621600 | 7.00135900  | 0.00000000 |
| H  | -1.79219500 | 4.87316200  | 0.00000000 |
| C  | -1.14526200 | 2.88223900  | 0.00000000 |
| N  | -0.79506000 | 1.77817000  | 0.00000000 |

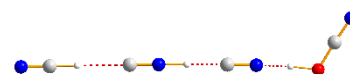

| T6 |             |             |            |
|----|-------------|-------------|------------|
| C  | -1.93488500 | -5.04330700 | 0.00000000 |
| H  | 0.00000000  | 0.62886500  | 0.00000000 |
| H  | -1.86586900 | -3.00418300 | 0.00000000 |
| N  | -2.34449800 | -3.92058800 | 0.00000000 |
| O  | -1.65457000 | -6.18292400 | 0.00000000 |
| C  | 2.67903900  | 5.86508500  | 0.00000000 |
| N  | 3.20090300  | 6.88941000  | 0.00000000 |
| H  | 2.17169900  | 4.86931800  | 0.00000000 |
| C  | -0.52595200 | -0.39004500 | 0.00000000 |
| N  | -1.05376100 | -1.40972600 | 0.00000000 |
| N  | 0.75548900  | 2.09588700  | 0.00000000 |
| C  | 1.28576500  | 3.13235200  | 0.00000000 |

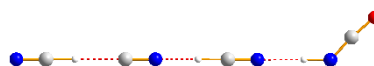

| T7 |             |             |            |
|----|-------------|-------------|------------|
| C  | 2.07118700  | -4.82785500 | 0.00000000 |
| H  | -0.46485500 | 0.78517000  | 0.00000000 |
| H  | 0.60955200  | -3.03761900 | 0.00000000 |
| N  | 3.19028200  | -5.17836700 | 0.00000000 |
| O  | 0.88554400  | -4.46345900 | 0.00000000 |
| C  | -2.10921900 | 5.96783800  | 0.00000000 |
| N  | -2.46690100 | 7.05809000  | 0.00000000 |
| H  | -1.77050000 | 4.93276600  | 0.00000000 |
| C  | -1.11835100 | 2.89925900  | 0.00000000 |
| N  | -0.77421700 | 1.79458400  | 0.00000000 |
| N  | 0.00000000  | -0.79125300 | 0.00000000 |
| C  | 0.30593400  | -1.89824600 | 0.00000000 |

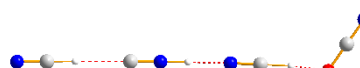

| T8 |             |             |            |
|----|-------------|-------------|------------|
| C  | 3.04303900  | -4.40925700 | 0.00000000 |
| H  | -0.67804600 | 0.65772800  | 0.00000000 |
| H  | 1.37967300  | -3.15266000 | 0.00000000 |
| N  | 1.89310000  | -4.09474500 | 0.00000000 |
| O  | 4.14789400  | -4.82228400 | 0.00000000 |
| C  | -3.29399000 | 5.45037700  | 0.00000000 |
| N  | -3.84588300 | 6.45716600  | 0.00000000 |
| H  | -2.76630200 | 4.48770400  | 0.00000000 |
| N  | -1.22275300 | 1.66128300  | 0.00000000 |
| C  | -1.77649900 | 2.67844100  | 0.00000000 |
| C  | 0.54583000  | -1.62025800 | 0.00000000 |
| N  | 0.00000000  | -0.59660800 | 0.00000000 |

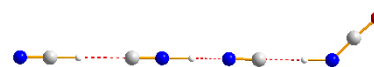

| T9 |             |             |            |
|----|-------------|-------------|------------|
| C  | 2.10449400  | -4.84516300 | 0.00000000 |
| H  | -0.52417500 | 0.95831900  | 0.00000000 |
| H  | 0.62031900  | -3.02861300 | 0.00000000 |
| N  | 3.22797900  | -5.18482600 | 0.00000000 |
| O  | 0.91733900  | -4.49136200 | 0.00000000 |
| H  | -1.75716000 | 4.80876700  | 0.00000000 |
| N  | 0.00000000  | -0.80012700 | 0.00000000 |
| C  | 0.31253800  | -1.90607900 | 0.00000000 |
| C  | -2.44718000 | 6.88602500  | 0.00000000 |
| C  | -0.85449500 | 2.01148600  | 0.00000000 |
| N  | -2.08039500 | 5.78401400  | 0.00000000 |
| N  | -1.20041800 | 3.10305400  | 0.00000000 |

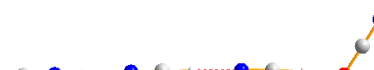

| T10 |             |             |            |
|-----|-------------|-------------|------------|
| C   | 2.93017300  | -4.48560500 | 0.00000000 |
| H   | -0.75275800 | 0.85723800  | 0.00000000 |
| H   | 1.29309900  | -3.16720800 | 0.00000000 |
| N   | 1.79204400  | -4.13378600 | 0.00000000 |
| O   | 4.02532100  | -4.92910700 | 0.00000000 |
| H   | -2.59656000 | 4.44134000  | 0.00000000 |
| C   | 0.51893400  | -1.65719600 | 0.00000000 |
| N   | 0.00000000  | -0.61764000 | 0.00000000 |
| N   | -3.07243300 | 5.36228700  | 0.00000000 |
| C   | -3.60576200 | 6.39374100  | 0.00000000 |
| C   | -1.27483800 | 1.87500700  | 0.00000000 |
| N   | -1.79923800 | 2.89568300  | 0.00000000 |

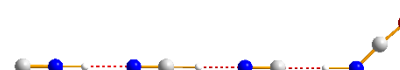

| T11 |             |             |            |
|-----|-------------|-------------|------------|
| C   | 2.23911600  | -4.63260200 | 0.00000000 |
| H   | -0.52089100 | 0.81957100  | 0.00000000 |
| H   | 0.70330100  | -2.93564300 | 0.00000000 |
| N   | 3.37419900  | -4.92499000 | 0.00000000 |
| O   | 1.03529400  | -4.32968100 | 0.00000000 |
| H   | -1.91215200 | 4.67284500  | 0.00000000 |
| N   | 0.00000000  | -0.70798400 | 0.00000000 |
| C   | 0.35131000  | -1.80152700 | 0.00000000 |
| C   | -2.68033000 | 6.73311400  | 0.00000000 |
| N   | -2.27368900 | 5.64485600  | 0.00000000 |
| N   | -0.87490100 | 1.82168200  | 0.00000000 |
| C   | -1.26540800 | 2.90863700  | 0.00000000 |

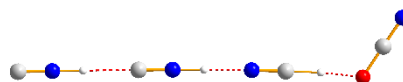

| T12 |             |             |             |
|-----|-------------|-------------|-------------|
| C   | -5.29066600 | 0.14740900  | 0.00020200  |
| H   | 0.77371100  | -0.22322500 | -0.00046800 |
| H   | -3.36727600 | -0.57041200 | 0.00037200  |
| N   | -4.41158800 | -0.66150700 | 0.00054900  |
| O   | -6.23162400 | 0.85176200  | -0.00006900 |
| H   | 5.05298000  | 0.12032700  | -0.00005900 |
| C   | -1.52693400 | -0.41868200 | 0.00000700  |
| N   | -0.37444800 | -0.31883600 | -0.00023000 |
| N   | 6.12584300  | 0.20431200  | 0.00029200  |
| C   | 7.28414900  | 0.29470300  | 0.00079300  |
| N   | 2.17551500  | -0.10806500 | -0.00074700 |
| C   | 3.33117100  | -0.01544700 | -0.00072600 |

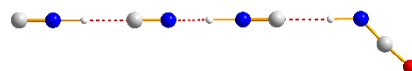

| T13 |             |             |            |
|-----|-------------|-------------|------------|
| C   | 2.10789100  | 4.69878700  | 0.00000000 |
| H   | -0.53897400 | -0.92843900 | 0.00000000 |
| H   | 0.65012300  | 3.20445400  | 0.00000000 |
| N   | 3.22531800  | 5.03273300  | 0.00000000 |
| O   | 0.89817000  | 4.37816000  | 0.00000000 |
| H   | -1.76043700 | -4.78362400 | 0.00000000 |
| C   | -2.44240000 | -6.86693100 | 0.00000000 |
| N   | -2.08050300 | -5.76343200 | 0.00000000 |
| N   | -1.21645300 | -3.09581400 | 0.00000000 |
| C   | -0.87227000 | -2.00240000 | 0.00000000 |
| C   | 0.00000000  | 0.88394600  | 0.00000000 |
| N   | 0.31515300  | 1.99821600  | 0.00000000 |

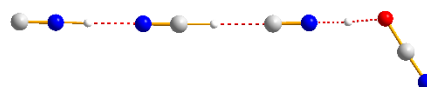

| T14 |             |             |             |
|-----|-------------|-------------|-------------|
| C   | 5.34326500  | -0.15107600 | 0.00011000  |
| H   | -1.17023000 | 0.18538100  | -0.00012600 |
| H   | 3.35821100  | 0.53073800  | 0.00011600  |
| N   | 4.42508400  | 0.60537100  | 0.00019600  |
| O   | 6.32002900  | -0.81453600 | -0.00004500 |
| H   | -5.20370500 | -0.11507100 | 0.00002200  |
| N   | -6.23839500 | -0.19030700 | 0.00006100  |
| C   | -7.39653900 | -0.27411900 | 0.00008000  |
| C   | -2.32796200 | 0.09779100  | -0.00006500 |
| C   | 0.58834700  | 0.32295600  | -0.00018900 |
| N   | -3.47305900 | 0.01201400  | -0.00000300 |
| N   | 1.74534500  | 0.42176900  | -0.00015000 |

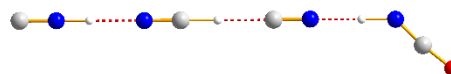

| T15 |             |             |            |
|-----|-------------|-------------|------------|
| C   | 2.26572600  | 4.47324500  | 0.00000000 |
| H   | -0.49665000 | -0.70219400 | 0.00000000 |
| H   | 0.77790600  | 3.16819200  | 0.00000000 |
| N   | 3.39202500  | 4.75732700  | 0.00000000 |
| O   | 1.02882000  | 4.22391600  | 0.00000000 |
| H   | -1.93368200 | -4.58985700 | 0.00000000 |
| C   | -2.72045800 | -6.65682200 | 0.00000000 |
| N   | -2.30668300 | -5.57137500 | 0.00000000 |
| C   | 0.00000000  | 0.72283200  | 0.00000000 |
| N   | 0.36525400  | 1.81861800  | 0.00000000 |
| N   | -0.89197900 | -1.80177800 | 0.00000000 |
| C   | -1.29334400 | -2.88709200 | 0.00000000 |

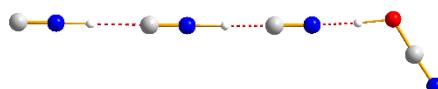

| T16 |             |             |            |
|-----|-------------|-------------|------------|
| C   | 3.12248800  | -4.32615400 | 0.00000000 |
| H   | -0.55722300 | 0.40121300  | 0.00000000 |
| H   | 1.45622900  | -3.15582600 | 0.00000000 |
| N   | 1.95732400  | -4.05773400 | 0.00000000 |
| O   | 4.22987900  | -4.71289600 | 0.00000000 |
| H   | -2.78948100 | 4.32784600  | 0.00000000 |
| N   | -3.33445700 | 5.28223500  | 0.00000000 |
| C   | -3.91106100 | 6.29132700  | 0.00000000 |
| C   | 0.00000000  | -0.58720800 | 0.00000000 |
| N   | 0.56249400  | -1.58742500 | 0.00000000 |
| N   | -1.38962700 | 1.87292600  | 0.00000000 |
| C   | -1.96454400 | 2.88202200  | 0.00000000 |

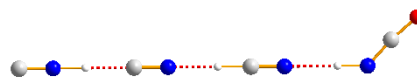

| T17 |             |             |             |
|-----|-------------|-------------|-------------|
| C   | 2.42912300  | 2.30316800  | -0.17429700 |
| C   | -0.46272200 | -0.00027600 | 0.61884300  |
| C   | -4.20797500 | 0.00009500  | -0.27722400 |
| N   | 3.11716700  | 3.20803700  | -0.34027000 |
| N   | -5.26520300 | 0.00031200  | -0.72437600 |
| H   | -3.20072700 | -0.00011200 | 0.15024000  |
| H   | 1.76107900  | -1.43561200 | -0.01159700 |
| H   | 1.76111900  | 1.43580000  | -0.01149000 |
| N   | 0.66692700  | -0.00004700 | 0.26359400  |
| O   | -1.61254300 | -0.00052000 | 0.98833600  |
| N   | 3.11729200  | -3.20775300 | -0.34050200 |
| C   | 2.42917400  | -2.30294700 | -0.17448200 |

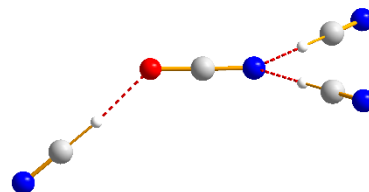

| T18 |            |             |             |
|-----|------------|-------------|-------------|
| C   | 0.00000000 | 2.43579200  | 2.42123900  |
| C   | 0.00000000 | -2.43579200 | 2.42123900  |
| C   | 0.00000000 | 0.00000000  | -0.38385500 |
| C   | 0.00000000 | 0.00000000  | -4.46209400 |
| N   | 0.00000000 | 3.37082700  | 3.08698000  |
| N   | 0.00000000 | -3.37082700 | 3.08698000  |
| N   | 0.00000000 | 0.00000000  | -5.61125700 |
| H   | 0.00000000 | 0.00000000  | -3.35270800 |
| H   | 0.00000000 | 1.54111600  | 1.78945800  |
| H   | 0.00000000 | -1.54111600 | 1.78945800  |
| N   | 0.00000000 | 0.00000000  | -1.55670700 |
| O   | 0.00000000 | 0.00000000  | 0.84408100  |

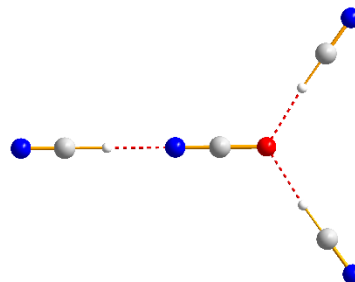

| T19 |             |             |             |
|-----|-------------|-------------|-------------|
| C   | -2.44997900 | -2.19099200 | -0.16060400 |
| C   | 0.41781700  | 0.08707800  | 0.58849000  |
| C   | 4.21249400  | -0.04842000 | -0.25923400 |
| N   | -3.10543000 | -3.12198200 | -0.31007100 |
| N   | 5.28187000  | -0.06519900 | -0.67554000 |
| H   | 3.19615100  | -0.03295100 | 0.13784000  |
| H   | -1.71642600 | 1.40650600  | -0.01115500 |
| H   | -1.81232700 | -1.30555900 | -0.01367700 |
| N   | -2.39535600 | 2.21317500  | -0.18408400 |
| C   | -3.12235700 | 3.10025600  | -0.36662900 |
| N   | -0.71244400 | 0.18672400  | 0.24893300  |
| O   | 1.56303500  | -0.03056800 | 0.94002400  |

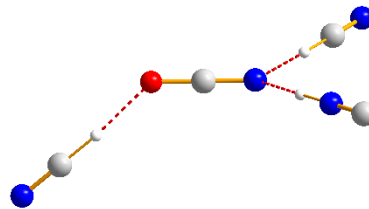

| T20 |             |             |            |
|-----|-------------|-------------|------------|
| C   | -1.67702300 | -2.98220400 | 0.00000000 |
| C   | 0.00000000  | 0.34175500  | 0.00000000 |
| C   | -1.13304600 | 4.27275700  | 0.00000000 |
| N   | -2.43705900 | -3.84204400 | 0.00000000 |
| N   | -1.45391600 | 5.37596400  | 0.00000000 |
| H   | -0.82477200 | 3.21027500  | 0.00000000 |
| H   | 1.86800100  | -1.29333800 | 0.00000000 |
| H   | -0.95210800 | -2.16580300 | 0.00000000 |
| N   | -0.32443900 | 1.46636700  | 0.00000000 |
| O   | 0.33088700  | -0.84460000 | 0.00000000 |
| N   | 2.85217600  | -1.64790100 | 0.00000000 |
| C   | 3.94414500  | -2.04248000 | 0.00000000 |

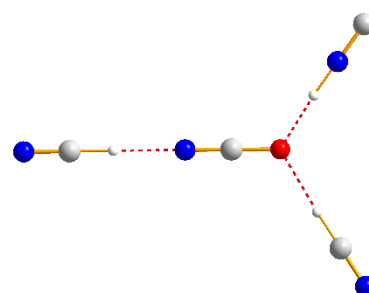



| T21 |            |             |             |
|-----|------------|-------------|-------------|
| C   | 0.00000000 | 0.00000000  | -0.28179900 |
| C   | 0.00000000 | 0.00000000  | -4.38539900 |
| N   | 0.00000000 | 0.00000000  | -5.53411600 |
| H   | 0.00000000 | 0.00000000  | -3.28169900 |
| H   | 0.00000000 | 1.40179200  | 1.78753800  |
| H   | 0.00000000 | -1.40179200 | 1.78753800  |
| N   | 0.00000000 | 2.27123900  | 2.35893000  |
| C   | 0.00000000 | 3.24206500  | 2.99572700  |
| N   | 0.00000000 | -2.27123900 | 2.35893000  |
| C   | 0.00000000 | -3.24206500 | 2.99572700  |
| N   | 0.00000000 | 0.00000000  | -1.45028900 |
| O   | 0.00000000 | 0.00000000  | 0.95336300  |

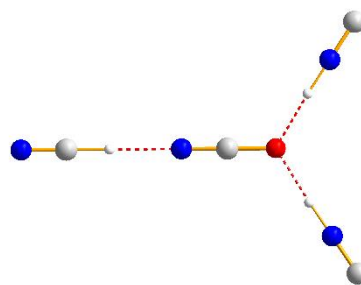

| T22 |             |             |             |
|-----|-------------|-------------|-------------|
| C   | 0.33844600  | -0.00041600 | 0.56367400  |
| C   | 4.18137000  | -0.00106100 | -0.24054600 |
| N   | 5.26013000  | -0.00143000 | -0.63166500 |
| H   | 3.15839100  | -0.00065100 | 0.13212800  |
| H   | -1.76168000 | 1.30951200  | -0.01827200 |
| H   | -1.76350500 | -1.30921700 | -0.01782200 |
| N   | -2.37974200 | 2.15453800  | -0.17379600 |
| C   | -3.04208000 | 3.09415200  | -0.33776400 |
| N   | -0.79957500 | -0.00086000 | 0.22901000  |
| O   | 1.48736100  | 0.00007600  | 0.90878700  |
| N   | -2.38310900 | -2.15320700 | -0.17360900 |
| C   | -3.04707200 | -3.09159900 | -0.33801600 |

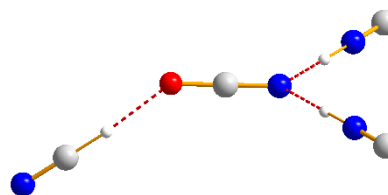

| T23 |            |             |             |
|-----|------------|-------------|-------------|
| C   | 0.00000000 | 0.00000000  | -0.37356100 |
| H   | 0.00000000 | 0.00000000  | -3.15420000 |
| H   | 0.00000000 | 1.40756500  | 1.71878600  |
| H   | 0.00000000 | -1.40756500 | 1.71878600  |
| N   | 0.00000000 | 2.26499400  | 2.30141700  |
| C   | 0.00000000 | 3.22563500  | 2.95355100  |
| N   | 0.00000000 | -2.26499400 | 2.30141700  |
| C   | 0.00000000 | -3.22563500 | 2.95355100  |
| N   | 0.00000000 | 0.00000000  | -1.54071500 |
| O   | 0.00000000 | 0.00000000  | 0.85724600  |
| N   | 0.00000000 | 0.00000000  | -4.21625400 |
| C   | 0.00000000 | 0.00000000  | -5.37727400 |

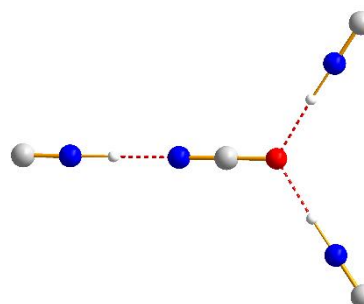

| T24 |             |             |             |
|-----|-------------|-------------|-------------|
| C   | 0.45166100  | 0.00024000  | 0.60789100  |
| H   | 3.01408500  | 0.00076500  | 0.16963200  |
| H   | -1.66683800 | -1.30855100 | -0.01880700 |
| H   | -1.66934800 | 1.30834000  | -0.01849700 |
| N   | -2.29604700 | -2.13797200 | -0.17789100 |
| C   | -2.97688800 | -3.06358600 | -0.34542000 |
| N   | -2.30029500 | 2.13643100  | -0.17769500 |
| C   | -2.98308700 | 3.06059900  | -0.34525700 |
| N   | 3.94384300  | 0.00138200  | -0.28702600 |
| C   | 4.98642800  | 0.00233500  | -0.79762900 |
| N   | -0.67390400 | 0.00085800  | 0.24369100  |
| O   | 1.59227900  | -0.00037200 | 0.99282700  |

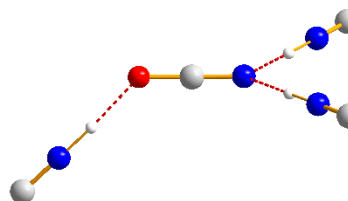

| T25 |             |             |             |
|-----|-------------|-------------|-------------|
| C   | -1.77643600 | 0.56226400  | 0.00041500  |
| C   | 1.82666000  | 0.96880700  | -0.00005500 |
| C   | -5.80642100 | -0.69232200 | -0.00040400 |
| C   | 5.43314900  | -0.87450800 | -0.00027000 |
| N   | -6.90940200 | -1.00831400 | -0.00003000 |
| N   | -2.86226200 | 0.19108800  | 0.00052300  |
| N   | 2.83957300  | 0.37178100  | 0.00039300  |
| N   | 6.47212700  | -1.36661800 | 0.00006400  |
| H   | -4.76156000 | -0.39074200 | -0.00068400 |
| H   | -0.71769700 | 0.92933300  | 0.00024600  |
| H   | 4.42603800  | -0.39500300 | -0.00045400 |
| O   | 0.77640700  | 1.59442600  | -0.00048400 |

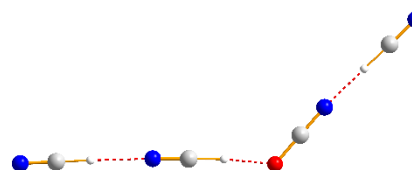

## T26

|   |             |             |             |
|---|-------------|-------------|-------------|
| C | 1.92339600  | 0.16234200  | -0.00000400 |
| C | -1.97795300 | 0.77715100  | -0.00006300 |
| C | 6.08242200  | -0.35839300 | 0.00002700  |
| C | -5.49788100 | -0.60820200 | -0.00001100 |
| N | 7.22174400  | -0.49631300 | -0.00000700 |
| N | 3.06296200  | 0.01369700  | 0.00010100  |
| N | -6.47074600 | -1.21833000 | 0.00002200  |
| H | 4.99942200  | -0.22687200 | 0.00006800  |
| H | 0.78836700  | 0.31354900  | -0.00010400 |
| H | -4.56673300 | -0.02237500 | -0.00000600 |
| O | -3.16543800 | 1.03257900  | 0.00019100  |
| N | -0.82502500 | 0.53489900  | -0.00028400 |

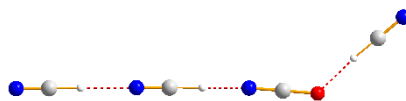

## T27

|   |             |             |             |
|---|-------------|-------------|-------------|
| C | 1.87705300  | -0.19354800 | -0.00211100 |
| C | -1.95157800 | 0.19137100  | -0.00222900 |
| C | 6.07930200  | -0.03193200 | 0.00124200  |
| N | 7.21433000  | 0.13481400  | 0.00468900  |
| N | 3.00990000  | -0.37265600 | -0.00274700 |
| H | 5.00459500  | -0.18737100 | -0.00124300 |
| H | 0.78614900  | -0.00155800 | -0.00077800 |
| H | -4.60190000 | -0.14460200 | 0.00064700  |
| N | -5.69037600 | -0.11204000 | 0.00257200  |
| C | -6.85055100 | -0.05944200 | 0.00465200  |
| N | -3.07075200 | -0.16650000 | -0.00285300 |
| O | -0.79448900 | 0.56369000  | -0.00244700 |

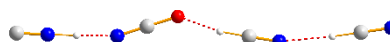

## T28

|   |             |             |             |
|---|-------------|-------------|-------------|
| C | -1.84008300 | 0.17225400  | -0.01733400 |
| C | 2.08108100  | 0.78233600  | -0.00002600 |
| C | -6.00820500 | -0.34117700 | 0.00765900  |
| N | -7.14796300 | -0.47440600 | 0.01644800  |
| N | -2.97908900 | 0.02331000  | -0.01390400 |
| H | -4.92576100 | -0.21395900 | -0.00067000 |
| H | -0.71343900 | 0.32351600  | -0.01990600 |
| H | 4.43853800  | -0.00542600 | 0.01072300  |
| O | 3.27406200  | 1.03253700  | 0.02264600  |
| N | 0.92799400  | 0.55637500  | -0.02173000 |
| N | 5.27042000  | -0.65341400 | 0.00470100  |
| C | 6.18531200  | -1.36799300 | -0.00195300 |

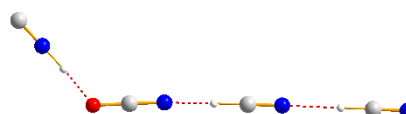

## T29

|   |             |             |             |
|---|-------------|-------------|-------------|
| C | -1.72579300 | 0.99366700  | -0.00013900 |
| C | 5.74293200  | -0.76791700 | -0.00008100 |
| N | 6.83438900  | -1.12309300 | -0.00022100 |
| H | 4.70395500  | -0.42689600 | 0.00008100  |
| H | 0.62249400  | 1.05395800  | 0.00013300  |
| H | -4.31448000 | -0.44303900 | -0.00021600 |
| N | -2.72228500 | 0.37621200  | 0.00005700  |
| O | -0.69210500 | 1.65639200  | -0.00027800 |
| C | -5.30727300 | -0.94006100 | -0.00008700 |
| N | -6.33632600 | -1.45171100 | 0.00006600  |
| N | 1.64143900  | 0.66837000  | 0.00034700  |
| C | 2.72419300  | 0.26037800  | 0.00038600  |

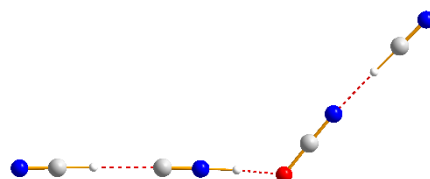

## T30

|   |             |             |             |
|---|-------------|-------------|-------------|
| C | 1.74640500  | 0.45223400  | 0.00948900  |
| C | -6.07571200 | -0.22228100 | -0.13525800 |
| N | -7.21726300 | -0.30155500 | -0.23985100 |
| H | -4.97291000 | -0.14549300 | -0.03393200 |
| H | -0.47467700 | 0.18762000  | 0.38248700  |
| H | 4.58356600  | -0.02191300 | -0.18034300 |
| C | 5.61854300  | -0.34096700 | -0.09217800 |
| N | 6.71153800  | -0.67691900 | 0.00169400  |
| N | -1.84701800 | 0.07957300  | 0.26593400  |
| C | -2.99977400 | -0.00586000 | 0.15088400  |
| N | 0.68060700  | 0.28215800  | 0.47586500  |
| O | 2.85402400  | 0.62477900  | -0.41141500 |

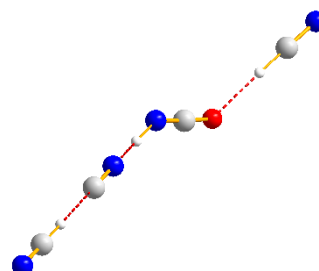

T31

|   |             |             |             |
|---|-------------|-------------|-------------|
| C | -1.82488200 | 0.92844900  | -0.00056200 |
| C | 5.72540200  | -0.69862200 | -0.00018500 |
| N | 6.82583000  | -1.02457100 | -0.00109400 |
| H | 4.67897800  | -0.38562800 | 0.00069100  |
| H | 0.56454500  | 0.99514400  | 0.00029000  |
| H | -4.20575600 | -0.42486200 | -0.00002700 |
| N | 1.58036600  | 0.63696700  | 0.00107400  |
| C | 2.67236900  | 0.25485300  | 0.00197300  |
| N | -5.15727600 | -0.92598900 | 0.00003900  |
| C | -6.18711400 | -1.46236600 | 0.00009900  |
| N | -2.82285400 | 0.31602500  | -0.00023700 |
| O | -0.79186100 | 1.58305600  | -0.00092300 |

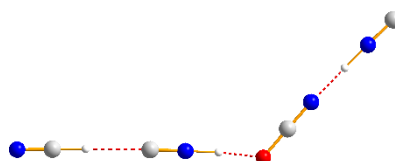

T32

|   |             |             |             |
|---|-------------|-------------|-------------|
| C | -1.95836400 | 0.73082300  | 0.00011100  |
| C | 6.00725400  | -0.32985100 | 0.00102100  |
| N | 7.14899100  | -0.45117800 | 0.00213100  |
| H | 4.91527800  | -0.21311300 | -0.00004100 |
| H | 0.58779900  | 0.30077200  | -0.00247500 |
| H | -4.38710600 | -0.00748500 | 0.00133500  |
| N | 1.71908500  | 0.15475000  | -0.00233000 |
| C | 2.86859100  | 0.01498100  | -0.00194500 |
| N | -0.81076600 | 0.48993100  | -0.00264600 |
| O | -3.14264100 | 0.99247000  | 0.00279800  |
| N | -5.24406100 | -0.60604000 | 0.00067200  |
| C | -6.19541200 | -1.27131600 | -0.00018600 |

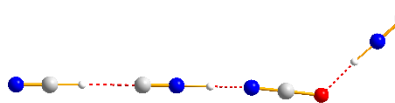

T33

|   |             |             |             |
|---|-------------|-------------|-------------|
| C | 1.77586800  | 0.13839600  | -0.01077000 |
| H | -4.85569400 | -0.14708400 | -0.00007200 |
| H | -0.84899800 | 0.18739900  | -0.01898400 |
| H | 4.58625900  | -0.26653000 | -0.00122300 |
| N | 2.82796600  | -0.38778900 | -0.01779900 |
| O | 0.68647200  | 0.69138600  | -0.00235200 |
| C | 5.69704300  | -0.16119200 | 0.01080600  |
| C | -1.95679300 | 0.01316400  | -0.02083900 |
| C | -7.04793400 | -0.07069700 | 0.02711600  |
| N | -5.88766000 | -0.11609700 | 0.01243000  |
| N | -3.09265000 | -0.14131100 | -0.01795700 |
| N | 6.84056700  | -0.04378900 | 0.02350100  |

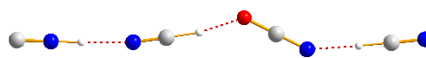

T34

|   |             |             |             |
|---|-------------|-------------|-------------|
| C | -1.87534600 | 0.75216300  | 0.00010600  |
| H | 4.84243200  | -0.22465000 | -0.00001800 |
| H | 0.84634200  | 0.28344200  | -0.00011400 |
| H | -4.49348400 | -0.00612500 | 0.00005900  |
| C | -5.43666400 | -0.56918000 | 0.00001800  |
| C | 1.99413000  | 0.13271800  | -0.00033700 |
| C | 7.02730800  | -0.49042500 | 0.00031300  |
| N | 5.87461200  | -0.35069100 | 0.00018900  |
| N | 3.13326900  | -0.01291500 | -0.00050700 |
| N | -6.42328400 | -1.15656100 | 0.00000800  |
| N | -0.72543300 | 0.49589800  | 0.00010900  |
| O | -3.05825100 | 1.02069500  | 0.00011000  |

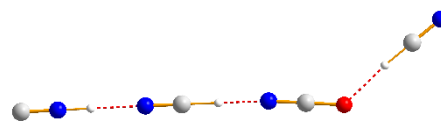

T35

|   |             |             |             |
|---|-------------|-------------|-------------|
| C | 1.82723400  | 0.90553500  | 0.00013000  |
| H | -4.57584700 | -0.35919300 | 0.00001600  |
| H | -0.72975900 | 0.85606700  | -0.00009900 |
| H | 4.23803100  | -0.35409100 | 0.00003300  |
| C | -1.79176200 | 0.50227700  | -0.00022000 |
| C | -6.68655600 | -0.95375800 | 0.00019600  |
| N | -5.56825500 | -0.64076600 | 0.00009500  |
| N | -2.88087400 | 0.14554000  | -0.00035300 |
| N | 5.21154800  | -0.82733700 | -0.00004700 |
| C | 6.25748900  | -1.33181500 | -0.00003700 |
| N | 2.84854100  | 0.32793200  | 0.00015600  |
| O | 0.76905300  | 1.51077700  | 0.00008500  |

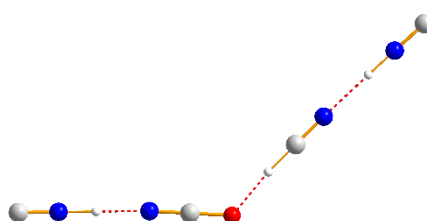

| T36 |             |             |             |
|-----|-------------|-------------|-------------|
| C   | -1.98088200 | 0.76668400  | 0.00005100  |
| H   | 4.76690000  | -0.21442400 | -0.00003900 |
| H   | 0.77229800  | 0.29733200  | 0.00043200  |
| H   | -4.36051300 | 0.01040900  | -0.00021400 |
| C   | 1.90909700  | 0.14499500  | 0.00021900  |
| C   | 6.95039300  | -0.47524600 | -0.00022000 |
| N   | 5.79735700  | -0.33809300 | -0.00012200 |
| N   | 3.04737000  | -0.00273900 | 0.00001500  |
| N   | -0.83068100 | 0.52508300  | 0.00066900  |
| O   | -3.16922700 | 1.03192100  | -0.00048600 |
| N   | -5.20218300 | -0.62076300 | -0.00012700 |
| C   | -6.12992700 | -1.31861500 | 0.00006000  |

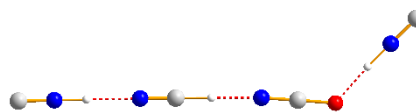

| T37 |             |             |             |
|-----|-------------|-------------|-------------|
| C   | 1.61588300  | 0.99618300  | 0.00041100  |
| H   | -4.51434400 | -0.43594900 | -0.00020800 |
| H   | -0.69199100 | 1.03956800  | -0.00048500 |
| H   | 4.22851100  | -0.41764400 | 0.00164700  |
| C   | -6.59582200 | -1.17025300 | 0.00052500  |
| N   | -5.49956800 | -0.78610300 | 0.00013500  |
| N   | 2.61647400  | 0.38745200  | 0.00129400  |
| O   | 0.57611600  | 1.65300500  | -0.00026400 |
| C   | -2.79070200 | 0.20245400  | -0.00077100 |
| N   | -1.71679500 | 0.62790700  | -0.00074700 |
| N   | 6.26208100  | -1.39765100 | -0.00089800 |
| C   | 5.22623200  | -0.90026000 | 0.00027900  |

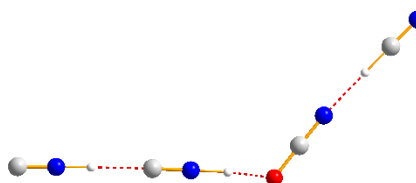

| T38 |             |             |             |
|-----|-------------|-------------|-------------|
| C   | -1.65450600 | 0.52047300  | 0.10271900  |
| H   | 4.77237500  | -0.18704600 | -0.00391300 |
| H   | 0.50100000  | 0.47017600  | -0.33230800 |
| H   | -4.51316500 | -0.14121700 | 0.16537200  |
| C   | 6.98791900  | -0.52263600 | 0.16856200  |
| N   | 5.84240600  | -0.34928200 | 0.07962800  |
| C   | 3.09709100  | 0.06906500  | -0.13668700 |
| N   | 1.95524800  | 0.24790400  | -0.23246600 |
| N   | -6.63418700 | -0.74512900 | -0.17133400 |
| C   | -5.54343900 | -0.43535200 | 0.00211700  |
| N   | -0.59757600 | 0.63900600  | -0.40210900 |
| O   | -2.75548000 | 0.44016300  | 0.55431800  |

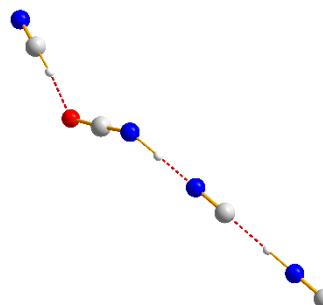

| T39 |             |             |             |
|-----|-------------|-------------|-------------|
| C   | -1.71722200 | 0.93448500  | -0.00011600 |
| H   | 4.49002300  | -0.39505200 | 0.00010700  |
| H   | 0.63572100  | 0.98455300  | 0.00000700  |
| H   | -4.11955300 | -0.40326000 | 0.00015800  |
| C   | 6.58749400  | -1.07372000 | -0.00008900 |
| N   | 5.48144700  | -0.71868000 | -0.00001800 |
| C   | 2.73934400  | 0.20418700  | 0.00008000  |
| N   | 1.65583300  | 0.60401800  | 0.00015000  |
| N   | -5.07300800 | -0.89239200 | 0.00011600  |
| C   | -6.10850900 | -1.41768100 | -0.00000700 |
| O   | -0.67880400 | 1.58393100  | 0.00004200  |
| N   | -2.71890000 | 0.32972300  | -0.00022100 |

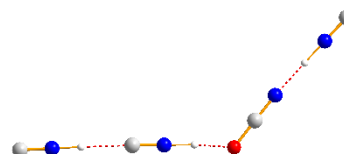

| T40 |             |             |             |
|-----|-------------|-------------|-------------|
| C   | 1.77226800  | -0.59844300 | 0.00568000  |
| H   | -4.68908500 | 0.18289600  | -0.02758600 |
| H   | -0.44563200 | -0.27449600 | 0.33788200  |
| H   | 4.34268300  | 0.01958600  | -0.17188700 |
| C   | -6.90847800 | 0.40638900  | -0.21946800 |
| N   | -5.75666300 | 0.29098100  | -0.12007300 |
| C   | -2.98031500 | 0.00662000  | 0.12239600  |
| N   | -1.83239100 | -0.11522600 | 0.22814600  |
| N   | 0.69218700  | -0.41301100 | 0.42210300  |
| O   | 2.89342700  | -0.79825400 | -0.36994300 |
| N   | 5.26184200  | 0.47384100  | -0.07678900 |
| C   | 6.29815800  | 0.98575800  | 0.03262900  |

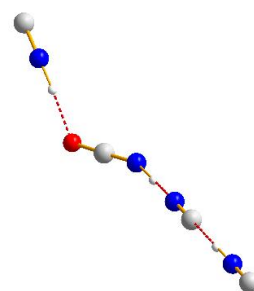

| T41 |             |             |             |
|-----|-------------|-------------|-------------|
| C   | 0.43189900  | 0.06469900  | 0.00270900  |
| H   | 3.19250500  | -0.08844600 | 0.00179100  |
| H   | -1.84203700 | -1.41426000 | -0.00056800 |
| H   | -1.60055100 | 1.53237200  | -0.00054700 |
| N   | -2.17595200 | 2.40047000  | -0.00090100 |
| C   | -2.81868000 | 3.36745000  | -0.00126800 |
| N   | 4.25785900  | -0.14839800 | -0.00084800 |
| C   | 5.41702100  | -0.21477000 | -0.00388900 |
| C   | -2.49920900 | -2.28331900 | -0.00080600 |
| N   | -3.19305700 | -3.19718100 | -0.00104200 |
| N   | 1.59898700  | -0.00248300 | 0.00578700  |
| O   | -0.79387100 | 0.12489000  | -0.00026600 |

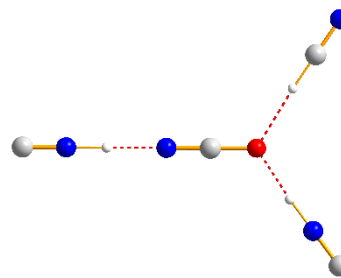

| T42 |             |             |             |
|-----|-------------|-------------|-------------|
| C   | 0.53213700  | 0.10727400  | 0.62715500  |
| H   | 3.05652100  | -0.02343900 | 0.17309600  |
| H   | -1.70401400 | -1.30587000 | -0.01127100 |
| H   | -1.63991000 | 1.40293600  | -0.01450600 |
| N   | -2.33954800 | 2.18199800  | -0.19166200 |
| C   | -3.09641800 | 3.04275200  | -0.37841500 |
| N   | 3.97934100  | -0.04489900 | -0.30631700 |
| C   | 5.00956800  | -0.06895600 | -0.84085600 |
| N   | -0.58749400 | 0.19970500  | 0.26236300  |
| O   | 1.67111300  | -0.00279900 | 1.01435400  |
| C   | -2.34501700 | -2.18539300 | -0.15631500 |
| N   | -3.00703200 | -3.11184600 | -0.30317900 |

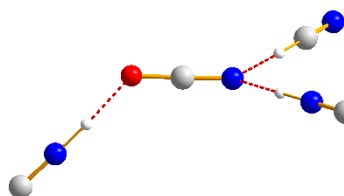

### [SCN(HCN)<sub>n</sub>]<sup>-</sup>

| M1 |             |             |            |
|----|-------------|-------------|------------|
| C  | -0.53890000 | -2.15660000 | 0.00000000 |
| C  | -0.16670000 | 1.59480000  | 0.00000000 |
| H  | 0.00000000  | -1.19430000 | 0.00000000 |
| N  | -1.06760000 | -3.17640000 | 0.00000000 |
| N  | -1.15640000 | 2.21490000  | 0.00000000 |
| S  | 1.23760000  | 0.70600000  | 0.00000000 |

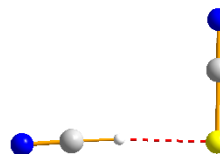

| M2 |             |             |            |
|----|-------------|-------------|------------|
| C  | -0.16046500 | 1.61600000  | 0.00000000 |
| H  | 0.00000000  | -1.20123000 | 0.00000000 |
| N  | -1.04918900 | 2.37147000  | 0.00000000 |
| S  | 1.11859500  | 0.55073100  | 0.00000000 |
| N  | -0.49903800 | -2.12848400 | 0.00000000 |
| C  | -1.01619100 | -3.16789300 | 0.00000000 |

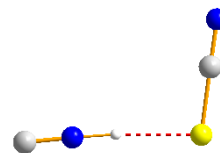

| M3 |            |            |             |
|----|------------|------------|-------------|
| C  | 0.00000000 | 0.00000000 | 1.06058700  |
| N  | 0.00000000 | 0.00000000 | -4.14219900 |
| N  | 0.00000000 | 0.00000000 | -0.11107100 |
| C  | 0.00000000 | 0.00000000 | -2.99248600 |
| S  | 0.00000000 | 0.00000000 | 2.70254600  |
| H  | 0.00000000 | 0.00000000 | -1.87645700 |

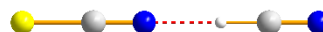

| M4 |            |            |             |
|----|------------|------------|-------------|
| C  | 0.00000000 | 0.00000000 | 0.95471500  |
| N  | 0.00000000 | 0.00000000 | -0.21559200 |
| S  | 0.00000000 | 0.00000000 | 2.59103700  |
| H  | 0.00000000 | 0.00000000 | -1.75403700 |
| N  | 0.00000000 | 0.00000000 | -2.84261100 |
| C  | 0.00000000 | 0.00000000 | -4.00390500 |

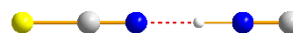

|    |             |             |             |
|----|-------------|-------------|-------------|
| D1 |             |             |             |
| C  | -3.04380000 | 1.31950500  | 0.00009100  |
| C  | 0.07749300  | -0.94146400 | 0.00010700  |
| C  | 3.85935300  | 0.61813700  | -0.00008200 |
| N  | -3.67425400 | 2.27903000  | 0.00006100  |
| N  | 4.93757200  | 1.01507900  | -0.00036700 |
| N  | 1.12586200  | -0.42596500 | 0.00020600  |
| H  | 2.82206200  | 0.23254400  | 0.00017000  |
| H  | -2.46457600 | 0.38822000  | 0.00011400  |
| S  | -1.40250200 | -1.66717700 | -0.00001700 |

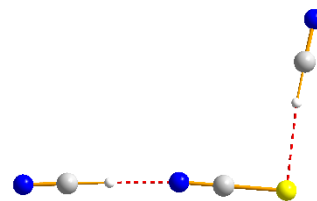

|    |             |             |             |
|----|-------------|-------------|-------------|
| D2 |             |             |             |
| H  | 2.42413500  | 0.34587100  | -0.00002500 |
| C  | 3.06244800  | 1.23522200  | -0.00000900 |
| H  | -2.70814500 | 0.26912900  | -0.00005000 |
| S  | 1.24982700  | -1.66749300 | 0.00002400  |
| C  | -0.20906500 | -0.91083100 | -0.00003200 |
| N  | -1.24565900 | -0.37449500 | -0.00004500 |
| N  | -3.68991300 | 0.68978900  | -0.00002400 |
| C  | -4.75961200 | 1.14126300  | 0.00005900  |
| N  | 3.75330900  | 2.15198600  | 0.00000900  |

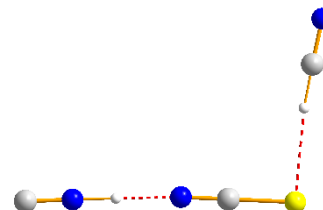

|    |             |             |             |
|----|-------------|-------------|-------------|
| D3 |             |             |             |
| H  | 2.45279600  | 0.32207100  | 0.00006100  |
| H  | -2.75232200 | 0.23258100  | 0.00002100  |
| S  | 1.31768900  | -1.49218200 | -0.00000400 |
| C  | -0.17980700 | -0.80779200 | -0.00000800 |
| N  | -1.24528900 | -0.33494000 | 0.00000900  |
| N  | -3.75291700 | 0.59578900  | 0.00000000  |
| C  | -4.84656100 | 0.98561400  | -0.00000500 |
| N  | 3.07830500  | 1.15235500  | 0.00002000  |
| C  | 3.80233500  | 2.06015000  | -0.00002200 |

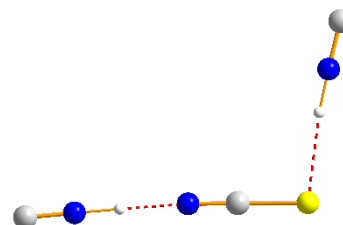

|    |             |             |             |
|----|-------------|-------------|-------------|
| D4 |             |             |             |
| C  | -0.00006400 | 1.46886800  | -0.07025400 |
| H  | 2.05906900  | -0.48287900 | 0.13756100  |
| C  | 3.03711300  | -0.83889400 | -0.20251400 |
| H  | -2.05851600 | -0.48323200 | 0.13714900  |
| C  | -3.03676800 | -0.83903900 | -0.20279000 |
| N  | 0.00028900  | 2.36512500  | -0.81551500 |
| N  | 4.06122000  | -1.23410800 | -0.53847000 |
| N  | -4.06103600 | -1.23400400 | -0.53855000 |
| S  | -0.00034700 | 0.18383800  | 0.98914900  |

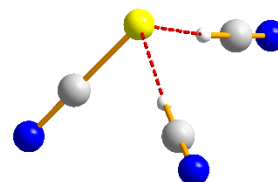

|    |             |             |             |
|----|-------------|-------------|-------------|
| D5 |             |             |             |
| C  | 0.00641100  | 1.59071400  | -0.11694400 |
| H  | 1.93904000  | -0.51354600 | 0.12720600  |
| H  | -1.89337900 | -0.51637700 | 0.15845800  |
| C  | -2.85902300 | -0.93308200 | -0.13951000 |
| N  | -0.11002200 | 2.48323200  | -0.85569600 |
| N  | -3.87067700 | -1.38998200 | -0.43148400 |
| S  | 0.15310500  | 0.31352300  | 0.94527500  |
| N  | 2.81663000  | -0.96037100 | -0.21117500 |
| C  | 3.79480300  | -1.47706500 | -0.56381000 |

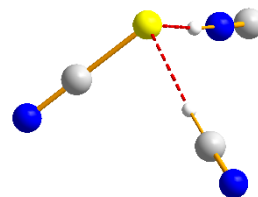

|    |             |             |             |
|----|-------------|-------------|-------------|
| D6 |             |             |             |
| C  | -0.00227100 | 1.68110700  | -0.11745100 |
| H  | -1.80328200 | -0.54814700 | 0.13419900  |
| H  | 1.80520700  | -0.54588600 | 0.13349600  |
| N  | -0.00425500 | 2.61867300  | -0.80607400 |
| S  | 0.00052600  | 0.34409200  | 0.88290700  |
| N  | -2.68096800 | -1.01558000 | -0.16519400 |
| C  | -3.66094100 | -1.55449900 | -0.47726400 |
| C  | 3.66368000  | -1.55089600 | -0.47766700 |
| N  | 2.68334400  | -1.01248000 | -0.16586400 |

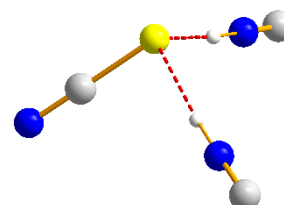

| D7_Cs |             |             |            |
|-------|-------------|-------------|------------|
| C     | -0.00728300 | 1.32639800  | 0.00000000 |
| S     | -0.01744300 | 2.95476400  | 0.00000000 |
| H     | -1.44575200 | -1.01072200 | 0.00000000 |
| C     | -2.29818200 | -1.71005800 | 0.00000000 |
| H     | 1.45782500  | -0.99520300 | 0.00000000 |
| N     | 0.00000000  | 0.14893900  | 0.00000000 |
| N     | -3.18597900 | -2.43868400 | 0.00000000 |
| C     | 2.31781600  | -1.68523500 | 0.00000000 |
| N     | 3.21353800  | -2.40410200 | 0.00000000 |

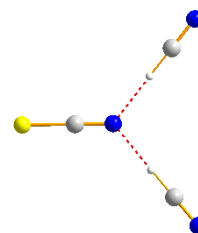

| D7_C2v |            |             |             |
|--------|------------|-------------|-------------|
| C      | 0.00000000 | 0.00000000  | 1.33267200  |
| S      | 0.00000000 | 0.00000000  | 2.96116900  |
| H      | 0.00000000 | 1.44723100  | -1.00415200 |
| C      | 0.00000000 | 2.29991900  | -1.70260800 |
| H      | 0.00000000 | -1.44723100 | -1.00415200 |
| C      | 0.00000000 | -2.29991900 | -1.70260800 |
| N      | 0.00000000 | 0.00000000  | 0.15527300  |
| N      | 0.00000000 | 3.18858200  | -2.43014600 |
| N      | 0.00000000 | -3.18858200 | -2.43014600 |

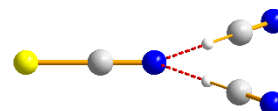

| D8 |             |             |            |
|----|-------------|-------------|------------|
| C  | -1.15260100 | -0.62327900 | 0.00000000 |
| S  | -2.74736600 | -0.93022800 | 0.00000000 |
| H  | 0.39948100  | 1.49934100  | 0.00000000 |
| C  | 0.63959100  | 2.56793100  | 0.00000000 |
| H  | 1.50461900  | -0.98572600 | 0.00000000 |
| N  | 0.00000000  | -0.38410500 | 0.00000000 |
| N  | 0.89122800  | 3.68793200  | 0.00000000 |
| N  | 2.49424600  | -1.37192700 | 0.00000000 |
| C  | 3.57224800  | -1.80353000 | 0.00000000 |

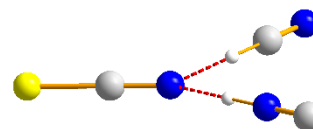

| D9_Cs |             |             |            |
|-------|-------------|-------------|------------|
| C     | -0.03885900 | -1.25172400 | 0.00000000 |
| S     | -0.09229300 | -2.86925600 | 0.00000000 |
| H     | 1.32316500  | 0.95063900  | 0.00000000 |
| H     | -1.25855500 | 1.03011700  | 0.00000000 |
| N     | 0.00000000  | -0.07285800 | 0.00000000 |
| N     | -2.04737900 | 1.72530400  | 0.00000000 |
| C     | -2.92651900 | 2.48366500  | 0.00000000 |
| C     | 3.07728100  | 2.29913700  | 0.00000000 |
| N     | 2.15318600  | 1.59625000  | 0.00000000 |

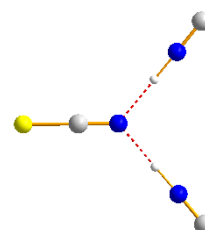

| D9_C2v |            |             |             |
|--------|------------|-------------|-------------|
| C      | 0.00000000 | 0.00000000  | 1.25503900  |
| S      | 0.00000000 | 0.00000000  | 2.87353800  |
| H      | 0.00000000 | 1.28962200  | -0.99161700 |
| H      | 0.00000000 | -1.28962200 | -0.99161700 |
| N      | 0.00000000 | 0.00000000  | 0.07558400  |
| N      | 0.00000000 | -2.09767200 | -1.66410100 |
| C      | 0.00000000 | -2.99874200 | -2.39627300 |
| C      | 0.00000000 | 2.99874200  | -2.39627300 |
| N      | 0.00000000 | 2.09767200  | -1.66410100 |

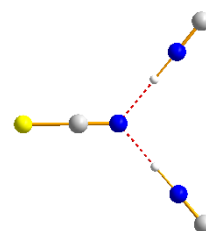

| D10 |             |             |             |
|-----|-------------|-------------|-------------|
| H   | -2.51843300 | 0.34663300  | -0.00006200 |
| H   | 2.88456600  | 0.21217100  | -0.00000500 |
| S   | -1.44083500 | -1.48344300 | 0.00001600  |
| C   | 0.07410100  | -0.82637200 | 0.00004700  |
| N   | 1.14916200  | -0.37300300 | 0.00002600  |
| N   | -3.11607200 | 1.20115300  | -0.00003300 |
| C   | -3.80736600 | 2.13404500  | 0.00000000  |
| C   | 3.93728000  | 0.54755400  | -0.00002200 |
| N   | 5.03307200  | 0.89255200  | -0.00004100 |

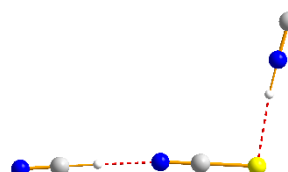

| D11 |             |             |             |
|-----|-------------|-------------|-------------|
| C   | 2.96736500  | 0.69312500  | -0.00098000 |
| H   | -3.52480200 | 0.02582800  | 0.00171200  |
| C   | -4.60957300 | 0.11307500  | -0.00120900 |
| N   | -5.75364800 | 0.20065600  | -0.00419200 |
| N   | -1.55744000 | -0.18786900 | 0.00672800  |
| N   | 3.05582000  | 1.85711100  | -0.00017300 |
| S   | 2.81301200  | -0.96215800 | -0.00205200 |
| C   | -0.41999000 | -0.33769400 | 0.00427400  |
| H   | 0.67667800  | -0.53163200 | 0.00205200  |

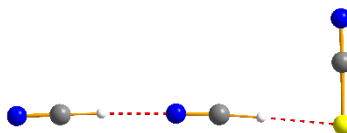

| D12 |             |             |             |
|-----|-------------|-------------|-------------|
| C   | 2.90805600  | -0.00010700 | -0.00000400 |
| H   | -4.16724300 | -0.00010300 | 0.00001200  |
| C   | -5.25766000 | 0.00032300  | 0.00000400  |
| N   | -6.40525600 | 0.00076900  | 0.00000500  |
| N   | -2.21056100 | -0.00078000 | 0.00000500  |
| C   | -1.06173100 | -0.00073800 | -0.00005600 |
| H   | 0.07640700  | -0.00067700 | -0.00004800 |
| N   | 1.73589400  | -0.00057200 | 0.00005900  |
| S   | 4.54489400  | 0.00050000  | -0.00000700 |

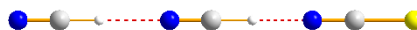

| D13 |             |             |             |
|-----|-------------|-------------|-------------|
| C   | 3.10184500  | 0.63580000  | -0.00086800 |
| H   | -3.63118900 | 0.07027300  | 0.00163800  |
| C   | -4.71949000 | 0.17448600  | -0.00105100 |
| N   | -5.86241100 | 0.27994300  | -0.00343200 |
| H   | 0.65465300  | -0.51388000 | 0.00189300  |
| C   | -1.54773900 | -0.17307100 | 0.00613800  |
| N   | -0.40146900 | -0.32990500 | 0.00374700  |
| N   | 3.46136100  | 1.74444900  | -0.00017400 |
| S   | 2.59915500  | -0.95256800 | -0.00186500 |

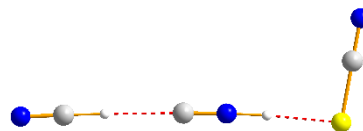

| D14 |             |             |             |
|-----|-------------|-------------|-------------|
| C   | -2.79540800 | 0.00256200  | 0.00013400  |
| H   | 4.13379900  | 0.00344700  | 0.00003100  |
| C   | 5.23303100  | -0.00810300 | 0.00007500  |
| N   | 6.38121700  | -0.02042500 | 0.00011700  |
| H   | -0.22689200 | 0.01917600  | -0.00025700 |
| N   | -1.62525000 | 0.01484100  | 0.00089600  |
| S   | -4.42399800 | -0.01381000 | -0.00017800 |
| C   | 2.08204600  | 0.02030100  | -0.00044400 |
| N   | 0.92389800  | 0.02126700  | -0.00037200 |

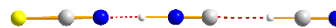

| D15 |             |             |             |
|-----|-------------|-------------|-------------|
| C   | -3.00075300 | 0.62439200  | 0.00005300  |
| H   | 3.45644300  | 0.07241000  | -0.00111600 |
| H   | -0.58034800 | -0.51032100 | 0.00021900  |
| C   | 1.62596700  | -0.14963100 | -0.00036100 |
| N   | 0.48250300  | -0.31165400 | 0.00015600  |
| N   | -3.36685700 | 1.73044900  | 0.00000700  |
| S   | -2.48813500 | -0.96142200 | 0.00006200  |
| C   | 5.65111500  | 0.29540600  | 0.00113400  |
| N   | 4.49522400  | 0.18115700  | -0.00088600 |

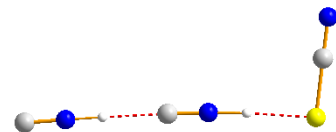

| D16 |             |             |             |
|-----|-------------|-------------|-------------|
| C   | -2.68556900 | -0.04466300 | 0.00051700  |
| H   | 3.89390900  | -0.01598400 | -0.00108600 |
| H   | -0.39432800 | -0.22417100 | 0.00021600  |
| C   | 2.18939200  | -0.16750500 | -0.00140000 |
| N   | 1.03165400  | -0.22735100 | -0.00064000 |
| C   | 6.12415100  | 0.22551400  | 0.00102200  |
| N   | 4.96956800  | 0.09596500  | -0.00026000 |
| N   | -1.52874300 | -0.20210000 | 0.00177700  |
| S   | -4.28592400 | 0.15590500  | -0.00038100 |

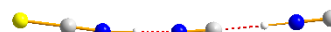



## D17

|   |             |             |             |
|---|-------------|-------------|-------------|
| C | 2.86853200  | 0.68500500  | 0.00007000  |
| H | -3.36981400 | 0.02523800  | 0.00063600  |
| H | 0.60667700  | -0.52829400 | 0.00056500  |
| C | -5.55785500 | 0.20697800  | -0.00069000 |
| N | -4.40047900 | 0.11392300  | 0.00010800  |
| N | -1.62773300 | -0.16337800 | 0.00049800  |
| C | -0.49230000 | -0.32018600 | 0.00044700  |
| N | 2.95755600  | 1.84869100  | -0.00010500 |
| S | 2.70921600  | -0.97014800 | -0.00022900 |

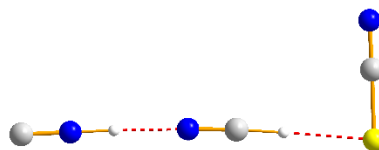

## D18

|   |             |             |             |
|---|-------------|-------------|-------------|
| C | -2.80698700 | 0.00593900  | -0.00039400 |
| H | 4.00924700  | 0.00122300  | 0.00036700  |
| H | -0.01549200 | 0.02244700  | -0.00010300 |
| C | 6.20902000  | -0.02255200 | -0.00058500 |
| N | 5.04796000  | -0.00966500 | -0.00002700 |
| N | -1.63479700 | 0.02191900  | -0.00120200 |
| S | -4.44174600 | -0.01572100 | 0.00025600  |
| N | 2.28135500  | 0.01701400  | 0.00095000  |
| C | 1.13339400  | 0.02044500  | 0.00057700  |

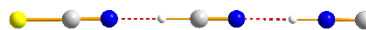

## T1

|   |             |             |             |
|---|-------------|-------------|-------------|
| C | 0.03566943  | 1.40503191  | -0.65978334 |
| H | 2.95676563  | 0.13657894  | 1.37090395  |
| C | 3.51486454  | -0.35017123 | 2.15015032  |
| N | 4.11013542  | -0.86934121 | 2.98129811  |
| S | 1.65341001  | 1.27331036  | -0.44890814 |
| H | -2.06094039 | 2.96167741  | -0.06327280 |
| C | -2.59002715 | 3.78963394  | 0.36034872  |
| H | -2.05302969 | 0.19937143  | -1.79546950 |
| C | -2.58152454 | -0.54247146 | -2.35695175 |
| N | -1.12668195 | 1.49967643  | -0.81130131 |
| N | -3.14785369 | -1.33742198 | -2.95862983 |
| N | -3.15699060 | 4.67686286  | 0.81429678  |

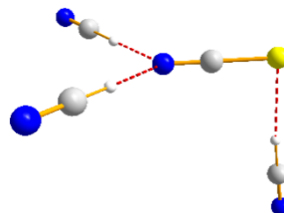

## T2

|   |             |             |             |
|---|-------------|-------------|-------------|
| C | -0.00009395 | 1.39282337  | -0.00702091 |
| H | 2.05906900  | -0.48287900 | 0.13756100  |
| C | 3.03711300  | -0.83889400 | -0.20251400 |
| H | -2.05851600 | -0.48323200 | 0.13714900  |
| C | -3.03676800 | -0.83903900 | -0.20279000 |
| N | 4.06122000  | -1.23410800 | -0.53847000 |
| N | -4.06103600 | -1.23400400 | -0.53855000 |
| S | -0.00037695 | 0.10779337  | 1.05238209  |
| C | 0.00125769  | 4.82459681  | -2.86062976 |
| N | 0.00160505  | 5.70652998  | -3.59398013 |
| N | 0.00025341  | 2.27475654  | -0.74037128 |
| H | 0.00089392  | 3.90098903  | -2.09262587 |

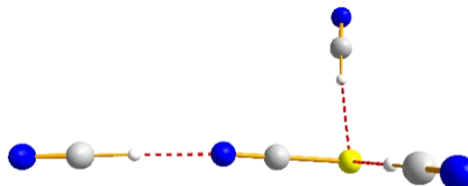

## T3

|   |             |             |             |
|---|-------------|-------------|-------------|
| C | -0.01705442 | 1.46919926  | -0.12476662 |
| H | 2.05906900  | -0.48287900 | 0.13756100  |
| C | 3.03711300  | -0.83889400 | -0.20251400 |
| H | -2.05851600 | -0.48323200 | 0.13714900  |
| C | -3.03676800 | -0.83903900 | -0.20279000 |
| N | -0.01670142 | 2.36545626  | -0.87002762 |
| N | 4.06122000  | -1.23410800 | -0.53847000 |
| N | -4.06103600 | -1.23400400 | -0.53855000 |
| S | -0.01733742 | 0.18416926  | 0.93463638  |
| C | 0.99982621  | 0.16433756  | 4.19813809  |
| N | 1.34112234  | 0.15768329  | 5.29316397  |
| H | 0.67549075  | 0.17066115  | 3.15752936  |

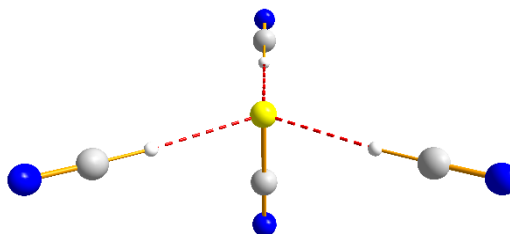

|    |             |             |             |
|----|-------------|-------------|-------------|
| T4 |             |             |             |
| H  | -3.71285117 | 0.04022350  | 0.00122169  |
| C  | -4.79762217 | 0.12747050  | -0.00169931 |
| N  | -1.55744000 | -0.18786900 | 0.00672800  |
| S  | 2.80362731  | -1.08565190 | -0.00213762 |
| C  | -0.41999000 | -0.33769400 | 0.00427400  |
| H  | 0.67667800  | -0.53163200 | 0.00205200  |
| N  | -5.94127219 | 0.21501897  | -0.00468120 |
| C  | 3.29995902  | 5.06975470  | 0.00205435  |
| N  | 3.38687258  | 6.21345677  | 0.00284729  |
| N  | 3.04489386  | 1.71333316  | -0.00027268 |
| C  | 2.95798031  | 0.56963110  | -0.00106562 |
| H  | 3.20893847  | 3.87200848  | 0.00122394  |

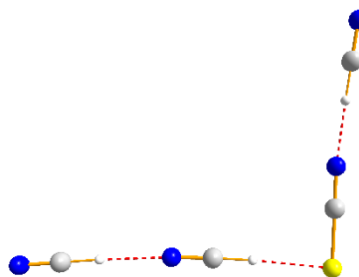

|    |             |             |             |
|----|-------------|-------------|-------------|
| T5 |             |             |             |
| N  | -1.55744000 | -0.18786900 | 0.00672800  |
| S  | 2.79855798  | -1.15235954 | -0.00218387 |
| C  | -0.41999000 | -0.33769400 | 0.00427400  |
| H  | 0.67667800  | -0.53163200 | 0.00205200  |
| C  | 3.29488969  | 5.00304706  | 0.00200810  |
| N  | 3.03982453  | 1.64662552  | -0.00031893 |
| C  | 2.95291098  | 0.50292346  | -0.00111187 |
| H  | 3.20386914  | 3.80530084  | 0.00117769  |
| C  | 3.62943491  | 9.40535272  | 0.00506026  |
| N  | 3.38180325  | 6.14674912  | 0.00280104  |
| N  | 3.71631816  | 10.54865593 | 0.00585293  |
| H  | 3.54531744  | 8.29844456  | 0.00429283  |

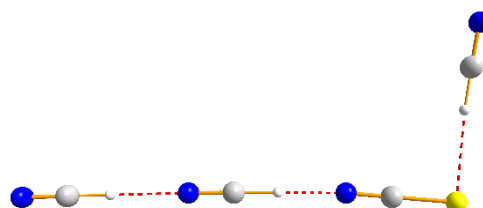

|    |             |             |             |
|----|-------------|-------------|-------------|
| T6 |             |             |             |
| C  | -0.00006400 | 1.46886800  | -0.07025400 |
| H  | 1.94563904  | -0.43910515 | 0.17477144  |
| C  | 2.92368304  | -0.79512015 | -0.16530356 |
| H  | -2.05851600 | -0.48323200 | 0.13714900  |
| C  | -3.03676800 | -0.83903900 | -0.20279000 |
| N  | 0.00028900  | 2.36512500  | -0.81551500 |
| N  | -4.06103600 | -1.23400400 | -0.53855000 |
| S  | -0.00034700 | 0.18383800  | 0.98914900  |
| C  | 6.95568762  | -2.35111445 | -1.48799360 |
| N  | 3.99526830  | -1.20865652 | -0.51683469 |
| N  | 7.97892129  | -2.74599142 | -1.82366311 |
| H  | 5.94271304  | -1.96019657 | -1.15568956 |

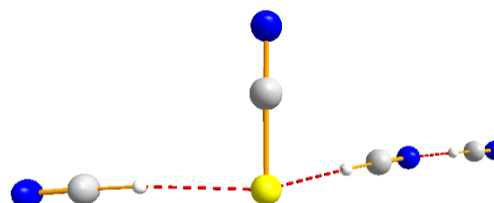

|    |             |             |             |
|----|-------------|-------------|-------------|
| T7 |             |             |             |
| C  | 0.00000000  | 0.00000000  | 1.33267200  |
| S  | 0.00000000  | 0.00000000  | 2.96116900  |
| H  | 0.00000000  | 1.33693077  | -0.91385049 |
| C  | 0.00000000  | 2.18961877  | -1.61230649 |
| H  | 0.00000000  | -1.44723100 | -1.00415200 |
| C  | 0.00000000  | -2.29991900 | -1.70260800 |
| N  | 0.00000000  | 0.00000000  | 0.15527300  |
| N  | 0.00000000  | -3.18858200 | -2.43014600 |
| C  | 0.00000000  | 5.71063729  | -4.49492316 |
| N  | 0.00000000  | 6.59814597  | -5.22151613 |
| H  | -0.00000000 | 4.78119054  | -3.73399598 |
| N  | 0.00000000  | 3.11906552  | -2.37323367 |

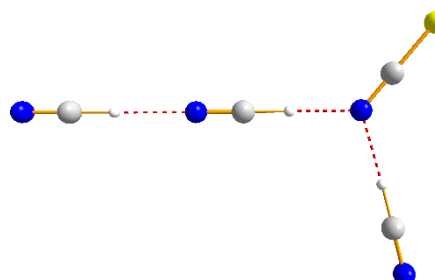

|    |              |             |             |
|----|--------------|-------------|-------------|
| T8 |              |             |             |
| C  | 2.90805600   | -0.00010700 | -0.00000400 |
| H  | -4.35514299  | -0.00002997 | 0.00001216  |
| C  | -5.44555999  | 0.00039603  | 0.00000416  |
| N  | -2.21056100  | -0.00078000 | 0.00000500  |
| C  | -1.06173100  | -0.00073800 | -0.00005600 |
| H  | 0.07640700   | -0.00067700 | -0.00004800 |
| N  | 1.73589400   | -0.00057200 | 0.00005900  |
| S  | 4.54489400   | 0.00050000  | -0.00000700 |
| C  | -9.33375969  | 0.00190713  | 0.00000755  |
| N  | -10.48215961 | 0.00235344  | 0.00000855  |
| H  | -8.13255978  | 0.00144030  | 0.00000651  |
| N  | -6.59255990  | 0.00084179  | 0.00000516  |

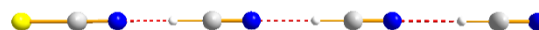

|    |             |             |             |
|----|-------------|-------------|-------------|
| T9 |             |             |             |
| C  | 2.96736500  | 0.69312500  | -0.00098000 |
| H  | -3.71285117 | 0.04022350  | 0.00122169  |
| C  | -4.79762217 | 0.12747050  | -0.00169931 |
| N  | -1.55744000 | -0.18786900 | 0.00672800  |
| N  | 3.05582000  | 1.85711100  | -0.00017300 |
| S  | 2.81301200  | -0.96215800 | -0.00205200 |
| C  | -0.41999000 | -0.33769400 | 0.00427400  |
| H  | 0.67667800  | -0.53163200 | 0.00205200  |
| C  | -8.67446612 | 0.42424988  | -0.01180759 |
| N  | -9.81811615 | 0.51179835  | -0.01478948 |
| H  | -7.47677440 | 0.33256443  | -0.00868479 |
| N  | -5.94127219 | 0.21501897  | -0.00468120 |

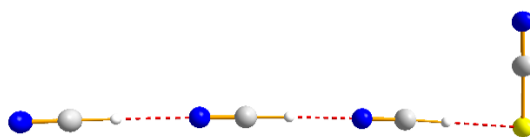

### [P(CN)<sub>2</sub>(HCN)<sub>2</sub>]<sup>-</sup>

|   |            |             |             |
|---|------------|-------------|-------------|
| 1 |            |             |             |
| P | 0.00000000 | 0.00000000  | 2.11142300  |
| C | 0.00000000 | 1.29913100  | 0.92070000  |
| C | 0.00000000 | -1.29913100 | 0.92070000  |
| N | 0.00000000 | 2.23920100  | 0.23869300  |
| N | 0.00000000 | -2.23920100 | 0.23869300  |
| H | 0.00000000 | -3.82123700 | -0.80679400 |
| C | 0.00000000 | -4.75237600 | -1.38553000 |
| H | 0.00000000 | 3.82123700  | -0.80679400 |
| C | 0.00000000 | 4.75237600  | -1.38553000 |
| N | 0.00000000 | -5.73014300 | -1.98725000 |
| N | 0.00000000 | 5.73014300  | -1.98725000 |

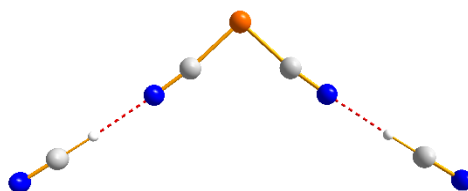

|   |             |             |            |
|---|-------------|-------------|------------|
| 2 |             |             |            |
| P | -0.84473500 | -3.69482000 | 0.00000000 |
| C | -0.41036200 | -1.99114600 | 0.00000000 |
| C | -2.59183600 | -3.41811900 | 0.00000000 |
| N | 0.00000000  | -0.90290000 | 0.00000000 |
| N | -3.75216400 | -3.36772500 | 0.00000000 |
| H | 0.62432800  | 0.76045700  | 0.00000000 |
| C | 1.03368200  | 1.79494300  | 0.00000000 |
| N | 1.46123200  | 2.85941300  | 0.00000000 |
| H | 2.22852000  | 4.70342800  | 0.00000000 |
| C | 2.65456200  | 5.70294600  | 0.00000000 |
| N | 3.10549000  | 6.75788000  | 0.00000000 |

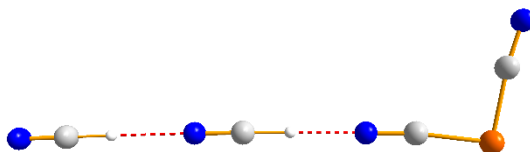

|   |             |             |            |
|---|-------------|-------------|------------|
| 3 |             |             |            |
| P | -1.68322800 | 1.20320500  | 0.00000000 |
| H | 2.99906000  | 2.73704700  | 0.00000000 |
| C | 4.01040700  | 3.16601800  | 0.00000000 |
| H | -1.61900700 | -3.72353000 | 0.00000000 |
| C | -1.69716200 | -4.81931200 | 0.00000000 |
| N | 5.06560700  | 3.61881400  | 0.00000000 |
| N | -1.78372100 | -5.96429200 | 0.00000000 |
| N | 0.00000000  | 1.57651400  | 0.00000000 |
| C | 1.09750800  | 1.98208000  | 0.00000000 |
| C | -1.52079500 | -1.67995200 | 0.00000000 |
| N | -1.49208300 | -0.51026500 | 0.00000000 |

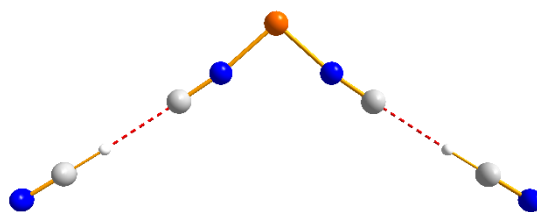

|   |             |             |            |
|---|-------------|-------------|------------|
| 4 |             |             |            |
| P | -1.69461600 | 1.19610100  | 0.00000000 |
| C | -1.51274500 | -0.55329900 | 0.00000000 |
| N | -1.51713900 | -1.71667700 | 0.00000000 |
| H | 2.99515800  | 2.74350300  | 0.00000000 |
| C | 4.00015100  | 3.18468000  | 0.00000000 |
| H | -1.59414500 | -3.60369600 | 0.00000000 |
| C | -1.66461500 | -4.69866700 | 0.00000000 |
| N | 5.04930500  | 3.65109000  | 0.00000000 |
| N | -1.74274900 | -5.84421200 | 0.00000000 |
| N | 0.00000000  | 1.55502100  | 0.00000000 |
| C | 1.09259200  | 1.96764100  | 0.00000000 |

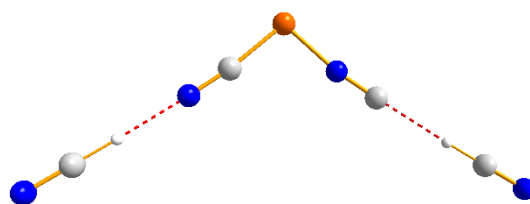

|   |             |             |             |
|---|-------------|-------------|-------------|
| 5 |             |             |             |
| P | 0.00000300  | 0.46933700  | 0.00000000  |
| C | 0.00000300  | -0.70983200 | 1.32155400  |
| C | 0.00000300  | -0.70983200 | -1.32155400 |
| N | 0.00000300  | -1.37920200 | 2.26894900  |
| N | 0.00000300  | -1.37920200 | -2.26894900 |
| H | 2.51903900  | 0.56702500  | 0.00000000  |
| C | 3.60332000  | 0.67900600  | 0.00000000  |
| H | -2.51905200 | 0.56693800  | 0.00000000  |
| C | -3.60333000 | 0.67893000  | 0.00000000  |
| N | 4.74181400  | 0.82182200  | 0.00000000  |
| N | -4.74182100 | 0.82177500  | 0.00000000  |

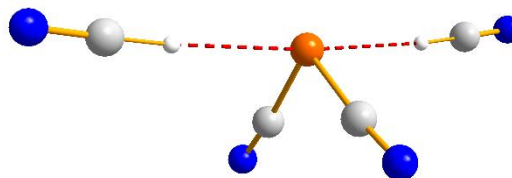

## Starting compounds

|                |            |            |             |
|----------------|------------|------------|-------------|
| $\text{N}_3^-$ |            |            |             |
| N              | 0.00000000 | 0.00000000 | 0.00000000  |
| N              | 0.00000000 | 0.00000000 | 1.17426300  |
| N              | 0.00000000 | 0.00000000 | -1.17426300 |

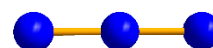

|                |            |            |             |
|----------------|------------|------------|-------------|
| $\text{OCN}^-$ |            |            |             |
| C              | 0.00000000 | 0.00000000 | -0.06980000 |
| O              | 0.00000000 | 0.00000000 | 1.15140000  |
| N              | 0.00000000 | 0.00000000 | -1.25610000 |

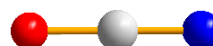

|                |            |            |             |
|----------------|------------|------------|-------------|
| $\text{SCN}^-$ |            |            |             |
| C              | 0.00000000 | 0.00000000 | -0.63192800 |
| S              | 0.00000000 | 0.00000000 | 1.02573900  |
| N              | 0.00000000 | 0.00000000 | -1.80289300 |

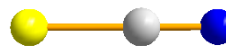

|                |            |            |             |
|----------------|------------|------------|-------------|
| $\text{OCP}^-$ |            |            |             |
| C              | 0.00000000 | 0.00000000 | -0.50970500 |
| O              | 0.00000000 | 0.00000000 | -1.70270100 |
| P              | 0.00000000 | 0.00000000 | 1.11198900  |

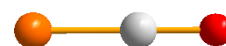

|                             |            |             |             |
|-----------------------------|------------|-------------|-------------|
| $[\text{P}(\text{CN})_2]^-$ |            |             |             |
| P                           | 0.00000000 | 0.00000000  | 0.97654000  |
| C                           | 0.00000000 | -1.31760800 | -0.20261800 |
| C                           | 0.00000000 | 1.31760800  | -0.20261800 |
| N                           | 0.00000000 | -2.26841200 | -0.87262100 |
| N                           | 0.00000000 | 2.26841200  | -0.87262100 |

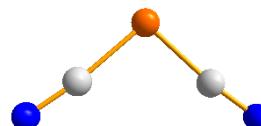

|                       |             |             |            |
|-----------------------|-------------|-------------|------------|
| $\text{CH}_2\text{O}$ |             |             |            |
| C                     | -0.00000500 | 0.52515500  | 0.00000000 |
| H                     | 0.94012200  | 1.11061500  | 0.00000000 |
| H                     | -0.94004500 | 1.11077200  | 0.00000000 |
| O                     | -0.00000500 | -0.67154000 | 0.00000000 |

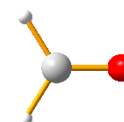

|              |            |            |             |
|--------------|------------|------------|-------------|
| $\text{HCN}$ |            |            |             |
| C            | 0.00000000 | 0.00000000 | -0.49658000 |
| H            | 0.00000000 | 0.00000000 | -1.56418000 |
| N            | 0.00000000 | 0.00000000 | 0.64909400  |

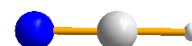

|               |             |             |            |
|---------------|-------------|-------------|------------|
| $\text{HN}_3$ |             |             |            |
| N             | 0.20085900  | -1.21355800 | 0.00000000 |
| N             | 0.00000000  | -0.10904800 | 0.00000000 |
| N             | -0.05480600 | 1.11838600  | 0.00000000 |
| H             | -1.02237100 | 1.42954500  | 0.00000000 |

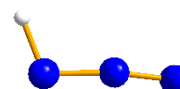

|               |             |             |            |
|---------------|-------------|-------------|------------|
| $\text{HOCN}$ |             |             |            |
| C             | 0.00000000  | 0.17863400  | 0.00000000 |
| O             | 0.14295900  | -1.10458600 | 0.00000000 |
| N             | -0.06097900 | 1.32964300  | 0.00000000 |
| H             | -0.71682000 | -1.54261000 | 0.00000000 |

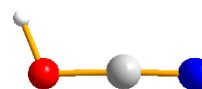

## HNCO

|   |             |             |            |
|---|-------------|-------------|------------|
| C | 0.00000000  | 0.04904200  | 0.00000000 |
| O | -0.48492400 | 1.10421000  | 0.00000000 |
| N | 0.36514600  | -1.10363100 | 0.00000000 |
| H | 1.32336900  | -1.40251600 | 0.00000000 |

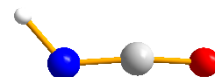

## HSCN

|   |             |             |            |
|---|-------------|-------------|------------|
| C | 0.00000000  | 0.69299000  | 0.00000000 |
| S | 0.06773500  | -0.99516800 | 0.00000000 |
| N | 0.02659900  | 1.84649400  | 0.00000000 |
| H | -1.26995300 | -1.16071200 | 0.00000000 |

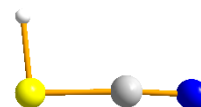

## HNCS

|   |             |             |            |
|---|-------------|-------------|------------|
| C | 0.00000000  | 0.49357400  | 0.00000000 |
| S | -0.02905400 | -1.07380700 | 0.00000000 |
| N | 0.14049300  | 1.68290800  | 0.00000000 |
| H | -0.51859400 | 2.43910600  | 0.00000000 |

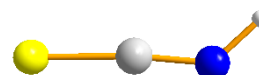

## HOCP

|   |             |             |            |
|---|-------------|-------------|------------|
| C | 0.00000000  | 0.37329100  | 0.00000000 |
| O | 0.04856800  | 1.66600500  | 0.00000000 |
| P | 0.02985800  | -1.17459300 | 0.00000000 |
| H | -0.83642000 | 2.05111000  | 0.00000000 |

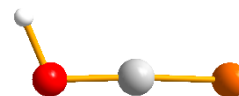

## HPCO

|   |             |             |            |
|---|-------------|-------------|------------|
| C | 0.00000000  | 0.58869200  | 0.00000000 |
| O | 0.03808000  | 1.73698600  | 0.00000000 |
| P | 0.07009900  | -1.09082600 | 0.00000000 |
| H | -1.35612900 | -1.06564400 | 0.00000000 |

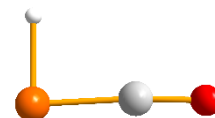

## 5 References

- [1] K. Bläsing, J. Bresien, R. Labbow, A. Schulz, A. Villinger, *Angew. Chem. Int. Ed.* 2018, **57**, 9170–9175.
- [2] A. Hinz, R. Labbow, C. Rennick, A. Schulz, J. M. Goicoechea, *Angew. Chem. Int. Ed.* 2017, **56**, 3911–3915.
- [3] G. R. Fulmer, A. J. M. Miller, N. H. Sherden, H. E. Gottlieb, A. Nudelman, B. M. Stoltz, J. E. Bercaw, K. I. Goldberg, *Organometallics* 2010, **29**, 2176–2179.
- [4] J. C. and D. J. F. M. J. Frisch, G. W. Trucks, H. B. Schlegel, G. E. Scuseria, M. A. Robb, J. R. Cheeseman, G. Scalmani, V. Barone, B. Mennucci, G. A. Peterson, H. Nakatsuji, M. Caricato, X. Li, H. P. Hratchian, A. F. Izmaylov, J. Bloino, G. Zheng, J. L. Sonnenberg, M. Hada, 2010.
- [5] K. Bläsing, J. Harloff, A. Schulz, A. Stoffers, P. Stoer, A. Villinger, *Angew. Chem. Int. Ed.* 2020, **59**, 10508–10513.
- [6] G. M. Sheldrick, *SHELXS-2014: Program for the Solution of Crystal Structures*, University of Göttingen, Germany, 2014.
- [7] G. M. Sheldrick, *SHELXL-2014: Program for the Refinement of Crystal Structures*, University of Göttingen, Germany, 2014.
- [8] G. M. Sheldrick, *SADABS Version 2014*, University of Göttingen, Germany, 2014.
- [9] *Gaussian 09, Revision C.01*, M. J. Frisch, G. W. Trucks, H. B. Schlegel, G. E. Scuseria, M. A. Robb, J. R. Cheeseman, G. Scalmani, V. Barone, B. Mennucci, G. A. Peterson, H. Nakatsuji, M. Caricato, X. Li, H. P. Hratchian, A. F. Izmaylov, J. B. Loino, G. Zheng, J. L. Sonnenberg, M. Hada, M. Ehara, K. Toyota, R. Fukuda, J. Hasegawa, M. Ishida, T. Nakajima, Y. Honda, O. Kitao, H. Nakai, T. Vreven, J. A. Montgomery Jr., J. E. Peralta, F. Ogliaro, M. Bearpark, J. J. Heyd, E. Brothers, K. N. Kudin, V. N. Staroverov, T. Keith, R. Kobayashi, J. Normand, K. Raghavachari, A. Rendell, J. C. Burant, S. S. Iyengar, J. Tomasi, M. Cossi, N. Rega, J. M. Millam, M. Klene, J. E. Know, J. B. Cross, V. Bakken, C. Adamo, J. Jaramillo, R. Gomperts, R. E. Stratmann, O. Yazyev, A. J. Austin, R. Cammi, C. Pomelli, J. W. Ochterski, R. L. Martin, K. Morokuma, V. G. Zakrzewski, G. A. Voth, P. Salvador, J. J. Dannenberg, S. Dapprich, A. D. Daniels, O. Farkas, J. B. Foresman, J. V. Ortiz, J. Cioslowski and D. J. Fox, Gaussian, Inc., Wallingford CT, 2010.
- [10] J. P. Perdew, K. Burke, M. Ernzerhof, *Phys. Rev. Lett.*, 1996, **77**, 3865–3868.
- [11] J. P. Perdew, K. Burke, M. Ernzerhof, *Phys. Rev. Lett.*, 1997, **78**, 1396–1396.
- [12] C. Adamo, V. Barone, *J. Chem. Phys.*, 1999, **110**, 6158–6170.
- [13] S. Grimme, S. Ehrlich, J. G. No Title. *J. Chem. Phys.*, 1999, **110**, 6158–6170.
- [14] L. Goerigk, Grimme, *Phys. Chem. Chem. Phys.*, 2011, **13**, 6670–6678.
- [15] T. H. Dunning, *J. Chem. Phys.*, 1989, **90**, 1007–1023.
- [16] R. A. Kendall, T. H. Dunning, R. J. Harrison, *J. Chem. Phys.*, 1992, **96**, 6796–6806.
- [17] D. E. Woon, T. H. Dunning, *J. Chem. Phys.*, 1993, **98**, 1358–1371.
- [18] K. A. Peterson, D. E. Woon, T. H. Dunning, *J. Chem. Phys.*, 1994, **100**, 7410–7415.
- [19] A. K. Wilson, T. van Mourik, T. H. Dunning, *J. Mol. Struct.*, 1996, **388**, 339–349.
